# Supplementary material for: Representation of people with comorbidity and multimorbidity in clinical trials of novel drug therapies: an individual-level participant data analysis
Source: PubMed Central journal article supplement (PMC6849229; doi:10.1186/s12916-019-1427-1), 2019-11-12
Supplement: 12916_2019_1427_MOESM1_ESM.pdf [file 12916_2019_1427_MOESM1_ESM.pdf]

# Representation of people with comorbidity in clinical trials of novel drug therapies; an individual-level participant data analysis

11 July, 2019

## 1 Selection of trials - Protocol

The search strategy and selection process for the individual-level participant data (IPD) trials included in this analysis were pre-registered via PROSPERO. The record is available at [https://www.crd.york.ac.uk/PROSPERO/display\\_record.php?RecordID=48202](https://www.crd.york.ac.uk/PROSPERO/display_record.php?RecordID=48202). For convenience, the relevant sections of the protocol as submitted with that application are reproduced below.

### 1.1 Overview

Trials were chosen that enrolled a minimum of 300 participants, had no maximum age or a maximum age of  $\geq 60$ , and included drugs used to treat or prevent long term medical (and, as these are a common issue in the elderly, urological) conditions. Both short and long-term indications arising within the context of long-term conditions were included (e.g. short-term post MI therapy). We excluded trials where the treatment was for neoplastic, infectious, affective, psychotic or developmental disorders. We did not exclude trials where patients had cancer and were being treated with, for example, antithrombotic drugs to prevent DVT or PE. Topical eye and primary prevention trials in the general adult population were also excluded.

The complete list of included drugs is listed in the relevant sections below. Initially we included drugs acting on male and female sex hormones as these are used to treat certain chronic diseases. However, in view of the widespread use of the latter in treating cancer, and as a contraceptive and for the symptoms of menopause – we excluded these before obtaining any individual-level patient data (IPD), as these conditions fall outside our scope.

Representative samples of individual-level patient data were not available as access to IPD remains incomplete; not all sponsors share trial data, and among those that do, not all trials are shared. Therefore, rather than a representative sample we aimed to obtain a set of relevant trials. Therefore, we searched for trials within three repositories for which clinical trial data are available – the National Institutes of Health NIH BioLINCC repository (<https://biolincc.nhlbi.nih.gov/home/>), the multi-sponsor Clinical Study Data Request (CSDR) repository (<https://www.clinicalstudydatarequest.com/>) and the Yale University Open Data Access (YODA) Project (<http://yoda.yale.edu/>). We then performed a search within [clinicaltrials.gov](https://clinicaltrials.gov/), the U.S. National Library of Medicine Clinical Trial Register (<https://clinicaltrials.gov/>), to obtain a “denominator” set of trials, of which the trials identified by screening the repositories can be considered a subset.

Any repository trial which was not found on applying our search criteria to the registry was excluded. In this way, while the set of trials for which we have IPD cannot be said to be representative (in the sense of a random or complete sample), it can be related to a wider body of trials in a public registry.

## 1.2 Clinical Study Data Request – trial repository

Using the search tool provided within the CSDR repository, we obtained a list of all phase 2/3, 3 and 4 trials on CSDR on 2016/11/21. This identified 1821 trials for which we downloaded a short trial description.

As in the following example, each trial description contained the trial title, sponsor, medicine, condition, phase and additional study ID:-

- sponsor\_id: ASTELLAS-E05-CL-3002
- title: A Randomized, Controlled, Long-term Safety Study Evaluating the Effect of Repeated Applications of QUTENZATM plus Standard of Care versus Standard of Care alone in Patients with Painful Diabetic Peripheral Neuropathy (PACE)
- medicine: capsaicin
- condition: Painful diabetic neuropathy
- phase: 3
- clinical study id: E05-CL-3002

There were 292 unique condition strings. These did not appear to be from a controlled vocabulary, and so each was reviewed manually and assigned into one of 25 groups (Table S1.1 ).

Table S1.1: Conditions as recorded on CSDR site

| <b>Selected Type of condition</b> |           | <b>Conditions</b>                                                                                                                                                                                                                                                                                                                                                                                                                                                                                                                                                                                                                                                                                                                                                                                                                                                                                                                                                                                                                                                                                                                                                                 |
|-----------------------------------|-----------|-----------------------------------------------------------------------------------------------------------------------------------------------------------------------------------------------------------------------------------------------------------------------------------------------------------------------------------------------------------------------------------------------------------------------------------------------------------------------------------------------------------------------------------------------------------------------------------------------------------------------------------------------------------------------------------------------------------------------------------------------------------------------------------------------------------------------------------------------------------------------------------------------------------------------------------------------------------------------------------------------------------------------------------------------------------------------------------------------------------------------------------------------------------------------------------|
| No                                | aesthetic | Alopecia                                                                                                                                                                                                                                                                                                                                                                                                                                                                                                                                                                                                                                                                                                                                                                                                                                                                                                                                                                                                                                                                                                                                                                          |
| No                                | affective | Acute Mania, Anxiety Disorder, Anxiety Disorders, Attention Deficit Hyperactivity Disorder, Major Depressive Disorder, Oppositional Defiant Disorder, Bipolar Disorder, Depressive Disorder, Major, Dermatitis, Atopic, Insomnia, Mood Disorders, Obsessive-Compulsive Disorder and Depressive Disorder, Obsessive-Compulsive Disorder, Panic Disorder, Post-Traumatic Stress Disorder, Schizophrenia, Social Phobia, Treatment-Resistant Depression                                                                                                                                                                                                                                                                                                                                                                                                                                                                                                                                                                                                                                                                                                                              |
| Yes                               | bone      | osteoporosis with pathological fracture, Osteoporosis, Male, Hip Fracture                                                                                                                                                                                                                                                                                                                                                                                                                                                                                                                                                                                                                                                                                                                                                                                                                                                                                                                                                                                                                                                                                                         |
| Yes                               | cancer    | Breast Cancer, Breast Neoplasms, Cancer , Cancer, Advanced Gastric, Breast, Carcinoma, Non-Small-Cell Lung, Adenocarcinoma, Renal Cell, Chronic Lymphocytic Leukemia, Colonic Neoplasms, Differentiated Thyroid Cancer, Erosive Esophagitis, Gastroesophageal Reflux Disease, gastric cancer stomach neoplasms, Gastric Cancer, Gastric cancer/ Stomach neoplasms, Head and Neck Neoplasms, Squamous Cell, HER2-positive metastatic breast cancer, HER2-positive metastatic gastric cancer, locally advanced metastatic or recurrent non-squamous non-small cell lung cancer, Lymphoid Leukaemia, Lymphoma, Non-Hodgkin, malignant neoplasm breast unspecified site, malignant neoplasm of breast, Malignant Neoplasm Of Bronchus And Lung, malignant neoplasm of colon/rectum, malignant neoplasm of colon, malignant neoplasm of rectum, Malignant Neoplasm Of Lung, malignant neoplasm of ovary, malignant neoplasm of pancreas, Mesothelioma, metastatic colorectal cancer, Multiple myeloma (MM), Myelodysplastic syndrome (MDS), Neoplasms, Prostate, Non-Small Cell Lung Cancer, Non-small cell lung cancer, Nonsquamous non-small cell lung cancer (NSCLC). , Nonsquamous |

Table S1.1: Conditions as recorded on CSDR site

| Selected Type of condition |                                   | Conditions                                                                                                                                                                                                                                                                                                                                                                                                                                                                                                                                                                                                                                                                                                                                                                                                                                                                                                                                                                                                                                                                                                                                                                                                                                                                          |
|----------------------------|-----------------------------------|-------------------------------------------------------------------------------------------------------------------------------------------------------------------------------------------------------------------------------------------------------------------------------------------------------------------------------------------------------------------------------------------------------------------------------------------------------------------------------------------------------------------------------------------------------------------------------------------------------------------------------------------------------------------------------------------------------------------------------------------------------------------------------------------------------------------------------------------------------------------------------------------------------------------------------------------------------------------------------------------------------------------------------------------------------------------------------------------------------------------------------------------------------------------------------------------------------------------------------------------------------------------------------------|
| Yes                        | Chronic lower respiratory disease | Non-Small Cell Lung Cancer (NSCLC). , Ovarian Cancer, refractory metastatic breast cancer, renal cell carcinoma, Risk Reduction of Invasive Breast Cancer in Postmenopausal Women, Cardiovascular Disease, Sarcoma, Soft tissue, Urothelium Cancer<br>Asthma, Bronchitis, Chronic, Bronchospasm, Chronic Obstructive Pulmonary Disease (COPD), Pulmonary Disease, Chronic Obstructive, Ph, Asthma<br>Acute Coronary Syndrome, acute coronary syndrome, Acute Ischemic Hemispheric Stroke, acute ischemic stroke, Atherosclerosis, Atrial Fibrillation, Stroke, Cardiovascular Diseases, Cerebrovascular Accident, Coronary Arteriosclerosis, Fibrillation, Atrial, Heart Arrest, Heart Failure, Chronic (CHF), Heart failure, Congestive and Microalbuminuria, Congestive, Hypertension, Pulmonary, Diabetes Mellitus, Type 2, Diabetic Nephropathies, Hypertriglyceridemia, Hypertrophy, Left Ventricular, Myocardial Infarction, Myocardial Perfusion Imaging, Non-valvular Atrial Fibrillation, Obesity, Atrial Fibrillation, Embolism                                                                                                                                                                                                                                           |
| Yes                        | Cardiovascular disease            | Atrial, Heart Arrest, Heart Failure, Chronic (CHF), Heart failure, Congestive and Microalbuminuria, Congestive, Hypertension, Pulmonary, Diabetes Mellitus, Type 2, Diabetic Nephropathies, Hypertriglyceridemia, Hypertrophy, Left Ventricular, Myocardial Infarction, Myocardial Perfusion Imaging, Non-valvular Atrial Fibrillation, Obesity, Atrial Fibrillation, Embolism                                                                                                                                                                                                                                                                                                                                                                                                                                                                                                                                                                                                                                                                                                                                                                                                                                                                                                      |
| Yes                        | Dementia                          | Alzheimer's Disease, Dementia                                                                                                                                                                                                                                                                                                                                                                                                                                                                                                                                                                                                                                                                                                                                                                                                                                                                                                                                                                                                                                                                                                                                                                                                                                                       |
| Yes                        | Dermatological                    | Acne Vulgaris, chronic idiopathic urticaria (CIU) , Chronic Idiopathic Urticaria (CIU)                                                                                                                                                                                                                                                                                                                                                                                                                                                                                                                                                                                                                                                                                                                                                                                                                                                                                                                                                                                                                                                                                                                                                                                              |
| No                         | Developmental                     | Attention Deficit Hyperactivity Disorder, Turner Syndrome                                                                                                                                                                                                                                                                                                                                                                                                                                                                                                                                                                                                                                                                                                                                                                                                                                                                                                                                                                                                                                                                                                                                                                                                                           |
| Yes                        | Diabetes                          | Diabetes Mellitus, Diabetes Mellitus, Type 1, Type 2 , Type 2, type 2, Hyperglycemia, Hypertension, Renal Insufficiency, Diabetic Eye Disease, Diabetic Nephropathies, Diabetic Neuropathies, Depressive Disorder, Major, Diabetic Peripheral Neuropathic Pain, Neuropathy, Diabetic, Painful diabetic neuropathy, Type 2 Diabetes Mellitus                                                                                                                                                                                                                                                                                                                                                                                                                                                                                                                                                                                                                                                                                                                                                                                                                                                                                                                                         |
| Yes                        | Endocrine                         | Hypogonadism                                                                                                                                                                                                                                                                                                                                                                                                                                                                                                                                                                                                                                                                                                                                                                                                                                                                                                                                                                                                                                                                                                                                                                                                                                                                        |
| Yes                        | Epilepsy                          | Epilepsy, Epilepsy, Partial, Tonic-Clonic, Lennox-Gastaut Syndrome, Seizures                                                                                                                                                                                                                                                                                                                                                                                                                                                                                                                                                                                                                                                                                                                                                                                                                                                                                                                                                                                                                                                                                                                                                                                                        |
| No                         | ophthalmological                  | Allergic conjunctivitis, Neovascular Age-related Macular Degeneration, Open-Angle Glaucoma, Ocular Hypertension, Retinal Vascular Occlusion                                                                                                                                                                                                                                                                                                                                                                                                                                                                                                                                                                                                                                                                                                                                                                                                                                                                                                                                                                                                                                                                                                                                         |
| No                         | infection                         | Acellular pertussis, Diphtheri, Acellular pertussis, Diphtheria, Haemoph, Haemophilus in, Haemophilus influenz, Haemophilus influenza, Haemophilus influenzae, Haemophilus influenzae typ, Haemophilus influenzae type b, He, Hepa, Hepatiti, Hepatitis B, Pol, Poliomyelitis, Tetanus, acellular pertussis, Tet, Phas, Acquired Immunodeficiency Syndrome, chronic hepatitis b, chronic hepatitis B, chronic hepatitis c, Whol, Whole Cell Pertussis, Phase, Acellular Pertussis, Neisseria Meningitidis, Hepatitis A, Chronic, Hepatitis C, Herpes Genitalis, Herpes Labialis, Herpes Simplex, hiv disease, HIV Infections, Hepatic Insufficiency, Metabolism, Lipids, Impetigo, Infection, Human Immunode, Human Immunodeficiency Virus I, Human Immunodeficiency Virus, Infections, Herpesviridae, Meningococcal, Papillomavirus, Rotavirus, Streptococcal, Influenza infection, Influenza, Human, influenza, Invasive aspergillosis / Invasive mucormycosis, Invasive Fungal Infections, Malaria, Falciparum, Measles, Mumps, Rubella , Rubella, Varicella, Otitis Maedia, Pharyngitis, Pneumonia, Community-Acquired, Severe Sepsis, Skin Infections, Bacterial, Streptococcus pneumoniae, Diphth, Therapeutic treatment of inhalation anthrax, Typhoid Fever, viral diseases |

Table S1.1: Conditions as recorded on CSDR site

| Selected Type of condition |                     | Conditions                                                                                                                                                                                                                                                                                                                                                                                                                                                                                                                  |
|----------------------------|---------------------|-----------------------------------------------------------------------------------------------------------------------------------------------------------------------------------------------------------------------------------------------------------------------------------------------------------------------------------------------------------------------------------------------------------------------------------------------------------------------------------------------------------------------------|
| Yes                        | inflammatory        | Crohn's Disease, Psoriasis, Psoriatic Arthritis, Ulcerative Colitis, Crohn's Disease                                                                                                                                                                                                                                                                                                                                                                                                                                        |
| Yes                        | liver               | Liver Diseases                                                                                                                                                                                                                                                                                                                                                                                                                                                                                                              |
| Yes                        | neurological        | Dermatitis, Chronic, Dermatitis, Seborrheic, Idiopathic Restless Legs Syndrome, Migraine Disorders and Premenstrual Syndrome, Migraine Disorders, Migraine, Without Aura, Multiple Sclerosis, Parkinson Disease, Depression, Parkinson's Disease Dementia, Peripheral Neuropathies, Restless Legs Syndrome, Tourette Syndrome                                                                                                                                                                                               |
| No                         | not suitable, other | Central Venous Access Devices, Healthy Subjects, Premenstrual Syndrome                                                                                                                                                                                                                                                                                                                                                                                                                                                      |
| Yes                        | pain                | Analgesia, Chronic Lower Back Pain, Fibromyalgia, Irritable Bowel Syndrome with constipation (IBS-C), Neuropathic pain, Osteoarthritis Knee Pain, Osteoarthritis, pain, not elsewhere classified                                                                                                                                                                                                                                                                                                                            |
| Yes                        | rheumatological     | ankylosing spondylitis , Arthritis, Juvenile Rheumatoid, Rheumatoid, Axial Spondyloarthritis , Lupus, rheumatoid arthritis (juvenile), Rheumatoid Arthritis, rheumatoid arthritis, Systemic Lupus Erythematosus                                                                                                                                                                                                                                                                                                             |
| Yes                        | Risk-factor         | Smoking Cessation                                                                                                                                                                                                                                                                                                                                                                                                                                                                                                           |
| Yes                        | suitable, other     | Erectile Dysfunction, Fluoxetine-Associated Sexual Dysfunction, Hyperuricemia, Polyps, Nasal, Pulmonary Fibrosis, Purpura, Thrombocytopenic, Idiopathic, Rhinitis, Allergic, Perennial and Seasonal, Perennial, Seasonal, Vasomotor, Sinusitis                                                                                                                                                                                                                                                                              |
| Yes                        | surgical            | Arthroplasty, Replacement, Knee, Thromboembolism, Arthroplasty, Thromboembolism, Prevention of Venous Thromboembolism, Moderate Renal Impairment (CrCl 30-50 mL/Min), Benign Prostatic Hyperplasia, Catheter clearance, Constipation, Erectile Dysfunction, Femoral Neck (Hip) Fracture, Lower Urinary Tract Symptoms / Benign Prostatic Hyperplasia, Lower Urinary Tract Symptoms / Benign Prostatic Hyperplasia, , Prostatic Hyperplasia, Urinary Bladder, Overactive, Urinary Incontinence, Stress, Venous Insufficiency |
| Yes                        | Thromboembolic      | Embolism, Pulmonary, Secondary prevention of Thromboembolic events, Thrombosis, Venous, Thromboembolism, Arthroplasty, Replacement, Hip, Thromboprophylaxis, Venous Thromboembolism, Deep Vein Thrombosis (DVT), Pulmonary Embolism (PE), Thromboembolism, Venous Thrombosis                                                                                                                                                                                                                                                |
| Yes                        | Transplant          | Heart transplantation, Kidney Transplantation, Liver Transplantation, Transplantation, Kidney, Liver                                                                                                                                                                                                                                                                                                                                                                                                                        |

We initially excluded trials where the condition was classified as aesthetic, affective, developmental, eye-disease, or infectious or "other-unsuitable". Of the latter, the conditions being treated were "Central Venous Access Devices", "Healthy Subjects" and "Premenstrual Syndrome". On applying these exclusion criteria, 850 trials remained.

For each of these, the trial drug was assigned to a unique concept ID from the RXNORM database and a label from the World Health Organisation (WHO) Anatomic Therapeutic classification (ATC). Where a drug did not yet have a WHO ATC label, it was assigned to the closest class. Each class was reviewed and trials with the following drug-classes were excluded - A01AD, A06AG, A06AX, D01AE, D05AX, D07AD, D10AE, D10AF, G01AC, D07AC, D11AH, G01AF, G02CC, G01AA, J01CA, J02AB, J01CR, J01FF, M02AA, M02AA, M02AB, N01BX, N05AH, N06AB, N06AX, R01AD, R01AX, S01BC, S01LA, S01XA, S01GX, V10XA.

On applying these exclusion criteria, 615 trials remained.

Drugs have a one-to-many relationship with ATC classes, so some trials with drugs in excluded classes were nonetheless retained (eg corticosteroid drugs can be assigned to one of several classes depending on the route of administration).

To exclude trials of anti-cancer therapies, and trials of immune-suppression therapy for transplantation, we then excluded trials where the condition was cancer or transplantation, and the drug was in the WHO ATC antineoplastic and immunomodulating drugs class (L), the Testosterone-5-alpha reductase inhibitors class (G04CB) or the sex hormones and modulators of the genital system class (G03). We did not exclude all trials with these drugs in order to retain trials of, for example, the use of immunomodulating drugs for inflammatory arthropathies.

On applying these exclusion criteria, 541 unique trials remained.

We then identified which of the trials had been registered in clinicaltrials.gov. 152 were not registered (142 of these were started before the requirement to register). On excluding un-registered trials 382 trials remained.

Of these, the following were excluded based on information obtained from clinicaltrials.gov (Table S1.2).

Table S1.2: CSDR trials excluded based on additional eligibility criteria

| <b>Exclusion criteria</b>    | <b>Number of trials excluded</b> |
|------------------------------|----------------------------------|
| Enrolment < 300              | 131                              |
| Excludes older people        | 24                               |
| Did not meet design criteria | 94                               |
| Any exclusion                | 177                              |

On applying these exclusion criteria 205 trials remained. On reviewing these, two were subsequently excluded based on the indication (1 for erectile dysfunction, 1 for delayed growth).

We subsequently obtained detailed description data for each trial from the CSDR repository. We found that one trial (BI-122.56) was no longer listed on the repository and so it was removed, leaving 202 trials. After applying to CSDR for these trials we removed one clinical trial of tenecteplase in out of hospital cardiac arrest (BI-1123.18) and added one trial of Pramipexole for Parkinson's disease (BI-248.525) following advice from the trial sponsor.

These 202 trials included a total of 312,922 participants.

After examining the US clinical trials register, we reduced the number of eligible conditions which resulted in excluding 3 additional trials as unsuitable for analysis (2 were trials of antiemetics for post-operative nausea and vomiting (NCT00334152 and NCT00326248) and 1 was for a selective estrogen receptor modulator (NCT00670319). In the case of the latter trial, this was excluded because the inclusion of this trial would have led to a much larger dataset including large numbers of trials for unsuitable indications. This is because of the large number of trials for drugs acting on the female sex-hormone axis for contraception, anti-cancer therapy and/or the symptomatic management of menopause.

This further restriction resulted in a total of 199 trials.

## 1.3 YODA

We performed a search of the YODA trial repository on 18<sup>th</sup> May 2017. We searched the repository for trials with the following drug categories (Table S1.3)) or condition categories (Table S1.4).

Table S1.3: YODA Selected drug categories

| <b>Drug class</b>                               | <b>Selected</b> |
|-------------------------------------------------|-----------------|
| Alzheimer's Disease - Cholinesterase Inhibitors | Y               |
| Anticonvulsants                                 | Y               |
| Antimycobacterial agents                        |                 |

Table S1.3: YODA Selected drug categories

| <b>Drug class</b>                                  | <b>Selected</b> |
|----------------------------------------------------|-----------------|
| Antipsoriatics                                     | Y               |
| Antirheumatic agents - biologic response modifiers | Y               |
| Antiviral Agent                                    |                 |
| Atypical antipsychotics                            |                 |
| Cardiovascular devices                             |                 |
| Colony-stimulating factors                         | Y               |
| Diabetes Related- Other                            | Y               |
| Hormones                                           | Y               |
| Immunizations                                      |                 |
| Oncology - Antibiotic                              |                 |
| Orthopedic device                                  |                 |
| Quinolones - 3rd gen.                              |                 |
| Stimulants/ADHD/Anorexiant                         |                 |

Table S1.4: YODA Selected condition categories

| <b>Disease</b>                                      | <b>Selected</b> |
|-----------------------------------------------------|-----------------|
| Anemia                                              |                 |
| Arthritis, Juvenile                                 |                 |
| Arthritis, Psoriatic                                | Y               |
| Arthritis, Rheumatoid                               | Y               |
| Atrial Fibrillation                                 | Y               |
| Attention Deficit and Disruptive Behavior Disorders |                 |
| Attention Deficit Hyperactivity Disorder            |                 |
| Autistic Disorder                                   |                 |
| Bipolar Disorder                                    |                 |
| Colitis, Ulcerative                                 | Y               |
| Conduct Disorder                                    |                 |
| Critical Illness                                    |                 |
| Crohn's Disease                                     | Y               |
| Dementia                                            | Y               |
| Depressive Disorder, Major                          |                 |
| Diabetes Mellitus, Type 2                           | Y               |
| Epilepsy                                            | Y               |
| Hepatitis C                                         |                 |
| HIV Infections                                      |                 |
| Leukemia                                            |                 |
| Migraine Disorders                                  | Y               |
| Multiple Myeloma                                    |                 |
| Neoplasms                                           |                 |
| Neoplasms, Breast                                   |                 |
| Neoplasms, Ovarian                                  |                 |
| Neoplasms, Prostatic                                |                 |
| Partial Seizure Disorder                            | Y               |
| Psoriasis                                           | Y               |
| Psychosis                                           |                 |
| Pyelonephritis                                      |                 |
| Rabies                                              |                 |
| Sacroiliac Joint Dysfunction                        | Y               |
| Schizoaffective Disorder                            |                 |
| Schizophrenia                                       |                 |
| Seizures                                            | Y               |
| Spondylitis, Ankylosing                             | Y               |
| Tuberculosis                                        |                 |
| Urinary Tract Infections                            |                 |

This yielded 90 trials with 4533 participants. Of these, 58 trials had 300 or more participants. Of these, 56 trials were phase 2/3, phase 3 or phase 4.

We reviewed the title, drug, condition and comparator of each. We excluded one trial which compared two doses of the same drug, 1 trial which used an anti-psychotic to manage psychosis in Alzheimer’s disease, and 11 trials which examined ineligible conditions (Table S1.5).

Table S1.5: YODA Excluded trials as ineligible conditions

| Condition                           | Trials |
|-------------------------------------|--------|
| Behavioural disturbance in dementia | 3      |
| Bipolar affective disorder          | 2      |
| Bipolar affective disorder          | 1      |
| Cancer                              | 1      |
| Critically ill                      | 1      |
| Metastatic breast cancer            | 1      |
| Prostate cancer                     | 2      |

On excluding these, 43 trials remained. Trial data was extracted from the clinicaltrials.gov register for each of these. None were excluded based on age of eligibility, numbers enrolled or the design of the study. Five were excluded on the basis of having very restrictive inclusion criteria meaning that these trials were tantamount to phase 2 trials.

The remaining 38 trials were requested from the YODA repository.

## 1.4 NIH Biolncc

We manually reviewed the titles and study summaries for 117 entries comprising trials (or in some cases groups of studies including one or more trial) listed as “randomised clinical trials” on the NIH BioLINCC repository. 93 were ineligible (Table S1.6).

Table S1.6: NIH BioLINCC “Randomised clinical trial” entries

| Reason(s) for exclusion                                      | Sum of Trial/network |
|--------------------------------------------------------------|----------------------|
| Acute illness                                                | 3                    |
| Acute lung injury                                            | 10                   |
| Cancer                                                       | 1                    |
| Children only                                                | 5                    |
| Depression                                                   | 1                    |
| Infectious diseases                                          | 3                    |
| Maximum age of participants 55                               | 1                    |
| Not a drug                                                   | 36                   |
| Not a randomised controlled trial, non-drug                  | 1                    |
| Too few participants                                         | 11                   |
| Too few adult participants (less than 300 adults)            | 1                    |
| Too few participants or not a trial                          | 11                   |
| Too few participants, not a trial or not a drug intervention | 1                    |
| Transplant                                                   | 8                    |
| <b>Total</b>                                                 | <b>93</b>            |

Of the remaining 24 trials, 8 were conducted before 1990, 4 compared treatment strategies rather than specific interventions, one examined primary prevention in the general adult population and one included an ineligible treatment (female sex hormones). Ten trials remained.

## 1.5 Clinicaltrials.gov

### 1.5.1 Trial date, status, conditions and intervention types

We then searched [clinicaltrials.gov](http://clinicaltrials.gov) on 2017-09-04 for eligible trials. The search was performed via the Clinical Trials Transformation Initiative (CTTI) Access to Aggregate Content of ClinicalTrials.gov (AACT) PostgreSQL database running the RPostgreSQL package from within R. As with the repository searches, the R files which give a complete description of the search, and can be used to reproduce both the search and data cleaning, will be made available via a code repository on publishing the findings. Details of the completeness of the database and its use for research are available at <http://aact.ctti-clinicaltrials.org/>.

Initial criteria were used to identify a set of trials from the [clinicaltrials.gov](http://clinicaltrials.gov) (CTG) registry (Table S1.7).

Table S1.7: CTG Initial search criteria

| Criteria                                                                                                                                                                                                                                                                                                                                                                                                                                                                                                                                                                                                                                                                                                                                                                                                                                                                                                                                                                                                                                                                                                                                                                                                                                                                                                                                                                                                                                                                                                                                                                                                                                                                                                                                                                                                                                                                                                                                                                                                                                                                                                                                                                                                                                    | Trials |
|---------------------------------------------------------------------------------------------------------------------------------------------------------------------------------------------------------------------------------------------------------------------------------------------------------------------------------------------------------------------------------------------------------------------------------------------------------------------------------------------------------------------------------------------------------------------------------------------------------------------------------------------------------------------------------------------------------------------------------------------------------------------------------------------------------------------------------------------------------------------------------------------------------------------------------------------------------------------------------------------------------------------------------------------------------------------------------------------------------------------------------------------------------------------------------------------------------------------------------------------------------------------------------------------------------------------------------------------------------------------------------------------------------------------------------------------------------------------------------------------------------------------------------------------------------------------------------------------------------------------------------------------------------------------------------------------------------------------------------------------------------------------------------------------------------------------------------------------------------------------------------------------------------------------------------------------------------------------------------------------------------------------------------------------------------------------------------------------------------------------------------------------------------------------------------------------------------------------------------------------|--------|
| Start date >= 1990-01-01                                                                                                                                                                                                                                                                                                                                                                                                                                                                                                                                                                                                                                                                                                                                                                                                                                                                                                                                                                                                                                                                                                                                                                                                                                                                                                                                                                                                                                                                                                                                                                                                                                                                                                                                                                                                                                                                                                                                                                                                                                                                                                                                                                                                                    | 16957  |
| Study type – interventional                                                                                                                                                                                                                                                                                                                                                                                                                                                                                                                                                                                                                                                                                                                                                                                                                                                                                                                                                                                                                                                                                                                                                                                                                                                                                                                                                                                                                                                                                                                                                                                                                                                                                                                                                                                                                                                                                                                                                                                                                                                                                                                                                                                                                 |        |
| Status – ‘Active, not recruiting’, ‘Completed’, ‘Terminated’                                                                                                                                                                                                                                                                                                                                                                                                                                                                                                                                                                                                                                                                                                                                                                                                                                                                                                                                                                                                                                                                                                                                                                                                                                                                                                                                                                                                                                                                                                                                                                                                                                                                                                                                                                                                                                                                                                                                                                                                                                                                                                                                                                                |        |
| Phase – 2/3, 3 or 4                                                                                                                                                                                                                                                                                                                                                                                                                                                                                                                                                                                                                                                                                                                                                                                                                                                                                                                                                                                                                                                                                                                                                                                                                                                                                                                                                                                                                                                                                                                                                                                                                                                                                                                                                                                                                                                                                                                                                                                                                                                                                                                                                                                                                         |        |
| Enrollment >= 300 (or start_date < ‘2005-01-01’)                                                                                                                                                                                                                                                                                                                                                                                                                                                                                                                                                                                                                                                                                                                                                                                                                                                                                                                                                                                                                                                                                                                                                                                                                                                                                                                                                                                                                                                                                                                                                                                                                                                                                                                                                                                                                                                                                                                                                                                                                                                                                                                                                                                            |        |
| Participants not excluded for being 60 or older                                                                                                                                                                                                                                                                                                                                                                                                                                                                                                                                                                                                                                                                                                                                                                                                                                                                                                                                                                                                                                                                                                                                                                                                                                                                                                                                                                                                                                                                                                                                                                                                                                                                                                                                                                                                                                                                                                                                                                                                                                                                                                                                                                                             | 13079  |
| Study design is “Factorial Assignment”, “Parallel Assignment” and “allocation random”                                                                                                                                                                                                                                                                                                                                                                                                                                                                                                                                                                                                                                                                                                                                                                                                                                                                                                                                                                                                                                                                                                                                                                                                                                                                                                                                                                                                                                                                                                                                                                                                                                                                                                                                                                                                                                                                                                                                                                                                                                                                                                                                                       | 10841  |
| Selected conditions (see below) found in study title or in browse_conditions or conditions table.                                                                                                                                                                                                                                                                                                                                                                                                                                                                                                                                                                                                                                                                                                                                                                                                                                                                                                                                                                                                                                                                                                                                                                                                                                                                                                                                                                                                                                                                                                                                                                                                                                                                                                                                                                                                                                                                                                                                                                                                                                                                                                                                           | 4348   |
| Intervention type is “Biological” or “Drug”                                                                                                                                                                                                                                                                                                                                                                                                                                                                                                                                                                                                                                                                                                                                                                                                                                                                                                                                                                                                                                                                                                                                                                                                                                                                                                                                                                                                                                                                                                                                                                                                                                                                                                                                                                                                                                                                                                                                                                                                                                                                                                                                                                                                 | 3872   |
| Conditions were eligible if the string (or the reverse of the string eg “Angina, Unstable” or “Unstable angina”) corresponding to one or more the following MESH terms (or to a more specific terms in the MESH hierarchy) was found:- C05.116.198.579, C05.116.900.853.625.800, C05.550.114, C05.799.114, C05.799.414, C05.799.613, C06.405.117.119.500.204, C06.405.117.119.500.432, C06.405.117.119.500.450, C06.405.117.119.500.484, C06.405.117.119.500.484.500, C06.405.117.119.500.742, C06.405.117.620, C06.405.205.265.231, C06.405.205.731, C06.405.469.432, C06.405.608.348, C06.405.748.240, C06.405.748.398, C06.552.380.350.050, C08.127.108, C08.127.384, C08.127.446.567, C08.381.423, C08.381.483.487, C08.381.483.487.500, C08.381.495, C08.381.746, C08.381.765, C08.460.799, C08.674.095, C08.730.099.567, C09.603.799.315, C10.114.375.500, C10.228.140.079.862, C10.228.140.300.150, C10.228.140.300.275.800, C10.228.140.300.400, C10.228.140.300.510.200.325, C10.228.140.300.510.200.387, C10.228.140.300.510.200.418, C10.228.140.300.510.800.500, C10.228.140.300.775, C10.228.140.380.100, C10.228.140.380.230, C10.228.140.490, C10.228.140.546.399.750, C10.228.662.600, C10.574.812, C10.574.945.249, C10.803, C12.294.565.500, C12.777.419.192, C12.777.829.866, C12.777.934.284, C12.777.934.852, C13.351.968.829.813, C13.351.968.934.252, C13.351.968.934.814, C14.280.067.198, C14.280.067.248, C14.280.434, C14.280.647, C14.907.137.126.307, C14.907.137.126.307.500, C14.907.137.126.339, C14.907.137.126.372.500, C14.907.137.126.669, C14.907.253.092.477.200, C14.907.253.560.350.500, C14.907.253.855, C14.907.355, C14.907.355.350.700, C14.907.355.590, C14.907.355.830, C14.907.489, C14.907.585, C14.907.617, C17.300.480, C17.300.540, C17.300.775, C17.300.799, C17.800.784, C17.800.784.602, C17.800.784.801, C17.800.784.801.500, C17.800.859.675, C17.800.862.945, C18.452.394.750, C18.452.584.500.500.396, C18.452.584.500.500.438, C18.452.584.500.500.851, C18.452.648.398.450, C19.246.267, C19.246.300, C20.111.193, C20.111.197, C20.111.198, C20.111.199, C20.111.258.250.500, C20.111.327, C20.111.567, C20.543.480.680.095, C20.543.480.680.443, F03.087.400, or F03.675.700. |        |

Table S1.8 groups these MeSH codes into wider categories and provides the preferred MeSH term.

Table S1.8: MeSH Terms Applied to [clinicaltrials.gov](http://clinicaltrials.gov) database

| Category        | MeSH term             | Code                    |
|-----------------|-----------------------|-------------------------|
| Musculoskeletal | Osteoporosis          | C05.116.198.579         |
|                 | Spondyloarthropathies | C05.116.900.853.625.800 |



Table S1.8: MeSH Terms Applied to clinicaltrials.gov database

| Category                              | MeSH term                          | Code                        |
|---------------------------------------|------------------------------------|-----------------------------|
| Digestive system diseases             | Arthritis                          | C05.550.114                 |
|                                       | Arthritis, Rheumatoid              | C05.799.114                 |
|                                       | Gout                               | C05.799.414                 |
|                                       | Osteoporosis                       | C05.799.613                 |
|                                       | CREST Syndrome                     | C06.405.117.119.500.204     |
|                                       | Oesophageal Achalasia              | C06.405.117.119.500.432     |
|                                       | Oesophageal spasm, diffuse         | C06.405.117.119.500.450     |
|                                       | Gastro-oesophageal reflux          | C06.405.117.119.500.484     |
|                                       | Laryngopharyngeal reflux           | C06.405.117.119.500.484.500 |
|                                       | Plummer-Vinson Syndrome            | C06.405.117.119.500.742     |
|                                       | Oesophagitis                       | C06.405.117.620             |
|                                       | Colitis, Ulcerative                | C06.405.205.265.231         |
|                                       | Inflammatory Bowel Diseases        | C06.405.205.731             |
|                                       | Inflammatory Bowel diseases        | C06.405.469.432             |
|                                       | Oesophagitis, peptic               | C06.405.608.348             |
|                                       | Duodenogastric reflux              | C06.405.748.240             |
|                                       | Gastritis                          | C06.405.748.398             |
| Respiratory Tract Diseases            | Hepatitis, autoimmune              | C06.552.380.350.050         |
|                                       | Asthma                             | C08.127.108                 |
|                                       | Bronchiectasis                     | C08.127.384                 |
|                                       | Bronchitis, chronic                | C08.127.446.567             |
|                                       | Hypertension, Pulmonary            | C08.381.423                 |
|                                       | Idiopathic Interstitial Pneumonias | C08.381.483.487             |
|                                       | Idiopathic Pulmonary Fibrosis      | C08.381.483.487.500         |
|                                       | Lung Diseases, Obstructive         | C08.381.495                 |
|                                       | Pulmonary Embolism                 | C08.381.746                 |
|                                       | Pulmonary Fibrosis                 | C08.381.765                 |
|                                       | Rhinitis                           | C08.460.799                 |
|                                       | Asthma                             | C08.674.095                 |
|                                       | Bronchitis, Chronic                | C08.730.099.567             |
|                                       | Otorhinolaryngologic Diseases      | Rhinitis, Allergic          |
| Multiple Sclerosis                    |                                    | C10.114.375.500             |
| Parkinsonian Disorders                |                                    | C10.228.140.079.862         |
| Brain Ischaemia                       |                                    | C10.228.140.300.150         |
| Stroke, Lacunar                       |                                    | C10.228.140.300.275.800     |
| Dementia, Vascular                    |                                    | C10.228.140.300.400         |
| Infarction, Anterior Cerebral Artery  |                                    | C10.228.140.300.510.200.325 |
| Infarction, Middle Cerebral Artery    |                                    | C10.228.140.300.510.200.387 |
| Infarction, Posterior Cerebral Artery |                                    | C10.228.140.300.510.200.418 |
| Dementia, Vascular                    |                                    | C10.228.140.300.510.800.500 |
| Stroke                                |                                    | C10.228.140.300.775         |
| Alzheimer Disease                     |                                    | C10.228.140.380.100         |
| Dementia, Vascular                    |                                    | C10.228.140.380.230         |
| Epilepsy                              |                                    | C10.228.140.490             |
| Migraine Disorders                    |                                    | C10.228.140.546.399.750     |
| Parkinsonian Disorders                |                                    | C10.228.662.600             |
| Parkinson Disease                     |                                    | C10.574.812                 |
| Alzheimer Disease                     |                                    | C10.574.945.249             |
| Restless Leg Syndrome                 |                                    | C10.803                     |
| Male Urogenital Diseases              | Prostatic Hyperplasia              | C12.294.565.500             |
|                                       | Diabetic Nephropathies             | C12.777.419.192             |
|                                       | Urinary Bladder, Overactive        | C12.777.829.866             |

Table S1.8: MeSH Terms Applied to clinicaltrials.gov database

| Category                            | MeSH term                                                  | Code                    |
|-------------------------------------|------------------------------------------------------------|-------------------------|
| Female Urogenital Diseases          | Enuresis                                                   | C12.777.934.284         |
|                                     | Urinary Incontinence                                       | C12.777.934.852         |
|                                     | Urinary Bladder, Overactive                                | C13.351.968.829.813     |
| Cardiovascular Diseases             | Enuresis                                                   | C13.351.968.934.252     |
|                                     | Urinary Incontinence                                       | C13.351.968.934.814     |
|                                     | Atrial Fibrillation                                        | C14.280.067.198         |
|                                     | Atrial Flutter                                             | C14.280.067.248         |
|                                     | Heart Failure                                              | C14.280.434             |
|                                     | Myocardial Ischaemia                                       | C14.280.647             |
|                                     | Atherosclerosis                                            | C14.907.137.126.307     |
|                                     | Peripheral Arterial Disease                                | C14.907.137.126.307.500 |
|                                     | Coronary Artery Disease                                    | C14.907.137.126.339     |
|                                     | Dementia, Vascular                                         | C14.907.137.126.372.500 |
|                                     | Intermittent Claudication                                  | C14.907.137.126.669     |
|                                     | Cerebral Infarction                                        | C14.907.253.092.477.200 |
|                                     | Dementia, Vascular                                         | C14.907.253.560.350.500 |
|                                     | Stroke                                                     | C14.907.253.855         |
|                                     | Embolism and Thrombosis                                    | C14.907.355             |
|                                     | Pulmonary Embolism                                         | C14.907.355.350.700     |
|                                     | Thromboembolism                                            | C14.907.355.590         |
|                                     | Thrombosis                                                 | C14.907.355.830         |
|                                     | Hypertension                                               | C14.907.489             |
| Myocardial Ischaemia                | C14.907.585                                                |                         |
| Peripheral Vascular Diseases        | C14.907.617                                                |                         |
| Skin and Connective Tissue Diseases | Lupus Erythematosus, Systemic                              | C17.300.480             |
|                                     | Mixed Connective Tissue Disease                            | C17.300.540             |
|                                     | Rheumatic Diseases                                         | C17.300.775             |
|                                     | Scleroderma, Systemic                                      | C17.300.799             |
|                                     | Scleroderma, Systemic                                      | C17.800.784             |
|                                     | Scleroderma, Diffuse                                       | C17.800.784.602         |
|                                     | Scleroderma, Limited                                       | C17.800.784.801         |
|                                     | CREST Syndrome                                             | C17.800.784.801.500     |
|                                     | Psoriasis                                                  | C17.800.859.675         |
|                                     | Urticaria                                                  | C17.800.862.945         |
|                                     | Nutritional and Metabolic Diseases                         | Diabetes Mellitus       |
| Hypercholesterolaemia               |                                                            | C18.452.584.500.500.396 |
| Hyperlipidaemia, Familial Combined  |                                                            | C18.452.584.500.500.438 |
| Hypertriglyceridaemia               |                                                            | C18.452.584.500.500.851 |
| Hyperlipidaemia, Familial Combined  |                                                            | C18.452.648.398.450     |
| Endocrine System Diseases           | Diabetes Mellitus, Type 1                                  | C19.246.267             |
|                                     | Diabetes Mellitus, Type 2                                  | C19.246.300             |
| Immune System Diseases              | Anti-Neutrophil Cytoplasmic Antibody-Associated Vasculitis | C20.111.193             |
|                                     | Antiphospholipid Syndrome                                  | C20.111.197             |
|                                     | Arthritis, Juvenile                                        | C20.111.198             |
|                                     | Arthritis, Rheumatoid                                      | C20.111.199             |
|                                     | Multiple Sclerosis                                         | C20.111.258.250.500     |
|                                     | Diabetes Mellitus, Type 1                                  | C20.111.327             |
|                                     | Hepatitis, Autoimmune                                      | C20.111.567             |

Table S1.8: MeSH Terms Applied to clinicaltrials.gov database

| Category | MeSH term          | Code                |
|----------|--------------------|---------------------|
|          | Asthma             | C20.543.480.680.095 |
|          | Rhinitis, Allergic | C20.543.480.680.443 |

Six repository trials were not found in the CTG register (Table S1.9). Of these, the trials which were ineligible were excluded from the repository set. Those with clerical errors only were retained. This resulted in 197 eligible trials in the CSDR repository, 9 trials in the NIH repository, and 38 trials in the YODA repository.

Table S1.9: Excluded repository trials following initial CTG search

| Trial ID            | Reason                                                     | Type of reason |
|---------------------|------------------------------------------------------------|----------------|
| BioLINCCNCT00786474 | No selected MESH condition listed                          | Ineligible     |
| CSDR NCT00240435    | Listed as device comparison (tiotropium versus tiotropium) | Ineligible     |
| CSDR NCT00239473    | Listed as device comparison (tiotropium versus tiotropium) | Ineligible     |
| CSDR NCT00348309    | Phase not recorded on CTG (was Phase 3)                    | Clerical error |
| YODA NCT00096655    | Erroneously states 'accepts healthy volunteers'            | Clerical error |
| YODA NCT00236028    | Missing primary completion date                            | Clerical error |

## 1.5.2 Specific interventions

Eligible drugs were those which belonged to a defined set of relevant WHO ATC classes and which were not-topical, and had not been withdrawn or discontinued.

To identify drugs from text strings, we matched the strings for interventions to the RxNorm metathesaurus and Pubchem. For strings where there was no match, we used manual review to assign a name. We then assigned each of the normalized drug names to a WHO ATC class. Drugs were assigned to one or more 7-character ATC-class uniquely identifying each drug. Where a drug did not yet have any ATC-code, the drug was assigned to the closest 5-character ATC class, and a 2-character alphanumeric code was appended to make a new 7-character code. Where interventions were defined in the trial only as a drug-class (eg a trial of ACE-inhibitor therapy) a WHO ATC code for the most specific class was assigned.

Any drug with a 7-character code starting with any of the following 3, 4, and 5-character ATC codes was defined as relevant:- A02A, A02AC, A02BA, A02BC, A02BX, A10AB, A10AC, A10AD, A10AE, A10BA, A10BB, A10BF, A10BG, A10BH, A10BJ, A10BK, A10BX, B01AA, B01AB, B01AC, B01AD, B01AE, B01AF, B01AX, C01AA, C01BA, C01BB, C01BC, C01BD, C01BG, C01CA, C01CE, C01CX, C01DA, C01DX, C01EA, C01EB, C02AA, C02AB, C02AC, C02CA, C02DB, C02DD, C02KX, C03, C03AA, C03BA, C03BD, C03CA, C03DA, C03DB, C03XA, C04AC, C04AD, C05AA, C05AB, C05AD, C05AE, C05BA, C07AA, C07AB, C07AG, C08, C08CA, C08DA, C08DB, C09AA, C09CA, C09DB, C09XA, C10AA, C10AB, C10AC, C10AD, C10AX, G04BD, G04BE, G04CA, G04CB, H05AA, H05BX, L01AA, L01BA, L01BB, L01BC, L01CD, L01XC, L01XE, L01XX, L04AA, L04AB, L04AC, L04AD, L04AX, M01AB, M01AC, M01AE, M01AH, M01AX, M04AA, M04AB, M04AC, M05BA, M05BX, N03AA, N03AB, N03AF, N03AG, N03AX, N04AA, N04BA, N04BC, N04BD, N04BX, N06DA, N06DX, R03AA, R03AC, R03BA, R03BB, R03CA, R03CC, R03DA, R03DC, R03DX. Secondly, any intervention assigned to a drug-class with a code exactly matching the following codes was defined as relevant:- A02A, A02B, A10A, A10B, A10BA, A10BB, A10BF, A10BG, A10BH, A10BJ, A10BK, A10BX, B01A, B01AB, B01AD, C01B, C02, C03A, C03AA, C03CA, C07A, C08, C09A, C09AA, C09CA, C10A, C10AA, L04AB, M01A, M01AE, N03A, N04BD, R03AC, R03BA, R03BB, R06A.

Using the normalized names, we used a combination of string comparison functions and manual review to restrict the set of trials to those where one or more arm-comparison compared eligible drugs (or classes), or compared an eligible drug to either placebo, usual-care or a "standard comparator".

Especially for later records, clinicaltrials.gov provided information on the study arm for each intervention. However, for most earlier records and some later records the arm in which each drug was used was not specified. As such, these two types of record were examined separately, resulting in a number of trials being excluded (Table S1.10).

Table S1.10: Trial exclusions on basis of drug comparisons

|                                           | No arm-specific information | Arm specific information | Total |
|-------------------------------------------|-----------------------------|--------------------------|-------|
| All                                       | 973                         | 2902                     | 3875  |
| Exclude trials with same-drug comparisons | 973                         | 2469                     | 3442  |
| Exclude topical                           | 947                         | 2361                     | 3308  |
| Exclude discontinued                      | 888                         | 2310                     | 3198  |
| Exclude not selected                      | 721                         | 1949                     | 2670  |

These exclusions included 22 repository trial exclusions (Table S1.11). 18 CSDR, 2 YODA and 2 BioLINCC trials were excluded. Three of these trials were wrongly excluded (first two rows in Table 10) and so have been retained in the set of trials (Biolincc- NCT00000560, CSDR - NCT00428090 and YODA- NCT00973479).

Table S1.11: Repository trials excluded on basis of drug comparisons

| Reason Excluded                                                            | Trials |
|----------------------------------------------------------------------------|--------|
| Mislabeled name                                                            | 1      |
| Wrongly identified as same drug comparison – included open label extension | 2      |
| Discontinued                                                               | 1      |
| No relevant drug compared based on WHO ATC code                            | 1      |
| Same drug all arms                                                         | 11     |
| Topical                                                                    | 5      |
| Withdrawal study                                                           | 1      |

### 1.5.3 Enrollment

Of the 2670 trials the following was found regarding enrollment. Note that for more recently registered trials, those with fewer than 300 participants have already been excluded. Enrollment data was not recorded in a relevant CTG controlled field for 21 trials, and could not be located at all (in any of free text fields in clinicaltrials.gov, listed related publications, or on searching pubmed and google for the clinical trial ID) for an additional 17 trials. In total, 418 trials included fewer than 300 participants. None of the repository trials had missing enrollment data or fewer than 300 participants.

## 1.6 Final set of denominator trials

This left a final “denominator” dataset of 2235 clinical trials (Table: 1.12), and a final repository dataset of 225 trials. The following Table provides a summary of the number of trials at each stage

Table S1.12: Final denominator set of trials

|                                                                              | CSDR | YODA | NIH | Total repository | Total registry |
|------------------------------------------------------------------------------|------|------|-----|------------------|----------------|
| Initial set of trials                                                        | 199  | 38   | 10  | 247              |                |
| Start date, phase, enrolment, age, design, conditions, broad indication type | 197  | 38   | 9   | 244              | 3872           |
| Ineligible drugs                                                             | 180  | 37   | 8   | 225              | 2670           |
| Less than 300 participants                                                   | 180  | 37   | 8   | 225              | 2235           |

### 1.7 Final set of numerator trials

Of the IPD trials listed above, 96 had been provided by CSDR, 37 by YODA and 8 by NIH at the time of this analysis. All of the YODA trials, none of the NIH trials and 87 of the CSDR trials included data on comorbid diseases which allowed us to conduct these analyses. Of the 9 CSDR trials which did not have data on comorbidity, 5 trials from a single sponsor redacted all concomitant medication data and the remaining 4 trials (where the indication was myocardial infarction) only recorded cardiometabolic drugs. This left a total of 124 trials.

Three of these trials which were for Chronic Idiopathic Urticaria (NCT01264939, NCT01287117 and NCT01292473) which was a condition we could not detect in the primary care data. One trial was examining the use of anticoagulant medication to prevent thromboembolic disease for “solid tumour” (NCT00694382). We excluded this as it was not clear how it should be identified using READ codes. One further trial was excluded as the indication was chronic allergic rhinitis (NCT00694382), which we felt would be difficult to distinguish from seasonal allergic rhinitis in the primary care data. This left 119 trials.

A further 3 trials (2 trials for thromboprophylaxis post arthroplasty of the knee and 1 post arthroplasty of the hip) were excluded from the final comparison. This was because, for a comorbidity count, prescribing patterns in the pre- or post- operative period may not accurately reflect long-term management of comorbidities. This left a total of 116 trials for the final comparison.

[Next](#)
