# Supplementary material for: Representation of people with comorbidity and multimorbidity in clinical trials of novel drug therapies: an individual-level participant data analysis
Source: PubMed Central journal article supplement (PMC6849229; doi:10.1186/s12916-019-1427-1), 2019-11-12
Supplement: 12916_2019_1427_MOESM2_ESM.pdf [file 12916_2019_1427_MOESM2_ESM.pdf]

## 2 Representativeness of community data (SAIL)

The following tables (Tables 2.1, 2.2 and 2.3) examine the representativeness of SAIL by comparing age, sex and socio-economic status between SAIL and non-SAIL primary care practices.

### 2.1 Sex

| Table S2.1: Proportion of men and women in all Wales primary care practices, and SAIL primary care practices |                 |                 |                    |
|--------------------------------------------------------------------------------------------------------------|-----------------|-----------------|--------------------|
| Sex                                                                                                          | All practices   | SAIL practices  | Non-SAIL practices |
| Male                                                                                                         | 1640340 (49.9%) | 1300625 (49.9%) | 339715 (50.0%)     |
| Female                                                                                                       | 1646863 (50.1%) | 1307793 (50.1%) | 339070 (50.0%)     |

### 2.2 Age

| Table S2.2: Proportion of different ages in all Wales primary care practices, and SAIL primary care practices |                 |                 |                    |
|---------------------------------------------------------------------------------------------------------------|-----------------|-----------------|--------------------|
| Age (years)                                                                                                   | All practices   | SAIL practices  | Non-SAIL practices |
| 0 to 17                                                                                                       | 662165 (20.1%)  | 527491 (20.2%)  | 134674 (19.8%)     |
| 18 to 64                                                                                                      | 1981499 (60.3%) | 1579351 (60.5%) | 402148 (59.2%)     |
| 65 plus                                                                                                       | 643544 (19.6%)  | 501579 (19.2%)  | 141965 (20.9%)     |

### 2.3 Socio-economic status

| Table S2.3: Proportion of people of different ages in all Wales primary care practices, and SAIL primary care practices |                |                |                    |
|-------------------------------------------------------------------------------------------------------------------------|----------------|----------------|--------------------|
| Socio-economic deprivation (quintiles)                                                                                  | All practices  | SAIL practices | Non-SAIL practices |
| Q1                                                                                                                      | 627368 (19.1%) | 529430 (20.3%) | 97938 (14.4%)      |
| Q2                                                                                                                      | 613593 (18.7%) | 483424 (18.5%) | 130169 (19.2%)     |
| Q3                                                                                                                      | 612592 (18.6%) | 489567 (18.8%) | 123025 (18.1%)     |
| Q4                                                                                                                      | 582833 (17.7%) | 422413 (16.2%) | 160420 (23.6%)     |
| Q5                                                                                                                      | 595508 (18.1%) | 485554 (18.6%) | 109954 (16.2%)     |
| Missing                                                                                                                 | 255314 (7.8%)  | 198033 (7.6%)  | 57281 (8.4%)       |
