# Supplementary material for: Representation of people with comorbidity and multimorbidity in clinical trials of novel drug therapies: an individual-level participant data analysis
Source: PubMed Central journal article supplement (PMC6849229; doi:10.1186/s12916-019-1427-1), 2019-11-12
Supplement: 12916_2019_1427_MOESM3_ESM.pdf [file 12916_2019_1427_MOESM3_ESM.pdf]

# 3 Selection of patients and participants from Primary Care data - READ codes

## 3.1 Primary care

For primary care data, READ codes were used to identify conditions matching the trial indications. READ codes are shown in Table S3.1. There are 50 rows in the cars dataframe.

Table S3.1: Primary care READ codes used to identify patients with trial indications

| Condition              | Read.code | Description                                               | condition_rename    |
|------------------------|-----------|-----------------------------------------------------------|---------------------|
| Dementia (Alzheimer's) | Eu00.     | [X]Dementia in Alzheimer's disease                        | Alzheimer's Disease |
| Dementia (Alzheimer's) | Eu000     | [X]Dementia in Alzheimer's disease with early onset       | Alzheimer's Disease |
| Dementia (Alzheimer's) | Eu001     | [X]Dementia in Alzheimer's disease with late onset        | Alzheimer's Disease |
| Dementia (Alzheimer's) | Eu002     | [X]Dementia in Alzheimer's dis, atypical or mixed type    | Alzheimer's Disease |
| Dementia (Alzheimer's) | Eu00z     | [X]Dementia in Alzheimer's disease, unspecified           | Alzheimer's Disease |
| Dementia (Alzheimer's) | F110.     | Alzheimer's disease                                       | Alzheimer's Disease |
| Dementia (Alzheimer's) | F1100     | Alzheimer's disease with early onset                      | Alzheimer's Disease |
| Dementia (Alzheimer's) | F1101     | Alzheimer's disease with late onset                       | Alzheimer's Disease |
| Dementia (Alzheimer's) | Fyu30     | [X]Other Alzheimer's disease                              | Alzheimer's Disease |
| Asthma                 | 173A.     | Exercise induced asthma                                   | Asthma              |
| Asthma                 | 173c.     | Occupational asthma                                       | Asthma              |
| Asthma                 | 173d.     | Work aggravated asthma                                    | Asthma              |
| Asthma                 | 1780.     | Aspirin induced asthma                                    | Asthma              |
| Asthma                 | 1O2..     | Asthma confirmed                                          | Asthma              |
| Asthma                 | 663d.     | Emergency asthma admission since last appointment         | Asthma              |
| Asthma                 | 663e.     | Asthma restricts exercise                                 | Asthma              |
| Asthma                 | 663e0     | Asthma sometimes restricts exercise                       | Asthma              |
| Asthma                 | 663e1     | Asthma severely restricts exercise                        | Asthma              |
| Asthma                 | 663f.     | Asthma never restricts exercise                           | Asthma              |
| Asthma                 | 663h.     | Asthma - currently dormant                                | Asthma              |
| Asthma                 | 663j.     | Asthma - currently active                                 | Asthma              |
| Asthma                 | 663m.     | Asthma accident and emergency attendance since last visit | Asthma              |
| Asthma                 | 663n.     | Asthma treatment compliance satisfactory                  | Asthma              |
| Asthma                 | 663N.     | Asthma disturbing sleep                                   | Asthma              |
| Asthma                 | 663N0     | Asthma causing night waking                               | Asthma              |
| Asthma                 | 663N1     | Asthma disturbs sleep weekly                              | Asthma              |
| Asthma                 | 663N2     | Asthma disturbs sleep frequently                          | Asthma              |
| Asthma                 | 663O.     | Asthma not disturbing sleep                               | Asthma              |

Table S3.1: Primary care READ codes used to identify patients with trial indications

| <b>Condition</b> | <b>Read.code</b> | <b>Description</b>                                    | <b>condition_rename</b> |
|------------------|------------------|-------------------------------------------------------|-------------------------|
| Asthma           | 663O0            | Asthma never disturbs sleep                           | Asthma                  |
| Asthma           | 663p.            | Asthma treatment compliance unsatisfactory            | Asthma                  |
| Asthma           | 663P.            | Asthma limiting activities                            | Asthma                  |
| Asthma           | 663q.            | Asthma daytime symptoms                               | Asthma                  |
| Asthma           | 663Q.            | Asthma not limiting activities                        | Asthma                  |
| Asthma           | 663r.            | Asthma causes night symptoms 1 to 2 times per month   | Asthma                  |
| Asthma           | 663s.            | Asthma never causes daytime symptoms                  | Asthma                  |
| Asthma           | 663t.            | Asthma causes daytime symptoms 1 to 2 times per month | Asthma                  |
| Asthma           | 663u.            | Asthma causes daytime symptoms 1 to 2 times per week  | Asthma                  |
| Asthma           | 663U.            | Asthma management plan given                          | Asthma                  |
| Asthma           | 663v.            | Asthma causes daytime symptoms most days              | Asthma                  |
| Asthma           | 663V.            | Asthma severity                                       | Asthma                  |
| Asthma           | 663P.            | Asthma limiting activities                            | Asthma                  |
| Asthma           | 663q.            | Asthma daytime symptoms                               | Asthma                  |
| Asthma           | 663r.            | Asthma causes night symptoms 1 to 2 times per month   | Asthma                  |
| Asthma           | 663u.            | Asthma causes daytime symptoms 1 to 2 times per week  | Asthma                  |
| Asthma           | 663v.            | Asthma causes daytime symptoms most days              | Asthma                  |
| Asthma           | 663V0            | Occasional asthma                                     | Asthma                  |
| Asthma           | 663V1            | Mild asthma                                           | Asthma                  |
| Asthma           | 663V2            | Moderate asthma                                       | Asthma                  |
| Asthma           | 663V3            | Severe asthma                                         | Asthma                  |
| Asthma           | 663w.            | Asthma limits walking up hills or stairs              | Asthma                  |
| Asthma           | 663W.            | Asthma prophylactic medication used                   | Asthma                  |
| Asthma           | 663x.            | Asthma limits walking on the flat                     | Asthma                  |
| Asthma           | 663y.            | Number of asthma exacerbations in past year           | Asthma                  |
| Asthma           | 66Y5.            | Change in asthma management plan                      | Asthma                  |
| Asthma           | 66Y9.            | Step up change in asthma management plan              | Asthma                  |
| Asthma           | 66YA.            | Step down change in asthma management plan            | Asthma                  |
| Asthma           | 66YC.            | Absent from work or school due to asthma              | Asthma                  |
| Asthma           | 66YE.            | Asthma monitoring due                                 | Asthma                  |
| Asthma           | 66YJ.            | Asthma annual review                                  | Asthma                  |
| Asthma           | 66YK.            | Asthma follow-up                                      | Asthma                  |
| Asthma           | 66YP.            | Asthma night-time symptoms                            | Asthma                  |
| Asthma           | 66YQ.            | Asthma monitoring by nurse                            | Asthma                  |
| Asthma           | 66YR.            | Asthma monitoring by doctor                           | Asthma                  |
| Asthma           | 8793.            | Asthma control step 0                                 | Asthma                  |
| Asthma           | 8794.            | Asthma control step 1                                 | Asthma                  |
| Asthma           | 8795.            | Asthma control step 2                                 | Asthma                  |
| Asthma           | 8796.            | Asthma control step 3                                 | Asthma                  |
| Asthma           | 8797.            | Asthma control step 4                                 | Asthma                  |

Table S3.1: Primary care READ codes used to identify patients with trial indications

| <b>Condition</b>             | <b>Read.code</b> | <b>Description</b>                                     | <b>condition_rename</b>      |
|------------------------------|------------------|--------------------------------------------------------|------------------------------|
| Asthma                       | 8798.            | Asthma control step 5                                  | Asthma                       |
| Asthma                       | 8B3j.            | Asthma medication review                               | Asthma                       |
| Asthma                       | 8CR0.            | Asthma clinical management plan                        | Asthma                       |
| Asthma                       | 8791.            | Further asthma - drug prevent.                         | Asthma                       |
| Asthma                       | 9hA..            | Exception reporting: asthma quality indicators         | Asthma                       |
| Asthma                       | H3120            | Chronic asthmatic bronchitis                           | Asthma                       |
| Asthma                       | H33..            | Asthma                                                 | Asthma                       |
| Asthma                       | H330.            | Extrinsic (atopic) asthma                              | Asthma                       |
| Asthma                       | H3300            | Extrinsic asthma without status asthmaticus            | Asthma                       |
| Asthma                       | H3301            | Extrinsic asthma with status asthmaticus               | Asthma                       |
| Asthma                       | H330z            | Extrinsic asthma NOS                                   | Asthma                       |
| Asthma                       | H331.            | Intrinsic asthma                                       | Asthma                       |
| Asthma                       | H3310            | Intrinsic asthma without status asthmaticus            | Asthma                       |
| Asthma                       | H3311            | Intrinsic asthma with status asthmaticus               | Asthma                       |
| Asthma                       | H331z            | Intrinsic asthma NOS                                   | Asthma                       |
| Asthma                       | H332.            | Mixed asthma                                           | Asthma                       |
| Asthma                       | H333.            | Acute exacerbation of asthma                           | Asthma                       |
| Asthma                       | H334.            | Brittle asthma                                         | Asthma                       |
| Asthma                       | H33z.            | Asthma unspecified                                     | Asthma                       |
| Asthma                       | H33z0            | Status asthmaticus NOS                                 | Asthma                       |
| Asthma                       | H33z1            | Asthma attack                                          | Asthma                       |
| Asthma                       | H33z2            | Late-onset asthma                                      | Asthma                       |
| Asthma                       | H33zz            | Asthma NOS                                             | Asthma                       |
| Asthma                       | H35y6            | Sequoiosis (red-cedar asthma)                          | Asthma                       |
| Asthma                       | H35y7            | Wood asthma                                            | Asthma                       |
| Asthma                       | H47y0            | Detergent asthma                                       | Asthma                       |
| Atrial fibrillation          | 14AN.            | H/O: atrial fibrillation                               | Atrial Fibrillation          |
| Atrial fibrillation          | 3272.            | ECG: atrial fibrillation                               | Atrial Fibrillation          |
| Atrial fibrillation          | 662S.            | Atrial fibrillation monitoring                         | Atrial Fibrillation          |
| Atrial fibrillation          | 6A9..            | Atrial fibrillation annual review                      | Atrial Fibrillation          |
| Atrial fibrillation          | G573.            | Atrial fibrillation and flutter                        | Atrial Fibrillation          |
| Atrial fibrillation          | G5730            | Atrial fibrillation                                    | Atrial Fibrillation          |
| Atrial fibrillation          | G5732            | Paroxysmal atrial fibrillation                         | Atrial Fibrillation          |
| Atrial fibrillation          | G5733            | Non-rheumatic atrial fibrillation                      | Atrial Fibrillation          |
| Atrial fibrillation          | G5734            | Permanent atrial fibrillation                          | Atrial Fibrillation          |
| Atrial fibrillation          | G5735            | Persistent atrial fibrillation                         | Atrial Fibrillation          |
| Atrial fibrillation          | G573z            | Atrial fibrillation and flutter NOS                    | Atrial Fibrillation          |
| Axial spondyloarthritis      | XabRZ            | Axial spondyloarthritis                                | Axial Spondyloarthritis      |
| Axial spondyloarthritis      | N100.            | Ankylosing spondylitis                                 | Axial Spondyloarthritis      |
| Axial spondyloarthritis      | X7023            | Ankylosing spondylitis with organ / system involvement | Axial Spondyloarthritis      |
| Axial spondyloarthritis      | X7024            | Ankylosing spondylitis with multisystem involvement    | Axial Spondyloarthritis      |
| Axial spondyloarthritis      | X701x            | Juvenile ankylosing spondylitis                        | Axial Spondyloarthritis      |
| Benign prostatic hyperplasia | K20..            | Benign prostatic hypertrophy                           | Benign Prostatic Hyperplasia |
| Benign prostatic hyperplasia | K200.            | Prostatic hyperplasia unspecified                      | Benign Prostatic Hyperplasia |

Table S3.1: Primary care READ codes used to identify patients with trial indications

| <b>Condition</b>             | <b>Read.code</b> | <b>Description</b>                                           | <b>condition_rename</b>      |
|------------------------------|------------------|--------------------------------------------------------------|------------------------------|
| Benign prostatic hyperplasia | K201.            | Prostatic hyperplasia of the lateral lobe                    | Benign Prostatic Hyperplasia |
| Benign prostatic hyperplasia | K202.            | Prostatic hyperplasia of the medial lobe                     | Benign Prostatic Hyperplasia |
| Benign prostatic hyperplasia | K20z.            | Prostatic hyperplasia NOS                                    | Benign Prostatic Hyperplasia |
| Diabetes Mellitus, Type 2    | 66A3.            | Diabetic on diet only                                        | Diabetes Mellitus, Type 2    |
| Diabetes Mellitus, Type 2    | 66A4.            | Diabetic on oral treatment                                   | Diabetes Mellitus, Type 2    |
| Diabetes Mellitus, Type 2    | 66Ao.            | Diabetes type 2 review                                       | Diabetes Mellitus, Type 2    |
| Diabetes Mellitus, Type 2    | C1074            | NIDDM with peripheral circulatory disorder                   | Diabetes Mellitus, Type 2    |
| Diabetes Mellitus, Type 2    | C109.            | Non-insulin dependent diabetes mellitus                      | Diabetes Mellitus, Type 2    |
| Diabetes Mellitus, Type 2    | C1090            | Non-insulin-dependent diabetes mellitus with renal comps     | Diabetes Mellitus, Type 2    |
| Diabetes Mellitus, Type 2    | C1091            | Non-insulin-dependent diabetes mellitus with ophthalm comps  | Diabetes Mellitus, Type 2    |
| Diabetes Mellitus, Type 2    | C1092            | Non-insulin-dependent diabetes mellitus with neuro comps     | Diabetes Mellitus, Type 2    |
| Diabetes Mellitus, Type 2    | C1093            | Non-insulin-dependent diabetes mellitus with multiple comps  | Diabetes Mellitus, Type 2    |
| Diabetes Mellitus, Type 2    | C1094            | Non-insulin dependent diabetes mellitus with ulcer           | Diabetes Mellitus, Type 2    |
| Diabetes Mellitus, Type 2    | C1095            | Non-insulin dependent diabetes mellitus with gangrene        | Diabetes Mellitus, Type 2    |
| Diabetes Mellitus, Type 2    | C1096            | Non-insulin-dependent diabetes mellitus with retinopathy     | Diabetes Mellitus, Type 2    |
| Diabetes Mellitus, Type 2    | C1097            | Non-insulin dependent diabetes mellitus - poor control       | Diabetes Mellitus, Type 2    |
| Diabetes Mellitus, Type 2    | C1099            | Non-insulin-dependent diabetes mellitus without complication | Diabetes Mellitus, Type 2    |
| Diabetes Mellitus, Type 2    | C109A            | Non-insulin dependent diabetes mellitus with mononeuropathy  | Diabetes Mellitus, Type 2    |
| Diabetes Mellitus, Type 2    | C109B            | Non-insulin dependent diabetes mellitus with polyneuropathy  | Diabetes Mellitus, Type 2    |
| Diabetes Mellitus, Type 2    | C109C            | Non-insulin dependent diabetes mellitus with nephropathy     | Diabetes Mellitus, Type 2    |
| Diabetes Mellitus, Type 2    | C109D            | Non-insulin dependent diabetes mellitus with hypoglyca coma  | Diabetes Mellitus, Type 2    |
| Diabetes Mellitus, Type 2    | C109E            | Non-insulin depend diabetes mellitus with diabetic cataract  | Diabetes Mellitus, Type 2    |
| Diabetes Mellitus, Type 2    | C109F            | Non-insulin-dependent d m with peripheral angiopath          | Diabetes Mellitus, Type 2    |
| Diabetes Mellitus, Type 2    | C109G            | Non-insulin dependent diabetes mellitus with arthropathy     | Diabetes Mellitus, Type 2    |
| Diabetes Mellitus, Type 2    | C109H            | Non-insulin dependent d m with neuropathic arthropathy       | Diabetes Mellitus, Type 2    |
| Diabetes Mellitus, Type 2    | C109J            | Insulin treated Type 2 diabetes mellitus                     | Diabetes Mellitus, Type 2    |
| Diabetes Mellitus,           | C109K            | Hyperosmolar non-ketotic state in type                       | Diabetes Mellitus, Type      |

Table S3.1: Primary care READ codes used to identify patients with trial indications

| <b>Condition</b>          | <b>Read.code</b> | <b>Description</b>                                         | <b>condition_rename</b>   |
|---------------------------|------------------|------------------------------------------------------------|---------------------------|
| Type 2                    |                  | 2 diabetes mellitus                                        | 2                         |
| Diabetes Mellitus, Type 2 | C10F.            | Type 2 diabetes mellitus                                   | Diabetes Mellitus, Type 2 |
| Diabetes Mellitus, Type 2 | C10F0            | Type 2 diabetes mellitus with renal complications          | Diabetes Mellitus, Type 2 |
| Diabetes Mellitus, Type 2 | C10F1            | Type 2 diabetes mellitus with ophthalmic complications     | Diabetes Mellitus, Type 2 |
| Diabetes Mellitus, Type 2 | C10F2            | Type 2 diabetes mellitus with neurological complications   | Diabetes Mellitus, Type 2 |
| Diabetes Mellitus, Type 2 | C10F3            | Type 2 diabetes mellitus with multiple complications       | Diabetes Mellitus, Type 2 |
| Diabetes Mellitus, Type 2 | C10F4            | Type 2 diabetes mellitus with ulcer                        | Diabetes Mellitus, Type 2 |
| Diabetes Mellitus, Type 2 | C10F5            | Type 2 diabetes mellitus with gangrene                     | Diabetes Mellitus, Type 2 |
| Diabetes Mellitus, Type 2 | C10F6            | Type 2 diabetes mellitus with retinopathy                  | Diabetes Mellitus, Type 2 |
| Diabetes Mellitus, Type 2 | C10F7            | Type 2 diabetes mellitus - poor control                    | Diabetes Mellitus, Type 2 |
| Diabetes Mellitus, Type 2 | C10F9            | Type 2 diabetes mellitus without complication              | Diabetes Mellitus, Type 2 |
| Diabetes Mellitus, Type 2 | C10FA            | Type 2 diabetes mellitus with mononeuropathy               | Diabetes Mellitus, Type 2 |
| Diabetes Mellitus, Type 2 | C10FB            | Type 2 diabetes mellitus with polyneuropathy               | Diabetes Mellitus, Type 2 |
| Diabetes Mellitus, Type 2 | C10FC            | Type 2 diabetes mellitus with nephropathy                  | Diabetes Mellitus, Type 2 |
| Diabetes Mellitus, Type 2 | C10FD            | Type 2 diabetes mellitus with hypoglycaemic coma           | Diabetes Mellitus, Type 2 |
| Diabetes Mellitus, Type 2 | C10FE            | Type 2 diabetes mellitus with diabetic cataract            | Diabetes Mellitus, Type 2 |
| Diabetes Mellitus, Type 2 | C10FF            | Type 2 diabetes mellitus with peripheral angiopathy        | Diabetes Mellitus, Type 2 |
| Diabetes Mellitus, Type 2 | C10FG            | Type 2 diabetes mellitus with arthropathy                  | Diabetes Mellitus, Type 2 |
| Diabetes Mellitus, Type 2 | C10FH            | Type 2 diabetes mellitus with neuropathic arthropathy      | Diabetes Mellitus, Type 2 |
| Diabetes Mellitus, Type 2 | C10FJ            | Insulin treated Type 2 diabetes mellitus                   | Diabetes Mellitus, Type 2 |
| Diabetes Mellitus, Type 2 | C10FK            | Hyperosmolar non-ketotic state in type 2 diabetes mellitus | Diabetes Mellitus, Type 2 |
| Diabetes Mellitus, Type 2 | C10FL            | Type 2 diabetes mellitus with persistent proteinuria       | Diabetes Mellitus, Type 2 |
| Diabetes Mellitus, Type 2 | C10FM            | Type 2 diabetes mellitus with persistent microalbuminuria  | Diabetes Mellitus, Type 2 |
| Diabetes Mellitus, Type 2 | C10FN            | Type 2 diabetes mellitus with ketoacidosis                 | Diabetes Mellitus, Type 2 |
| Diabetes Mellitus, Type 2 | C10FP            | Type 2 diabetes mellitus with ketoacidotic coma            | Diabetes Mellitus, Type 2 |
| Diabetes Mellitus, Type 2 | C10FQ            | Type 2 diabetes mellitus with exudative maculopathy        | Diabetes Mellitus, Type 2 |
| Diabetes Mellitus, Type 2 | C10FR            | Type 2 diabetes mellitus with gastroparesis                | Diabetes Mellitus, Type 2 |

Table S3.1: Primary care READ codes used to identify patients with trial indications

| <b>Condition</b>     | <b>Read.code</b> | <b>Description</b>                                    | <b>condition_rename</b> |
|----------------------|------------------|-------------------------------------------------------|-------------------------|
| Erectile dysfunction | E2273            | Erectile dysfunction                                  | Erectile dysfunction    |
| Erectile dysfunction | Xaa8r            | Erectile dysfunction due to diabetes mellitus         | Erectile dysfunction    |
| Erectile dysfunction | X400F            | Drug-induced impotence                                | Erectile dysfunction    |
| Erectile dysfunction | X400G            | Endocrine impotence                                   | Erectile dysfunction    |
| Erectile dysfunction | X400H            | Neuropathic impotence                                 | Erectile dysfunction    |
| Erectile dysfunction | Xa24H            | Arteriopathic impotence                               | Erectile dysfunction    |
| Erectile dysfunction | X400I            | Psychogenic impotence                                 | Erectile dysfunction    |
| Erectile dysfunction | K27y1            | Impotence of organic origin                           | Erectile dysfunction    |
| Erectile dysfunction | XaXgw            | C/O erectile dysfunction                              | Erectile dysfunction    |
| Erectile dysfunction | 7A6G5            | Ligation of penile veins for impotence                | Erectile dysfunction    |
| Erectile dysfunction | X74UL            | Provision of device for impotence                     | Erectile dysfunction    |
| Erectile dysfunction | X74UM            | Provision of penile vacuum constriction device        | Erectile dysfunction    |
| Erectile dysfunction | X74UN            | Provision of penile tension band device               | Erectile dysfunction    |
| Erectile dysfunction | X77IU            | Physiological tests for impotence                     | Erectile dysfunction    |
| Erectile dysfunction | X77IV            | Nocturnal penile tumescence                           | Erectile dysfunction    |
| Erectile dysfunction | X77IW            | Corporeal veno-occlusive function                     | Erectile dysfunction    |
| Erectile dysfunction | X77IX            | Intracavernous injection test using vaso-active agent | Erectile dysfunction    |
| Erectile dysfunction | X71FJ            | Advice on technique for impotence                     | Erectile dysfunction    |
| Erectile dysfunction | X30HR            | Penile revascularisation for impotence                | Erectile dysfunction    |
| Hypertension         | 662G.            | Hypertensive treatm.changed                           | Hypertension            |
| Hypertension         | 662O.            | On treatment for hypertension                         | Hypertension            |
| Hypertension         | 662P.            | Hypertension monitoring                               | Hypertension            |
| Hypertension         | 662q.            | Trial reduction of antihypertensive therapy           | Hypertension            |
| Hypertension         | 662r.            | Trial withdrawal of antihypertensive therapy          | Hypertension            |
| Hypertension         | 8B26.            | Antihypertensive therapy                              | Hypertension            |
| Hypertension         | 8BL0.            | Patient on maximal tolerated antihypertensive therapy | Hypertension            |
| Hypertension         | 8CR4.            | Hypertension clinical management plan                 | Hypertension            |
| Hypertension         | F4042            | Blind hypertensive eye                                | Hypertension            |
| Hypertension         | F4213            | Hypertensive retinopathy                              | Hypertension            |
| Hypertension         | F4504            | Ocular hypertension                                   | Hypertension            |
| Hypertension         | G2...            | Hypertensive disease                                  | Hypertension            |
| Hypertension         | G20..            | Essential hypertension                                | Hypertension            |
| Hypertension         | G200.            | Malignant essential hypertension                      | Hypertension            |
| Hypertension         | G201.            | Benign essential hypertension                         | Hypertension            |
| Hypertension         | G202.            | Systolic hypertension                                 | Hypertension            |
| Hypertension         | G203.            | Diastolic hypertension                                | Hypertension            |
| Hypertension         | G20z.            | Essential hypertension NOS                            | Hypertension            |
| Hypertension         | G21..            | Hypertensive heart disease                            | Hypertension            |
| Hypertension         | G210.            | Malignant hypertensive heart disease                  | Hypertension            |
| Hypertension         | G2100            | Malignant hypertensive heart disease without CCF      | Hypertension            |
| Hypertension         | G2101            | Malignant hypertensive heart disease with CCF         | Hypertension            |
| Hypertension         | G210z            | Malignant hypertensive heart disease NOS              | Hypertension            |

Table S3.1: Primary care READ codes used to identify patients with trial indications

| <b>Condition</b> | <b>Read.code</b> | <b>Description</b>                                          | <b>condition_rename</b> |
|------------------|------------------|-------------------------------------------------------------|-------------------------|
| Hypertension     | G211.            | Benign hypertensive heart disease                           | Hypertension            |
| Hypertension     | G2110            | Benign hypertensive heart disease without CCF               | Hypertension            |
| Hypertension     | G2111            | Benign hypertensive heart disease with CCF                  | Hypertension            |
| Hypertension     | G211z            | Benign hypertensive heart disease NOS                       | Hypertension            |
| Hypertension     | G21z.            | Hypertensive heart disease NOS                              | Hypertension            |
| Hypertension     | G21z0            | Hypertensive heart disease NOS without CCF                  | Hypertension            |
| Hypertension     | G21z1            | Hypertensive heart disease NOS with CCF                     | Hypertension            |
| Hypertension     | G21zz            | Hypertensive heart disease NOS                              | Hypertension            |
| Hypertension     | G22..            | Hypertensive renal disease                                  | Hypertension            |
| Hypertension     | G220.            | Malignant hypertensive renal disease                        | Hypertension            |
| Hypertension     | G221.            | Benign hypertensive renal disease                           | Hypertension            |
| Hypertension     | G222.            | Hypertensive renal disease with renal failure               | Hypertension            |
| Hypertension     | G22z.            | Hypertensive renal disease NOS                              | Hypertension            |
| Hypertension     | G23..            | Hypertensive heart and renal disease                        | Hypertension            |
| Hypertension     | G230.            | Malignant hypertensive heart and renal disease              | Hypertension            |
| Hypertension     | G231.            | Benign hypertensive heart and renal disease                 | Hypertension            |
| Hypertension     | G232.            | Hypertensive heart&renal dis wth (congestive) heart failure | Hypertension            |
| Hypertension     | G233.            | Hypertensive heart and renal disease with renal failure     | Hypertension            |
| Hypertension     | G234.            | Hyperten heart&renal dis+both(congestv)heart and renal fail | Hypertension            |
| Hypertension     | G23z.            | Hypertensive heart and renal disease NOS                    | Hypertension            |
| Hypertension     | G24..            | Secondary hypertension                                      | Hypertension            |
| Hypertension     | G240.            | Secondary malignant hypertension                            | Hypertension            |
| Hypertension     | G2400            | Secondary malignant renovascular hypertension               | Hypertension            |
| Hypertension     | G240z            | Secondary malignant hypertension NOS                        | Hypertension            |
| Hypertension     | G241.            | Secondary benign hypertension                               | Hypertension            |
| Hypertension     | G2410            | Secondary benign renovascular hypertension                  | Hypertension            |
| Hypertension     | G241z            | Secondary benign hypertension NOS                           | Hypertension            |
| Hypertension     | G244.            | Hypertension secondary to endocrine disorders               | Hypertension            |
| Hypertension     | G24z.            | Secondary hypertension NOS                                  | Hypertension            |
| Hypertension     | G24z0            | Secondary renovascular hypertension NOS                     | Hypertension            |
| Hypertension     | G24z1            | Hypertension secondary to drug                              | Hypertension            |
| Hypertension     | G24zz            | Secondary hypertension NOS                                  | Hypertension            |
| Hypertension     | G2y..            | Other specified hypertensive disease                        | Hypertension            |
| Hypertension     | G2z..            | Hypertensive disease NOS                                    | Hypertension            |
| Hypertension     | G672.            | Hypertensive encephalopathy                                 | Hypertension            |
| Hypertension     | Gyu2.            | [X]Hypertensive diseases                                    | Hypertension            |

Table S3.1: Primary care READ codes used to identify patients with trial indications

| <b>Condition</b>           | <b>Read.code</b> | <b>Description</b>                                 | <b>condition_rename</b>    |
|----------------------------|------------------|----------------------------------------------------|----------------------------|
| Hypertension               | Gyu20            | [X]Other secondary hypertension                    | Hypertension               |
| Hypertension               | Gyu21            | [X]Hypertension secondary to other renal disorders | Hypertension               |
| Pulmonary hypertension     | G410.            | Primary pulmonary hypertension                     | Hypertension, Pulmonary    |
| Pulmonary hypertension     | X2036            | Sporadic primary pulmonary hypertension            | Hypertension, Pulmonary    |
| Pulmonary hypertension     | X2037            | Familial primary pulmonary hypertension            | Hypertension, Pulmonary    |
| Inflammatory Bowel disease | 14C4.            | H/O: colitis                                       | Inflammatory bowel disease |
| Inflammatory Bowel disease | J08z9            | Orofacial Crohn's disease                          | Inflammatory bowel disease |
| Inflammatory Bowel disease | J40..            | Regional enteritis - Crohn's disease               | Inflammatory bowel disease |
| Inflammatory Bowel disease | J400.            | Regional enteritis of the small bowel              | Inflammatory bowel disease |
| Inflammatory Bowel disease | J4000            | Regional enteritis of the duodenum                 | Inflammatory bowel disease |
| Inflammatory Bowel disease | J4001            | Regional enteritis of the jejunum                  | Inflammatory bowel disease |
| Inflammatory Bowel disease | J4002            | Crohn's disease of the terminal ileum              | Inflammatory bowel disease |
| Inflammatory Bowel disease | J4003            | Crohn's disease of the ileum unspecified           | Inflammatory bowel disease |
| Inflammatory Bowel disease | J4004            | Crohn's disease of the ileum NOS                   | Inflammatory bowel disease |
| Inflammatory Bowel disease | J4005            | Exacerbation of Crohn's disease of small intestine | Inflammatory bowel disease |
| Inflammatory Bowel disease | J400z            | Crohn's disease of the small bowel NOS             | Inflammatory bowel disease |
| Inflammatory Bowel disease | J401.            | Regional enteritis of the large bowel              | Inflammatory bowel disease |
| Inflammatory Bowel disease | J4010            | Regional enteritis of the colon                    | Inflammatory bowel disease |
| Inflammatory Bowel disease | J4011            | Regional enteritis of the rectum                   | Inflammatory bowel disease |
| Inflammatory Bowel disease | J4012            | Exacerbation of Crohn's disease of large intestine | Inflammatory bowel disease |
| Inflammatory Bowel disease | J401z            | Crohn's disease of the large bowel NOS             | Inflammatory bowel disease |
| Inflammatory Bowel disease | J402.            | Regional ileocolitis                               | Inflammatory bowel disease |
| Inflammatory Bowel disease | J40z.            | Regional enteritis NOS                             | Inflammatory bowel disease |
| Inflammatory Bowel disease | J41..            | Idiopathic proctocolitis                           | Inflammatory bowel disease |
| Inflammatory Bowel disease | J410.            | Ulcerative proctocolitis                           | Inflammatory bowel disease |
| Inflammatory Bowel disease | J4100            | Ulcerative ileocolitis                             | Inflammatory bowel disease |
| Inflammatory Bowel disease | J4101            | Ulcerative colitis                                 | Inflammatory bowel disease |



Table S3.1: Primary care READ codes used to identify patients with trial indications

| <b>Condition</b>           | <b>Read.code</b> | <b>Description</b>                                 | <b>condition_rename</b>    |
|----------------------------|------------------|----------------------------------------------------|----------------------------|
| Inflammatory Bowel disease | J4102            | Ulcerative rectosigmoiditis                        | Inflammatory bowel disease |
| Inflammatory Bowel disease | J4103            | Ulcerative proctitis                               | Inflammatory bowel disease |
| Inflammatory Bowel disease | J4104            | Exacerbation of ulcerative colitis                 | Inflammatory bowel disease |
| Inflammatory Bowel disease | J410z            | Ulcerative proctocolitis NOS                       | Inflammatory bowel disease |
| Inflammatory Bowel disease | J411.            | Ulcerative (chronic) enterocolitis                 | Inflammatory bowel disease |
| Inflammatory Bowel disease | J412.            | Ulcerative (chronic) ileocolitis                   | Inflammatory bowel disease |
| Inflammatory Bowel disease | Jyu40            | [X]Other Crohn's disease                           | Inflammatory bowel disease |
| Inflammatory Bowel disease | Jyu41            | [X]Other ulcerative colitis                        | Inflammatory bowel disease |
| Inflammatory Bowel disease | N0310            | Arthropathy in ulcerative colitis                  | Inflammatory bowel disease |
| Inflammatory Bowel disease | N0454            | Juvenile arthritis in ulcerative colitis           | Inflammatory bowel disease |
| Inflammatory Bowel disease | J08z9            | Orofacial Crohn's disease                          | Inflammatory bowel disease |
| Inflammatory Bowel disease | J40..            | Regional enteritis - Crohn's disease               | Inflammatory bowel disease |
| Inflammatory Bowel disease | J4002            | Crohn's disease of the terminal ileum              | Inflammatory bowel disease |
| Inflammatory Bowel disease | J4003            | Crohn's disease of the ileum unspecified           | Inflammatory bowel disease |
| Inflammatory Bowel disease | J4004            | Crohn's disease of the ileum NOS                   | Inflammatory bowel disease |
| Inflammatory Bowel disease | J4005            | Exacerbation of Crohn's disease of small intestine | Inflammatory bowel disease |
| Inflammatory Bowel disease | J400z            | Crohn's disease of the small bowel NOS             | Inflammatory bowel disease |
| Inflammatory Bowel disease | J4012            | Exacerbation of Crohn's disease of large intestine | Inflammatory bowel disease |
| Inflammatory Bowel disease | J401z            | Crohn's disease of the large bowel NOS             | Inflammatory bowel disease |
| Inflammatory Bowel disease | Jyu40            | [X]Other Crohn's disease                           | Inflammatory bowel disease |
| Inflammatory Bowel disease | N0311            | Arthropathy in Crohn's disease                     | Inflammatory bowel disease |
| Inflammatory Bowel disease | N0453            | Juvenile arthritis in Crohn's disease              | Inflammatory bowel disease |
| Migraine                   | F26..            | Migraine                                           | Migraine                   |
| Migraine                   | XaXkr            | Migraine induced by oestrogen contraceptive        | Migraine                   |
| Migraine                   | F261.            | Migraine without aura                              | Migraine                   |
| Migraine                   | F261z            | Common migraine NOS                                | Migraine                   |
| Migraine                   | F260.            | Migraine with aura                                 | Migraine                   |
| Migraine                   | X007J            | Migraine with typical aura                         | Migraine                   |
| Migraine                   | X007K            | Migraine with prolonged aura                       | Migraine                   |
| Migraine                   | F26y0            | Hemiplegic migraine                                | Migraine                   |

Table S3.1: Primary care READ codes used to identify patients with trial indications

| <b>Condition</b> | <b>Read.code</b> | <b>Description</b>                                         | <b>condition_rename</b> |
|------------------|------------------|------------------------------------------------------------|-------------------------|
| Migraine         | X007L            | Familial hemiplegic migraine                               | Migraine                |
| Migraine         | X007M            | Non-familial hemiplegic migraine                           | Migraine                |
| Migraine         | F2623            | Basilar migraine                                           | Migraine                |
| Migraine         | X007N            | Migraine aura without headache                             | Migraine                |
| Migraine         | F2624            | Ophthalmic migraine                                        | Migraine                |
| Migraine         | F26y1            | Ophthalmoplegic migraine                                   | Migraine                |
| Migraine         | X007O            | Retinal migraine                                           | Migraine                |
| Migraine         | X007Q            | Alternating hemiplegia of childhood                        | Migraine                |
| Migraine         | X007R            | Status migrainosus                                         | Migraine                |
| Migraine         | X007S            | Migraine with ischaemic complication                       | Migraine                |
| Migraine         | Xa07H            | Migraine - menstrual                                       | Migraine                |
| Migraine         | F2610            | Atypical migraine                                          | Migraine                |
| Migraine         | F262.            | Migraine variants                                          | Migraine                |
| Migraine         | F262z            | Migraine variant NOS                                       | Migraine                |
| Migraine         | F26y.            | Other forms of migraine                                    | Migraine                |
| Migraine         | F26yz            | Other forms of migraine NOS                                | Migraine                |
| Migraine         | F26y3            | Complicated migraine                                       | Migraine                |
| Migraine         | F26z.            | Migraine NOS                                               | Migraine                |
| Migraine         | Fyu53            | [X]Other migraine                                          | Migraine                |
| Migraine         | 1474             | H/O: migraine                                              | Migraine                |
| Migraine         | XaXkv            | H/O migraine with aura                                     | Migraine                |
| Migraine         | F260.            | Classical migraine                                         | Migraine                |
| Migraine         | X007J            | Migraine with typical aura                                 | Migraine                |
| Migraine         | X007K            | Migraine with prolonged aura                               | Migraine                |
| Migraine         | F26y0            | Hemiplegic migraine                                        | Migraine                |
| Migraine         | X007L            | Familial hemiplegic migraine                               | Migraine                |
| Migraine         | X007M            | Non-familial hemiplegic migraine                           | Migraine                |
| Migraine         | F2623            | Basilar migraine                                           | Migraine                |
| Migraine         | X007N            | Migraine aura without headache                             | Migraine                |
| Migraine         | F2624            | Ophthalmic migraine                                        | Migraine                |
| Osteoporosis     | 585O.00          | Quantitative ultrasound scan of heel - result osteoporotic | Osteoporosis            |
| Osteoporosis     | 58E4.00          | Forearm DXA scan result osteoporotic                       | Osteoporosis            |
| Osteoporosis     | 58E8.00          | Heel DXA scan T score                                      | Osteoporosis            |
| Osteoporosis     | 58EA.00          | Heel DXA scan result osteoporotic                          | Osteoporosis            |
| Osteoporosis     | 58EA.00          | Heel DXA scan result osteoporotic                          | Osteoporosis            |
| Osteoporosis     | 58EE.00          | Hip DXA scan T score                                       | Osteoporosis            |
| Osteoporosis     | 58EG.00          | Hip DXA scan result osteoporotic                           | Osteoporosis            |
| Osteoporosis     | 58EG.00          | Hip DXA scan result osteoporotic                           | Osteoporosis            |
| Osteoporosis     | 58EK.00          | Lumbar spine DXA scan T score                              | Osteoporosis            |
| Osteoporosis     | 58EM.00          | Lumbar DXA scan result osteoporotic                        | Osteoporosis            |
| Osteoporosis     | 58EM.00          | Lumbar DXA scan result osteoporotic                        | Osteoporosis            |
| Osteoporosis     | 58ES.00          | Femoral neck DEXA scan T score                             | Osteoporosis            |
| Osteoporosis     | 58EV.00          | Femoral neck DEXA scan result osteoporotic                 | Osteoporosis            |
| Osteoporosis     | 7230A            | OSTEOPOROSIS                                               | Osteoporosis            |
| Osteoporosis     | 7230B            | OSTEOPOROSIS SENILIS                                       | Osteoporosis            |
| Osteoporosis     | 7230D            | VERTEBRAL OSTEOPOROSIS                                     | Osteoporosis            |
| Osteoporosis     | 7230PM           | OSTEOPOROSIS POSTMENOPAUSAL                                | Osteoporosis            |
| Osteoporosis     | 7230PT           | OSTEOPOROSIS POST-TRAUMATIC                                | Osteoporosis            |
| Osteoporosis     | N330.00          | Osteoporosis                                               | Osteoporosis            |
| Osteoporosis     | N330.00          | Osteoporosis                                               | Osteoporosis            |

Table S3.1: Primary care READ codes used to identify patients with trial indications

| <b>Condition</b> | <b>Read.code</b> | <b>Description</b>                                         | <b>condition_rename</b> |
|------------------|------------------|------------------------------------------------------------|-------------------------|
| Osteoporosis     | N330000          | Osteoporosis; unspecified                                  | Osteoporosis            |
| Osteoporosis     | N330000          | Osteoporosis; unspecified                                  | Osteoporosis            |
| Osteoporosis     | N330100          | Senile osteoporosis                                        | Osteoporosis            |
| Osteoporosis     | N330100          | Senile osteoporosis                                        | Osteoporosis            |
| Osteoporosis     | N330200          | Postmenopausal osteoporosis                                | Osteoporosis            |
| Osteoporosis     | N330200          | Postmenopausal osteoporosis                                | Osteoporosis            |
| Osteoporosis     | N330300          | Idiopathic osteoporosis                                    | Osteoporosis            |
| Osteoporosis     | N330300          | Idiopathic osteoporosis                                    | Osteoporosis            |
| Osteoporosis     | N330400          | Dissuse osteoporosis                                       | Osteoporosis            |
| Osteoporosis     | N330400          | Dissuse osteoporosis                                       | Osteoporosis            |
| Osteoporosis     | N330500          | Drug-induced osteoporosis                                  | Osteoporosis            |
| Osteoporosis     | N330500          | Drug-induced osteoporosis                                  | Osteoporosis            |
| Osteoporosis     | N330600          | Postoophorectomy osteoporosis                              | Osteoporosis            |
| Osteoporosis     | N330600          | Postoophorectomy osteoporosis                              | Osteoporosis            |
| Osteoporosis     | N330700          | Postsurgical malabsorption osteoporosis                    | Osteoporosis            |
| Osteoporosis     | N330700          | Postsurgical malabsorption osteoporosis                    | Osteoporosis            |
| Osteoporosis     | N330800          | Localized osteoporosis - Lequesne                          | Osteoporosis            |
| Osteoporosis     | N330800          | Localized osteoporosis - Lequesne                          | Osteoporosis            |
| Osteoporosis     | N330900          | Osteoporosis in multiple myelomatosis                      | Osteoporosis            |
| Osteoporosis     | N330900          | Osteoporosis in multiple myelomatosis                      | Osteoporosis            |
| Osteoporosis     | N330A00          | Osteoporosis in endocrine disorders                        | Osteoporosis            |
| Osteoporosis     | N330A00          | Osteoporosis in endocrine disorders                        | Osteoporosis            |
| Osteoporosis     | N330B00          | Vertebral osteoporosis                                     | Osteoporosis            |
| Osteoporosis     | N330B00          | Vertebral osteoporosis                                     | Osteoporosis            |
| Osteoporosis     | N330C00          | Osteoporosis localized to spine                            | Osteoporosis            |
| Osteoporosis     | N330C00          | Osteoporosis localized to spine                            | Osteoporosis            |
| Osteoporosis     | N330D00          | Osteoporosis due to corticosteroids                        | Osteoporosis            |
| Osteoporosis     | N330D00          | Osteoporosis due to corticosteroids                        | Osteoporosis            |
| Osteoporosis     | N330z00          | Osteoporosis NOS                                           | Osteoporosis            |
| Osteoporosis     | N330z00          | Osteoporosis NOS                                           | Osteoporosis            |
| Osteoporosis     | N331200          | Postoophorectomy osteoporosis with pathological fracture   | Osteoporosis            |
| Osteoporosis     | N331200          | Postoophorectomy osteoporosis with pathological fracture   | Osteoporosis            |
| Osteoporosis     | N331300          | Osteoporosis of disuse with pathological fracture          | Osteoporosis            |
| Osteoporosis     | N331300          | Osteoporosis of disuse with pathological fracture          | Osteoporosis            |
| Osteoporosis     | N331400          | Postsurgical malabsorption osteoporosis with path fracture | Osteoporosis            |
| Osteoporosis     | N331500          | Drug-induced osteoporosis with pathological fracture       | Osteoporosis            |
| Osteoporosis     | N331600          | Idiopathic osteoporosis with pathological fracture         | Osteoporosis            |
| Osteoporosis     | N331600          | Idiopathic osteoporosis with pathological fracture         | Osteoporosis            |
| Osteoporosis     | N331800          | Osteoporosis + pathological fracture lumbar vertebrae      | Osteoporosis            |
| Osteoporosis     | N331900          | Osteoporosis + pathological fracture thoracic vertebrae    | Osteoporosis            |
| Osteoporosis     | N331A00          | Osteoporosis + pathological fracture                       | Osteoporosis            |

Table S3.1: Primary care READ codes used to identify patients with trial indications

| Condition                                 | Read.code | Description                                             | condition_rename                          |
|-------------------------------------------|-----------|---------------------------------------------------------|-------------------------------------------|
|                                           |           | cervical vertebrae                                      |                                           |
| Osteoporosis                              | N331B00   | Postmenopausal osteoporosis with pathological fracture  | Osteoporosis                              |
| Osteoporosis                              | N331M00   | Fragility fracture due to unspecified osteoporosis      | Osteoporosis                              |
| Osteoporosis                              | N331N00   | Fragility fracture                                      | Osteoporosis                              |
| Osteoporosis                              | NyuB000   | [X]Other osteoporosis with pathological fracture        | Osteoporosis                              |
| Osteoporosis                              | NyuB000   | [X]Other osteoporosis with pathological fracture        | Osteoporosis                              |
| Osteoporosis                              | NyuB100   | [X]Other osteoporosis                                   | Osteoporosis                              |
| Osteoporosis                              | NyuB100   | [X]Other osteoporosis                                   | Osteoporosis                              |
| Osteoporosis                              | NyuB200   | [X]Osteoporosis in other disorders classified elsewhere | Osteoporosis                              |
| Osteoporosis                              | NyuB800   | [X]Unspecified osteoporosis with pathological fracture  | Osteoporosis                              |
| Osteoporosis                              | NyuB800   | [X]Unspecified osteoporosis with pathological fracture  | Osteoporosis                              |
| Parkinson's disease (excluding secondary) | 147F.     | History of Parkinson's disease                          | Parkinson's disease (excluding secondary) |
| Parkinson's disease (excluding secondary) | 297A.     | O/E - Parkinsonian tremor                               | Parkinson's disease (excluding secondary) |
| Parkinson's disease (excluding secondary) | 2987.     | O/E -Parkinson flexion posture                          | Parkinson's disease (excluding secondary) |
| Parkinson's disease (excluding secondary) | 2994.     | O/E-festination-Parkinson gait                          | Parkinson's disease (excluding secondary) |
| Parkinson's disease (excluding secondary) | Eu023     | [X]Dementia in Parkinson's disease                      | Parkinson's disease (excluding secondary) |
| Parkinson's disease (excluding secondary) | F11x9     | Cerebral degeneration in Parkinson's disease            | Parkinson's disease (excluding secondary) |
| Parkinson's disease (excluding secondary) | F12..     | Parkinson's disease                                     | Parkinson's disease (excluding secondary) |
| Parkinson's disease (excluding secondary) | F120.     | Paralysis agitans                                       | Parkinson's disease (excluding secondary) |
| Parkinson's disease (excluding secondary) | F12z.     | Parkinson's disease NOS                                 | Parkinson's disease (excluding secondary) |
| Parkinson's disease (excluding secondary) | F1303     | Parkinsonism with orthostatic hypotension               | Parkinson's disease (excluding secondary) |
| Parkinson's disease (excluding secondary) | Fyu22     | [X]Parkinsonism in diseases classified elsewhere        | Parkinson's disease (excluding secondary) |
| Psoriasis                                 | 14F2.     | H/O: psoriasis                                          | Psoriasis                                 |
| Psoriasis                                 | M160.     | Psoriatic arthropathy                                   | Psoriasis                                 |
| Psoriasis                                 | M1600     | Psoriasis spondylitica                                  | Psoriasis                                 |
| Psoriasis                                 | M1601     | Distal interphalangeal psoriatic arthropathy            | Psoriasis                                 |
| Psoriasis                                 | M160z     | Psoriatic arthropathy NOS                               | Psoriasis                                 |
| Psoriasis                                 | M161.     | Other psoriasis                                         | Psoriasis                                 |
| Psoriasis                                 | M1610     | Psoriasis unspecified                                   | Psoriasis                                 |
| Psoriasis                                 | M1611     | Psoriasis annularis                                     | Psoriasis                                 |
| Psoriasis                                 | M1612     | Psoriasis circinata                                     | Psoriasis                                 |
| Psoriasis                                 | M1613     | Psoriasis diffusa                                       | Psoriasis                                 |
| Psoriasis                                 | M1614     | Psoriasis discoidea                                     | Psoriasis                                 |
| Psoriasis                                 | M1615     | Psoriasis geographica                                   | Psoriasis                                 |

Table S3.1: Primary care READ codes used to identify patients with trial indications

| <b>Condition</b>      | <b>Read.code</b> | <b>Description</b>                                           | <b>condition_rename</b>                |
|-----------------------|------------------|--------------------------------------------------------------|----------------------------------------|
| Psoriasis             | M1616            | Guttate psoriasis                                            | Psoriasis                              |
| Psoriasis             | M1617            | Psoriasis gyrata                                             | Psoriasis                              |
| Psoriasis             | M1618            | Psoriasis inveterata                                         | Psoriasis                              |
| Psoriasis             | M1619            | Psoriasis ostracea                                           | Psoriasis                              |
| Psoriasis             | M161A            | Psoriasis palmaris                                           | Psoriasis                              |
| Psoriasis             | M161B            | Psoriasis plantaris                                          | Psoriasis                              |
| Psoriasis             | M161C            | Psoriasis punctata                                           | Psoriasis                              |
| Psoriasis             | M161D            | Pustular psoriasis                                           | Psoriasis                              |
| Psoriasis             | M161E            | Psoriasis universalis                                        | Psoriasis                              |
| Psoriasis             | M161F            | Psoriasis vulgaris                                           | Psoriasis                              |
| Psoriasis             | M161G            | Acrodermatitis continua                                      | Psoriasis                              |
| Psoriasis             | M161H            | Erythrodermic psoriasis                                      | Psoriasis                              |
| Psoriasis             | M161z            | Psoriasis NOS                                                | Psoriasis                              |
| Psoriasis             | M16y.            | Other psoriasis and similar disorders                        | Psoriasis                              |
| Psoriasis             | M16y0            | Scalp psoriasis                                              | Psoriasis                              |
| Psoriasis             | M16z.            | Psoriasis and similar disorders NOS                          | Psoriasis                              |
| Psoriasis             | Myu30            | [X]Other psoriasis                                           | Psoriasis                              |
| Psoriasis             | N0452            | Juvenile arthritis in psoriasis                              | Psoriasis                              |
| Psoriasis             | Nyu13            | [X]Other psoriatic arthropathies                             | Psoriasis                              |
| Psoriatic arthropathy | N0452            | Juvenile arthritis in psoriasis                              | Psoriatic arthropathy                  |
| Psoriatic arthropathy | M1600            | Psoriasis spondylitica                                       | Psoriatic arthropathy                  |
| Psoriatic arthropathy | M1601            | Distal interphalangeal psoriatic arthropathy                 | Psoriatic arthropathy                  |
| Psoriatic arthropathy | M1602            | Arthritis mutilans                                           | Psoriatic arthropathy                  |
| Psoriatic arthropathy | Nyu13            | [X]Other psoriatic arthropathies                             | Psoriatic arthropathy                  |
| Psoriatic arthropathy | M160.            | Psoriatic arthropathy                                        | Psoriatic arthropathy                  |
| Psoriatic arthropathy | M160z            | Psoriatic arthropathy NOS                                    | Psoriatic arthropathy                  |
| COPD                  | 66YB.            | Chronic obstructive pulmonary disease monitoring             | Pulmonary Disease, Chronic Obstructive |
| COPD                  | 66Yd.            | COPD accident and emergency attendance since last visit      | Pulmonary Disease, Chronic Obstructive |
| COPD                  | 66YD.            | Chronic obstructive pulmonary disease monitoring due         | Pulmonary Disease, Chronic Obstructive |
| COPD                  | 66Ye.            | Emergency COPD admission since last appointment              | Pulmonary Disease, Chronic Obstructive |
| COPD                  | 66Yf.            | Number of COPD exacerbations in past year                    | Pulmonary Disease, Chronic Obstructive |
| COPD                  | 66Yg.            | Chronic obstructive pulmonary disease disturbs sleep         | Pulmonary Disease, Chronic Obstructive |
| COPD                  | 66Yh.            | Chronic obstructive pulmonary disease does not disturb sleep | Pulmonary Disease, Chronic Obstructive |
| COPD                  | 66Yi.            | Multiple COPD emergency hospital admissions                  | Pulmonary Disease, Chronic Obstructive |
| COPD                  | 66YI.            | COPD self-management plan given                              | Pulmonary Disease, Chronic Obstructive |
| COPD                  | 66YL.            | Chronic obstructive pulmonary disease follow-up              | Pulmonary Disease, Chronic Obstructive |
| COPD                  | 66YM.            | Chronic obstructive pulmonary disease annual review          | Pulmonary Disease, Chronic Obstructive |
| COPD                  | 66YS.            | Chronic obstructive pulmonary disease monitoring by nurse    | Pulmonary Disease, Chronic Obstructive |
| COPD                  | 66YT.            | Chronic obstructive pulmonary disease monitoring by doctor   | Pulmonary Disease, Chronic Obstructive |

Table S3.1: Primary care READ codes used to identify patients with trial indications

| <b>Condition</b> | <b>Read.code</b> | <b>Description</b>                                              | <b>condition_rename</b>                   |
|------------------|------------------|-----------------------------------------------------------------|-------------------------------------------|
| COPD             | 8CR1.            | Chronic obstructive pulmonary disease<br>clini management plan  | Pulmonary Disease,<br>Chronic Obstructive |
| COPD             | H3...            | Chronic obstructive pulmonary disease                           | Pulmonary Disease,<br>Chronic Obstructive |
| COPD             | H3121            | Emphysematous bronchitis                                        | Pulmonary Disease,<br>Chronic Obstructive |
| COPD             | H3122            | Acute exacerbation of chronic<br>obstructive airways disease    | Pulmonary Disease,<br>Chronic Obstructive |
| COPD             | H312z            | Obstructive chronic bronchitis NOS                              | Pulmonary Disease,<br>Chronic Obstructive |
| COPD             | H32..            | Emphysema                                                       | Pulmonary Disease,<br>Chronic Obstructive |
| COPD             | H320.            | Chronic bullous emphysema                                       | Pulmonary Disease,<br>Chronic Obstructive |
| COPD             | H3200            | Segmental bullous emphysema                                     | Pulmonary Disease,<br>Chronic Obstructive |
| COPD             | H3201            | Zonal bullous emphysema                                         | Pulmonary Disease,<br>Chronic Obstructive |
| COPD             | H3202            | Giant bullous emphysema                                         | Pulmonary Disease,<br>Chronic Obstructive |
| COPD             | H3203            | Bullous emphysema with collapse                                 | Pulmonary Disease,<br>Chronic Obstructive |
| COPD             | H320z            | Chronic bullous emphysema NOS                                   | Pulmonary Disease,<br>Chronic Obstructive |
| COPD             | H321.            | Panlobular emphysema                                            | Pulmonary Disease,<br>Chronic Obstructive |
| COPD             | H322.            | Centrilobular emphysema                                         | Pulmonary Disease,<br>Chronic Obstructive |
| COPD             | H32y.            | Other emphysema                                                 | Pulmonary Disease,<br>Chronic Obstructive |
| COPD             | H32y0            | Acute vesicular emphysema                                       | Pulmonary Disease,<br>Chronic Obstructive |
| COPD             | H32y1            | Atrophic (senile) emphysema                                     | Pulmonary Disease,<br>Chronic Obstructive |
| COPD             | H32y2            | MacLeod's unilateral emphysema                                  | Pulmonary Disease,<br>Chronic Obstructive |
| COPD             | H32yz            | Other emphysema NOS                                             | Pulmonary Disease,<br>Chronic Obstructive |
| COPD             | H32z.            | Emphysema NOS                                                   | Pulmonary Disease,<br>Chronic Obstructive |
| COPD             | H36..            | Mild chronic obstructive pulmonary<br>disease                   | Pulmonary Disease,<br>Chronic Obstructive |
| COPD             | H37..            | Moderate chronic obstructive<br>pulmonary disease               | Pulmonary Disease,<br>Chronic Obstructive |
| COPD             | H38..            | Severe chronic obstructive pulmonary<br>disease                 | Pulmonary Disease,<br>Chronic Obstructive |
| COPD             | H39..            | Very severe chronic obstructive<br>pulmonary disease            | Pulmonary Disease,<br>Chronic Obstructive |
| COPD             | H3y..            | Other specified chronic obstructive<br>airways disease          | Pulmonary Disease,<br>Chronic Obstructive |
| COPD             | H3y0.            | Chronic obstruct pulmonary dis with<br>acute lower resp infectn | Pulmonary Disease,<br>Chronic Obstructive |
| COPD             | H3y1.            | Chron obstruct pulmonary dis wth                                | Pulmonary Disease,                        |

Table S3.1: Primary care READ codes used to identify patients with trial indications

| Condition            | Read.code | Description                                                 | condition_rename                       |
|----------------------|-----------|-------------------------------------------------------------|----------------------------------------|
|                      |           | acute exacerbation, unspec                                  | Chronic Obstructive                    |
| COPD                 | H3z..     | Chronic obstructive airways disease NOS                     | Pulmonary Disease, Chronic Obstructive |
| COPD                 | H464D     | Chronic emphysema due to chemical fumes                     | Pulmonary Disease, Chronic Obstructive |
| COPD                 | Hyu3.     | [X]Chronic lower respiratory diseases                       | Pulmonary Disease, Chronic Obstructive |
| COPD                 | Hyu30     | [X]Other emphysema                                          | Pulmonary Disease, Chronic Obstructive |
| COPD                 | Hyu31     | [X]Other specified chronic obstructive pulmonary disease    | Pulmonary Disease, Chronic Obstructive |
| Restless leg         | F13z2     | Ekbom syndrome                                              | Restless legs syndrome                 |
| Rheumatoir arthritis | 14G1.     | H/O: rheumatoid arthritis                                   | Rheumatoid arthritis                   |
| Rheumatoir arthritis | F3712     | Polyneuropathy in rheumatoid arthritis                      | Rheumatoid arthritis                   |
| Rheumatoir arthritis | F3964     | Myopathy due to rheumatoid arthritis                        | Rheumatoid arthritis                   |
| Rheumatoir arthritis | G5yA.     | Rheumatoid carditis                                         | Rheumatoid arthritis                   |
| Rheumatoir arthritis | G5y8.     | Rheumatoid myocarditis                                      | Rheumatoid arthritis                   |
| Rheumatoir arthritis | H570.     | Rheumatoid lung                                             | Rheumatoid arthritis                   |
| Rheumatoir arthritis | N04..     | Rheumatoid arthritis and other inflammatory polyarthropathy | Rheumatoid arthritis                   |
| Rheumatoir arthritis | N040.     | Rheumatoid arthritis                                        | Rheumatoid arthritis                   |
| Rheumatoir arthritis | N0400     | Rheumatoid arthritis of cervical spine                      | Rheumatoid arthritis                   |
| Rheumatoir arthritis | N0401     | Other rheumatoid arthritis of spine                         | Rheumatoid arthritis                   |
| Rheumatoir arthritis | N0402     | Rheumatoid arthritis of shoulder                            | Rheumatoid arthritis                   |
| Rheumatoir arthritis | N0403     | Rheumatoid arthritis of sternoclavicular joint              | Rheumatoid arthritis                   |
| Rheumatoir arthritis | N0404     | Rheumatoid arthritis of acromioclavicular joint             | Rheumatoid arthritis                   |
| Rheumatoir arthritis | N0405     | Rheumatoid arthritis of elbow                               | Rheumatoid arthritis                   |
| Rheumatoir arthritis | N0406     | Rheumatoid arthritis of distal radio-ulnar joint            | Rheumatoid arthritis                   |
| Rheumatoir arthritis | N0407     | Rheumatoid arthritis of wrist                               | Rheumatoid arthritis                   |
| Rheumatoir arthritis | N0408     | Rheumatoid arthritis of MCP joint                           | Rheumatoid arthritis                   |
| Rheumatoir arthritis | N0409     | Rheumatoid arthritis of PIP joint of finger                 | Rheumatoid arthritis                   |
| Rheumatoir arthritis | N040A     | Rheumatoid arthritis of DIP joint of finger                 | Rheumatoid arthritis                   |
| Rheumatoir arthritis | N040B     | Rheumatoid arthritis of hip                                 | Rheumatoid arthritis                   |
| Rheumatoir arthritis | N040C     | Rheumatoid arthritis of sacro-iliac joint                   | Rheumatoid arthritis                   |
| Rheumatoir arthritis | N040D     | Rheumatoid arthritis of knee                                | Rheumatoid arthritis                   |
| Rheumatoir arthritis | N040E     | Rheumatoid arthritis of tibio-fibular joint                 | Rheumatoid arthritis                   |
| Rheumatoir arthritis | N040F     | Rheumatoid arthritis of ankle                               | Rheumatoid arthritis                   |
| Rheumatoir arthritis | N040G     | Rheumatoid arthritis of subtalar joint                      | Rheumatoid arthritis                   |
| Rheumatoir arthritis | N040H     | Rheumatoid arthritis of talonavicular joint                 | Rheumatoid arthritis                   |
| Rheumatoir arthritis | N040J     | Rheumatoid arthritis of other tarsal joint                  | Rheumatoid arthritis                   |
| Rheumatoir arthritis | N040K     | Rheumatoid arthritis of 1st MTP joint                       | Rheumatoid arthritis                   |
| Rheumatoir arthritis | N040L     | Rheumatoid arthritis of lesser MTP joint                    | Rheumatoid arthritis                   |
| Rheumatoir arthritis | N040M     | Rheumatoid arthritis of IP joint of toe                     | Rheumatoid arthritis                   |
| Rheumatoir arthritis | N040N     | Rheumatoid vasculitis                                       | Rheumatoid arthritis                   |

Table S3.1: Primary care READ codes used to identify patients with trial indications

| <b>Condition</b>     | <b>Read.code</b> | <b>Description</b>                                           | <b>condition_rename</b>      |
|----------------------|------------------|--------------------------------------------------------------|------------------------------|
| Rheumatoir arthritis | N040P            | Seronegative rheumatoid arthritis                            | Rheumatoid arthritis         |
| Rheumatoir arthritis | N040Q            | Rheumatoid bursitis                                          | Rheumatoid arthritis         |
| Rheumatoir arthritis | N040R            | Rheumatoid nodule                                            | Rheumatoid arthritis         |
| Rheumatoir arthritis | N040S            | Rheumatoid arthritis - multiple joint                        | Rheumatoid arthritis         |
| Rheumatoir arthritis | N040T            | Flare of rheumatoid arthritis                                | Rheumatoid arthritis         |
| Rheumatoir arthritis | N041.            | Felty's syndrome                                             | Rheumatoid arthritis         |
| Rheumatoir arthritis | N042.            | Other rheumatoid arthropathy + visceral/systemic involvement | Rheumatoid arthritis         |
| Rheumatoir arthritis | N0421            | Rheumatoid lung disease                                      | Rheumatoid arthritis         |
| Rheumatoir arthritis | N0422            | Rheumatoid nodule                                            | Rheumatoid arthritis         |
| Rheumatoir arthritis | N042z            | Rheumatoid arthropathy + visceral/systemic involvement NOS   | Rheumatoid arthritis         |
| Rheumatoir arthritis | N043.            | Juvenile rheumatoid arthritis - Still's disease              | Rheumatoid arthritis         |
| Rheumatoir arthritis | N0430            | Juvenile rheumatoid arthropathy unspecified                  | Rheumatoid arthritis         |
| Rheumatoir arthritis | N0431            | Acute polyarticular juvenile rheumatoid arthritis            | Rheumatoid arthritis         |
| Rheumatoir arthritis | N0432            | Pauciarticular juvenile rheumatoid arthritis                 | Rheumatoid arthritis         |
| Rheumatoir arthritis | N0433            | Monarticular juvenile rheumatoid arthritis                   | Rheumatoid arthritis         |
| Rheumatoir arthritis | N043z            | Juvenile rheumatoid arthritis NOS                            | Rheumatoid arthritis         |
| Rheumatoir arthritis | N047.            | Seropositive erosive rheumatoid arthritis                    | Rheumatoid arthritis         |
| Rheumatoir arthritis | N04X.            | Seropositive rheumatoid arthritis, unspecified               | Rheumatoid arthritis         |
| Rheumatoir arthritis | N04y2            | Adult-onset Still's disease                                  | Rheumatoid arthritis         |
| Rheumatoir arthritis | N0455            | Juvenile rheumatoid arthritis                                | Rheumatoid arthritis         |
| SLE                  | Nyu43            | [X]Other forms of systemic lupus erythematosus               | Systemic Lupus Erythematosus |
| SLE                  | H57y4            | Lung disease with systemic lupus erythematosus               | Systemic Lupus Erythematosus |
| SLE                  | K01x4            | Nephrotic syndrome in systemic lupus erythematosus           | Systemic Lupus Erythematosus |
| SLE                  | K0B40            | Renal tubulo-interstitial disorder in SLE                    | Systemic Lupus Erythematosus |
| SLE                  | N000.            | Systemic lupus erythematosus                                 | Systemic Lupus Erythematosus |
| SLE                  | N0000            | Disseminated lupus erythematosus                             | Systemic Lupus Erythematosus |
| SLE                  | N0002            | Drug-induced systemic lupus erythematosus                    | Systemic Lupus Erythematosus |
| SLE                  | N0003            | Systemic lupus erythematosus with organ or sys involv        | Systemic Lupus Erythematosus |
| SLE                  | N0004            | Systemic lupus erythematosus with pericarditis               | Systemic Lupus Erythematosus |
| SLE                  | N000z            | Systemic lupus erythematosus NOS                             | Systemic Lupus Erythematosus |
| SLE                  | F371.            | Polyneuropathy in collagen vascular disease                  | Systemic Lupus Erythematosus |
| SLE                  | F3961            | Myopathy due to disseminated lupus erythematosus             | Systemic Lupus Erythematosus |



Table S3.1: Primary care READ codes used to identify patients with trial indications

| <b>Condition</b> | <b>Read.code</b> | <b>Description</b>                                     | <b>condition_rename</b> |
|------------------|------------------|--------------------------------------------------------|-------------------------|
| Thromboembolism  | 14A8.00          | H/O: thrombo-embolism                                  | Thromboembolism         |
| Thromboembolism  | 14A8100          | H/O: Deep Vein Thrombosis                              | Thromboembolism         |
| Thromboembolism  | 14A8.11          | H/O: embolism                                          | Thromboembolism         |
| Thromboembolism  | 14A8.12          | H/O: thrombosis                                        | Thromboembolism         |
| Thromboembolism  | 14AC.00          | H/O: pulmonary embolus                                 | Thromboembolism         |
| Thromboembolism  | G401.00          | Pulmonary embolism                                     | Thromboembolism         |
| Thromboembolism  | G401000          | Post operative pulmonary embolus                       | Thromboembolism         |
| Thromboembolism  | G401100          | Recurrent pulmonary embolism                           | Thromboembolism         |
| Thromboembolism  | G401.11          | Infarction - pulmonary                                 | Thromboembolism         |
| Thromboembolism  | G401.12          | Pulmonary embolus                                      | Thromboembolism         |
| Thromboembolism  | G41y100          | Thromboembolic pulmonary hypertension                  | Thromboembolism         |
| Thromboembolism  | G74..00          | Arterial embolism and thrombosis                       | Thromboembolism         |
| Thromboembolism  | G740.00          | Embolism and thrombosis of the abdominal aorta         | Thromboembolism         |
| Thromboembolism  | G740.11          | Aortic bifurcation syndrome                            | Thromboembolism         |
| Thromboembolism  | G740.12          | Aortoiliac obstruction                                 | Thromboembolism         |
| Thromboembolism  | G740.13          | Leriche's syndrome                                     | Thromboembolism         |
| Thromboembolism  | G740.14          | Saddle embolus                                         | Thromboembolism         |
| Thromboembolism  | G741.00          | Embolism and thrombosis of the thoracic aorta          | Thromboembolism         |
| Thromboembolism  | G74..11          | Arterial embolus and thrombosis                        | Thromboembolism         |
| Thromboembolism  | G74..12          | Thrombosis - arterial                                  | Thromboembolism         |
| Thromboembolism  | G74..13          | Arterial embolic and thrombotic occlusion              | Thromboembolism         |
| Thromboembolism  | G742.00          | Embolism and thrombosis of an arm or leg artery        | Thromboembolism         |
| Thromboembolism  | G742000          | Embolism and thrombosis of the brachial artery         | Thromboembolism         |
| Thromboembolism  | G742100          | Embolism and thrombosis of the radial artery           | Thromboembolism         |
| Thromboembolism  | G742200          | Embolism and thrombosis of the ulnar artery            | Thromboembolism         |
| Thromboembolism  | G742300          | Embolism and thrombosis of an arm artery NOS           | Thromboembolism         |
| Thromboembolism  | G742400          | Embolism and thrombosis of the femoral artery          | Thromboembolism         |
| Thromboembolism  | G742500          | Embolism and thrombosis of the popliteal artery        | Thromboembolism         |
| Thromboembolism  | G742600          | Embolism and thrombosis of the anterior tibial artery  | Thromboembolism         |
| Thromboembolism  | G742700          | Embolism and thrombosis of the dorsalis pedis artery   | Thromboembolism         |
| Thromboembolism  | G742800          | Embolism and thrombosis of the posterior tibial artery | Thromboembolism         |
| Thromboembolism  | G742900          | Embolism and thrombosis of a leg artery NOS            | Thromboembolism         |
| Thromboembolism  | G742A00          | Post radiological embolism of upper limb artery        | Thromboembolism         |
| Thromboembolism  | G742B00          | Post radiological embolism of lower limb artery        | Thromboembolism         |
| Thromboembolism  | G742z00          | Peripheral arterial embolism and thrombosis NOS        | Thromboembolism         |

Table S3.1: Primary care READ codes used to identify patients with trial indications

| <b>Condition</b> | <b>Read.code</b> | <b>Description</b>                                          | <b>condition_rename</b> |
|------------------|------------------|-------------------------------------------------------------|-------------------------|
| Thromboembolism  | G743.00          | Embolism and thrombosis of other and unspec parts aorta     | Thromboembolism         |
| Thromboembolism  | G74y.00          | Embolism and thrombosis of other specified artery           | Thromboembolism         |
| Thromboembolism  | G74y000          | Embolism and/or thrombosis of the common iliac artery       | Thromboembolism         |
| Thromboembolism  | G74y100          | Embolism and/or thrombosis of the internal iliac artery     | Thromboembolism         |
| Thromboembolism  | G74y200          | Embolism and/or thrombosis of the external iliac artery     | Thromboembolism         |
| Thromboembolism  | G74y300          | Embolism and thrombosis of the iliac artery unspecified     | Thromboembolism         |
| Thromboembolism  | G74y500          | Embolism and thrombosis of the subclavian artery            | Thromboembolism         |
| Thromboembolism  | G74y600          | Embolism and thrombosis of the splenic artery               | Thromboembolism         |
| Thromboembolism  | G74y700          | Embolism and thrombosis of the axillary artery              | Thromboembolism         |
| Thromboembolism  | G74y800          | Embolism and thrombosis of the coeliac artery               | Thromboembolism         |
| Thromboembolism  | G74y900          | Embolism and thrombosis of the hepatic artery               | Thromboembolism         |
| Thromboembolism  | G74yz00          | Embolism and thrombosis of other arteries NOS               | Thromboembolism         |
| Thromboembolism  | G74z.00          | Arterial embolism and thrombosis NOS                        | Thromboembolism         |
| Thromboembolism  | G801.00          | Deep vein phlebitis and thrombophlebitis of the leg         | Thromboembolism         |
| Thromboembolism  | G801000          | Phlebitis of the femoral vein                               | Thromboembolism         |
| Thromboembolism  | G801100          | Phlebitis of the popliteal vein                             | Thromboembolism         |
| Thromboembolism  | G801.11          | Deep vein thrombosis                                        | Thromboembolism         |
| Thromboembolism  | G801.12          | Deep vein thrombosis; leg                                   | Thromboembolism         |
| Thromboembolism  | G801.13          | DVT - Deep vein thrombosis                                  | Thromboembolism         |
| Thromboembolism  | G801200          | Phlebitis of the anterior tibial vein                       | Thromboembolism         |
| Thromboembolism  | G801400          | Phlebitis of the posterior tibial vein                      | Thromboembolism         |
| Thromboembolism  | G801500          | Deep vein phlebitis of the leg unspecified                  | Thromboembolism         |
| Thromboembolism  | G801600          | Thrombophlebitis of the femoral vein                        | Thromboembolism         |
| Thromboembolism  | G801700          | Thrombophlebitis of the popliteal vein                      | Thromboembolism         |
| Thromboembolism  | G801800          | Thrombophlebitis of the anterior tibial vein                | Thromboembolism         |
| Thromboembolism  | G801900          | Thrombophlebitis of the dorsalis pedis vein                 | Thromboembolism         |
| Thromboembolism  | G801A00          | Thrombophlebitis of the posterior tibial vein               | Thromboembolism         |
| Thromboembolism  | G801B00          | Deep vein thrombophlebitis of the leg unspecified           | Thromboembolism         |
| Thromboembolism  | G801C00          | Deep vein thrombosis of leg related to air travel           | Thromboembolism         |
| Thromboembolism  | G801D00          | Deep vein thrombosis of lower limb                          | Thromboembolism         |
| Thromboembolism  | G801E00          | Deep vein thrombosis of leg related to intravenous drug use | Thromboembolism         |
| Thromboembolism  | G801F00          | Deep vein thrombosis of peroneal vein                       | Thromboembolism         |
| Thromboembolism  | G801G00          | Recurrent deep vein thrombosis                              | Thromboembolism         |

Table S3.1: Primary care READ codes used to identify patients with trial indications

| <b>Condition</b> | <b>Read.code</b> | <b>Description</b>                                      | <b>condition_rename</b> |
|------------------|------------------|---------------------------------------------------------|-------------------------|
| Thromboembolism  | G801z00          | Deep vein phlebitis and thrombophlebitis of the leg NOS | Thromboembolism         |
| Thromboembolism  | G802000          | Thrombosis of vein of leg                               | Thromboembolism         |
| Thromboembolism  | G81..00          | Portal vein thrombosis                                  | Thromboembolism         |
| Thromboembolism  | G82..00          | Other venous embolism and thrombosis                    | Thromboembolism         |
| Thromboembolism  | G820.00          | Budd - Chiari syndrome (hepatic vein thrombosis)        | Thromboembolism         |
| Thromboembolism  | G820.11          | Hepatic vein thrombosis                                 | Thromboembolism         |
| Thromboembolism  | G821.00          | Thrombophlebitis migrans                                | Thromboembolism         |
| Thromboembolism  | G822.00          | Embolism and thrombosis of the vena cava                | Thromboembolism         |
| Thromboembolism  | G822000          | Thrombosis of inferior vena cava                        | Thromboembolism         |
| Thromboembolism  | G823.00          | Embolism and thrombosis of the renal vein               | Thromboembolism         |
| Thromboembolism  | G824.00          | Axillary vein thrombosis                                | Thromboembolism         |
| Thromboembolism  | G825.00          | Thrombosis of subclavian vein                           | Thromboembolism         |
| Thromboembolism  | G826.00          | Thrombosis of internal jugular vein                     | Thromboembolism         |
| Thromboembolism  | G827.00          | Thrombosis of external jugular vein                     | Thromboembolism         |
| Thromboembolism  | G82y.00          | Other embolism and thrombosis                           | Thromboembolism         |
| Thromboembolism  | G82z.00          | Embolism and thrombosis NOS                             | Thromboembolism         |
| Thromboembolism  | G82z000          | Embolus of vein NOS                                     | Thromboembolism         |
| Thromboembolism  | G82z011          | Embolism of vein NOS                                    | Thromboembolism         |
| Thromboembolism  | G82z100          | Thrombosis of vein NOS                                  | Thromboembolism         |
| Thromboembolism  | G82zz00          | Embolism and thrombosis NOS                             | Thromboembolism         |
| Thromboembolism  | G8y4.00          | Postthrombotic syndrome                                 | Thromboembolism         |
| Thromboembolism  | Gyu8200          | [X]Embolism and thrombosis of other specified veins     | Thromboembolism         |
| Thromboembolism  | SP12200          | Post operative deep vein thrombosis                     | Thromboembolism         |
| Thromboembolism  | SP32100          | Thromboembolism after infusion                          | Thromboembolism         |
| Thromboembolism  | ZV12800          | [V] Personal history deep vein thrombosis               | Thromboembolism         |
| Thromboembolism  | ZV12811          | [V] Personal history DVT- deep vein thrombosis          | Thromboembolism         |
| Thromboembolism  | ZV12900          | [V] Personal history of pulmonary embolism              | Thromboembolism         |
| Osteoarthritis   | X7039            | Spondylosis                                             | Osteoarthritis          |
| Osteoarthritis   | X703j            | Cervical spondylosis                                    | Osteoarthritis          |
| Osteoarthritis   | N119.            | Cervical spondylosis with radiculopathy                 | Osteoarthritis          |
| Osteoarthritis   | N1190            | Single-level cervical spondylosis with radiculopathy    | Osteoarthritis          |
| Osteoarthritis   | N1191            | Two-level cervical spondylosis with radiculopathy       | Osteoarthritis          |
| Osteoarthritis   | N1192            | Multiple-level cervical spondylosis with radiculopathy  | Osteoarthritis          |
| Osteoarthritis   | XE1Ev            | Cervical spondylosis with myelopathy                    | Osteoarthritis          |
| Osteoarthritis   | N1110            | Single-level cervical spondylosis with myelopathy       | Osteoarthritis          |
| Osteoarthritis   | N1111            | Two-level cervical spondylosis with myelopathy          | Osteoarthritis          |
| Osteoarthritis   | N1112            | Multiple-level cervical spondylosis with myelopathy     | Osteoarthritis          |

Table S3.1: Primary care READ codes used to identify patients with trial indications

| <b>Condition</b> | <b>Read.code</b> | <b>Description</b>                                                               | <b>condition_rename</b> |
|------------------|------------------|----------------------------------------------------------------------------------|-------------------------|
| Osteoarthritis   | N11A.            | Cervical spondylosis with vascular compression                                   | Osteoarthritis          |
| Osteoarthritis   | XE1Eu            | Cervical spondylosis without myelopathy                                          | Osteoarthritis          |
| Osteoarthritis   | N1100            | Single-level cervical spondylosis without myelopathy                             | Osteoarthritis          |
| Osteoarthritis   | N1101            | Two-level cervical spondylosis without myelopathy                                | Osteoarthritis          |
| Osteoarthritis   | N1102            | Multiple-level cervical spondylosis without myelopathy                           | Osteoarthritis          |
| Osteoarthritis   | N110.            | Cervical spondylosis (& [without myelopathy]) or (osteoarthritis cervical spine) | Osteoarthritis          |
| Osteoarthritis   | X70Cw            | Thoracic spondylosis                                                             | Osteoarthritis          |
| Osteoarthritis   | N11B.            | Thoracic spondylosis with radiculopathy                                          | Osteoarthritis          |
| Osteoarthritis   | N11B0            | Single-level thoracic spondylosis with radiculopathy                             | Osteoarthritis          |
| Osteoarthritis   | N11B1            | Two-level thoracic spondylosis with radiculopathy                                | Osteoarthritis          |
| Osteoarthritis   | N11B2            | Multiple-level thoracic spondylosis with radiculopathy                           | Osteoarthritis          |
| Osteoarthritis   | N113.            | Thoracic spondylosis with myelopathy                                             | Osteoarthritis          |
| Osteoarthritis   | N1130            | Single-level thoracic spondylosis with myelopathy                                | Osteoarthritis          |
| Osteoarthritis   | N1131            | Two-level thoracic spondylosis with myelopathy                                   | Osteoarthritis          |
| Osteoarthritis   | N1132            | Multiple-level thoracic spondylosis with myelopathy                              | Osteoarthritis          |
| Osteoarthritis   | XE1Ew            | Thoracic spondylosis without myelopathy                                          | Osteoarthritis          |
| Osteoarthritis   | N1120            | Single-level thoracic spondylosis without myelopathy                             | Osteoarthritis          |
| Osteoarthritis   | N1121            | Two-level thoracic spondylosis without myelopathy                                | Osteoarthritis          |
| Osteoarthritis   | N1122            | Multiple-level thoracic spondylosis without myelopathy                           | Osteoarthritis          |
| Osteoarthritis   | N112.            | Thoracic spondylosis (& [without myelopathy])                                    | Osteoarthritis          |
| Osteoarthritis   | XaE3C            | Lumbosacral spondylosis                                                          | Osteoarthritis          |
| Osteoarthritis   | X703k            | Lumbar spondylosis                                                               | Osteoarthritis          |
| Osteoarthritis   | N11C.            | Lumbosacral spondylosis with radiculopathy                                       | Osteoarthritis          |
| Osteoarthritis   | N11C0            | Single-level lumbosacral spondylosis with radiculopathy                          | Osteoarthritis          |
| Osteoarthritis   | N11C1            | Two-level lumbosacral spondylosis with radiculopathy                             | Osteoarthritis          |
| Osteoarthritis   | N11C2            | Multiple-level lumbosacral spondylosis with radiculopathy                        | Osteoarthritis          |
| Osteoarthritis   | N115.            | Lumbosacral spondylosis with myelopathy                                          | Osteoarthritis          |
| Osteoarthritis   | N1150            | Single-level lumbosacral spondylosis with myelopathy                             | Osteoarthritis          |

Table S3.1: Primary care READ codes used to identify patients with trial indications

| <b>Condition</b> | <b>Read.code</b> | <b>Description</b>                                                                                   | <b>condition_rename</b> |
|------------------|------------------|------------------------------------------------------------------------------------------------------|-------------------------|
| Osteoarthritis   | N1151            | Two-level lumbosacral spondylosis with myelopathy                                                    | Osteoarthritis          |
| Osteoarthritis   | N1152            | Multiple-level lumbosacral spondylosis with myelopathy                                               | Osteoarthritis          |
| Osteoarthritis   | XE1Ex            | Lumbosacral spondylosis without myelopathy                                                           | Osteoarthritis          |
| Osteoarthritis   | N1140            | Single-level lumbosacral spondylosis without myelopathy                                              | Osteoarthritis          |
| Osteoarthritis   | N1141            | Two-level lumbosacral spondylosis without myelopathy                                                 | Osteoarthritis          |
| Osteoarthritis   | N1142            | Multiple-level lumbosacral spondylosis without myelopathy                                            | Osteoarthritis          |
| Osteoarthritis   | N11y.            | Other spondyloses and allied disorders                                                               | Osteoarthritis          |
| Osteoarthritis   | Nyu62            | [X]Other spondylosis with myelopathy                                                                 | Osteoarthritis          |
| Osteoarthritis   | Nyu63            | [X]Other spondylosis with radiculopathy                                                              | Osteoarthritis          |
| Osteoarthritis   | Nyu64            | [X]Other spondylosis                                                                                 | Osteoarthritis          |
| Osteoarthritis   | XE1Ey            | Spondylosis NOS                                                                                      | Osteoarthritis          |
| Osteoarthritis   | N11z0            | Spondylosis without myelopathy, NOS                                                                  | Osteoarthritis          |
| Osteoarthritis   | N11z1            | Spondylosis with myelopathy, NOS                                                                     | Osteoarthritis          |
| Osteoarthritis   | N114.            | (Lumbosacral spondylosis [& without myelopathy]) or (degeneration of lumbar spine)                   | Osteoarthritis          |
| Osteoarthritis   | N11z.            | (Spondylosis NOS) or (osteoarthritis spine)                                                          | Osteoarthritis          |
| Osteoarthritis   | XE1HM            | (Spondyloses: [cervical] or [lumbar] or [sacral]) or (arthritis - spine) or (osteoarthritis - spine) | Osteoarthritis          |
| Osteoarthritis   | X703A            | Osteoarthritis of spinal facet joint                                                                 | Osteoarthritis          |
| Osteoarthritis   | X703F            | Osteoarthritis of first carpometacarpal joint                                                        | Osteoarthritis          |
| Osteoarthritis   | X703G            | Osteoarthritis of finger joint                                                                       | Osteoarthritis          |
| Osteoarthritis   | X703H            | Osteoarthritis of distal interphalangeal joint                                                       | Osteoarthritis          |
| Osteoarthritis   | N05zH            | Osteoarthritis NOS, of distal interphalangeal joint of finger                                        | Osteoarthritis          |
| Osteoarthritis   | X703I            | Osteoarthritis of proximal interphalangeal joint                                                     | Osteoarthritis          |
| Osteoarthritis   | N05zG            | Osteoarthritis NOS, of proximal interphalangeal joint of finger                                      | Osteoarthritis          |
| Osteoarthritis   | X703J            | Osteoarthritis of metacarpophalangeal joint of finger                                                | Osteoarthritis          |
| Osteoarthritis   | X7035            | Finger osteoarthritis NOS                                                                            | Osteoarthritis          |
| Osteoarthritis   | X703K            | Osteoarthritis of hip                                                                                | Osteoarthritis          |
| Osteoarthritis   | N05zJ            | Osteoarthritis NOS, of hip                                                                           | Osteoarthritis          |
| Osteoarthritis   | X703L            | Osteoarthritis of knee                                                                               | Osteoarthritis          |
| Osteoarthritis   | XaYQD            | Patellofemoral osteoarthritis                                                                        | Osteoarthritis          |
| Osteoarthritis   | N05zL            | Osteoarthritis NOS, of knee                                                                          | Osteoarthritis          |
| Osteoarthritis   | N0514            | Localised, primary osteoarthritis of the hand                                                        | Osteoarthritis          |
| Osteoarthritis   | N0524            | Localised, secondary osteoarthritis of the hand                                                      | Osteoarthritis          |
| Osteoarthritis   | N0534            | Localised osteoarthritis, unspecified, of                                                            | Osteoarthritis          |

Table S3.1: Primary care READ codes used to identify patients with trial indications

| Condition      | Read.code | Description                                                                                                                                        | condition_rename |
|----------------|-----------|----------------------------------------------------------------------------------------------------------------------------------------------------|------------------|
|                |           | the hand                                                                                                                                           |                  |
| Osteoarthritis | N0539     | Arthrosis of first carpometacarpal joint, unspecified                                                                                              | Osteoarthritis   |
| Osteoarthritis | XM1NQ     | Osteoarthritis of metacarpophalangeal joint                                                                                                        | Osteoarthritis   |
| Osteoarthritis | Xa3gQ     | Osteoarthritis - hand joint (Otto's pelvis) or (hip osteoarthritis NOS) or (localised osteoarthritis, unspecified, of the pelvic region and thigh) | Osteoarthritis   |
| Osteoarthritis | N0535     |                                                                                                                                                    | Osteoarthritis   |
| Osteoarthritis | N0507     | Heberden's nodes with arthropathy                                                                                                                  | Osteoarthritis   |
| Osteoarthritis | N0503     | Bouchard's nodes with arthropathy                                                                                                                  | Osteoarthritis   |
| Osteoarthritis | XE1DW     | Generalised osteoarthritis of the hand (Heberdens' nodes) or (Bouchards' nodes) or (generalised osteoarthritis of the hand)                        | Osteoarthritis   |
| Osteoarthritis | N0501     |                                                                                                                                                    | Osteoarthritis   |
| Osteoarthritis | N0614     | Traumatic arthropathy of the hand                                                                                                                  | Osteoarthritis   |
| Osteoarthritis | N061G     | Traumatic arthropathy of metacarpophalangeal joint                                                                                                 | Osteoarthritis   |
| Osteoarthritis | N061H     | Traumatic arthropathy of proximal interphalangeal joint of finger                                                                                  | Osteoarthritis   |
| Osteoarthritis | N061J     | Traumatic arthropathy of distal interphalangeal joint of finger                                                                                    | Osteoarthritis   |
| Osteoarthritis | N061K     | Traumatic arthropathy-hip                                                                                                                          | Osteoarthritis   |
| Osteoarthritis | N061M     | Traumatic arthropathy-knee                                                                                                                         | Osteoarthritis   |
| Osteoarthritis | N11y2     | Neuropathic spondylopathy                                                                                                                          | Osteoarthritis   |
| Osteoarthritis | N0604     | Kaschin-Beck disease of the hand                                                                                                                   | Osteoarthritis   |
| Osteoarthritis | N0544     | Oligoarticular osteoarthritis, unspecified, of hand                                                                                                | Osteoarthritis   |
| Osteoarthritis | N05zF     | Osteoarthritis NOS, of metacarpophalangeal joint                                                                                                   | Osteoarthritis   |
| Osteoarthritis | N05zL     | Osteoarthritis NOS, of knee                                                                                                                        | Osteoarthritis   |
| Osteoarthritis | XE1Dd     | Osteoarthritis NOS, of the hand                                                                                                                    | Osteoarthritis   |
| Osteoarthritis | X7034     | Thumb osteoarthritis NOS                                                                                                                           | Osteoarthritis   |
| Osteoarthritis | N05z4     | Osteoarthritis NOS: [hand] or [finger] or [thumb]                                                                                                  | Osteoarthritis   |
| Osteoarthritis | N05z5     | Osteoarthritis NOS: [pelvic region and/or thigh] or [hip]                                                                                          | Osteoarthritis   |
| Osteoarthritis | XE1DV     | Osteoarthrosis                                                                                                                                     | Osteoarthritis   |
| Osteoarthritis | Xalna     | Exacerbation of osteoarthritis                                                                                                                     | Osteoarthritis   |
| Osteoarthritis | X703Q     | Secondary osteoarthritis                                                                                                                           | Osteoarthritis   |
| Osteoarthritis | N050.     | Generalised osteoarthritis                                                                                                                         | Osteoarthritis   |
| Osteoarthritis | N0500     | Generalised osteoarthritis of unspecified site                                                                                                     | Osteoarthritis   |
| Osteoarthritis | N0502     | Generalised osteoarthritis of multiple sites                                                                                                       | Osteoarthritis   |
| Osteoarthritis | N050z     | Generalised osteoarthritis NOS                                                                                                                     | Osteoarthritis   |
| Osteoarthritis | N0505     | Secondary multiple arthrosis                                                                                                                       | Osteoarthritis   |
| Osteoarthritis | N0619     | Traumatic arthropathy of multiple sites                                                                                                            | Osteoarthritis   |
| Osteoarthritis | N0609     | Kaschin-Beck disease of multiple sites                                                                                                             | Osteoarthritis   |
| Osteoarthritis | X7038     | Idiopathic osteoarthritis                                                                                                                          | Osteoarthritis   |
| Osteoarthritis | N0506     | Erosive osteoarthrosis                                                                                                                             | Osteoarthritis   |
| Osteoarthritis | N054.     | Oligoarticular osteoarthritis,                                                                                                                     | Osteoarthritis   |

Table S3.1: Primary care READ codes used to identify patients with trial indications

| Condition          | Read.code | Description                                                                 | condition_rename   |
|--------------------|-----------|-----------------------------------------------------------------------------|--------------------|
|                    |           | unspecified                                                                 |                    |
| Osteoarthritis     | N0540     | Oligoarticular osteoarthritis, unspecified, of unspecified sites            | Osteoarthritis     |
| Osteoarthritis     | N0545     | Oligoarticular osteoarthritis, unspecified, of the pelvic region and thigh  | Osteoarthritis     |
| Osteoarthritis     | N0549     | Oligoarticular osteoarthritis, unspecified, of multiple sites               | Osteoarthritis     |
| Osteoarthritis     | N054z     | Osteoarthritis of more than one site, unspecified, NOS                      | Osteoarthritis     |
| Osteoarthritis     | XE1Da     | Osteoarthritis NOS                                                          | Osteoarthritis     |
| Osteoarthritis     | XE1Gm     | Osteoarthritis -multiple joint [Joint degeneration] or [osteoarthritis NOS] | Osteoarthritis     |
| Osteoarthritis     | N05z.     |                                                                             | Osteoarthritis     |
| Osteoarthritis     | X703E     | Osteoarthritis of wrist                                                     | Osteoarthritis     |
| Osteoarthritis     | N05zE     | Osteoarthritis NOS, of wrist                                                | Osteoarthritis     |
| Osteoarthritis     | XaEGd     | Localised, primary osteoarthritis of the wrist                              | Osteoarthritis     |
| Osteoarthritis     | N0515     | Localised, primary osteoarthritis of the pelvic region and thigh            | Osteoarthritis     |
| Osteoarthritis     | XE1DX     | Localised, secondary osteoarthritis of the pelvic region and thigh          | Osteoarthritis     |
| Osteoarthritis     | XE1DY     | Localised osteoarthritis, unspecified, of the pelvic region and thigh       | Osteoarthritis     |
| Osteoarthritis     | N0615     | Traumatic arthropathy of the pelvic region and thigh                        | Osteoarthritis     |
| Osteoarthritis     | N061E     | Traumatic arthropathy of distal radioulnar joint                            | Osteoarthritis     |
| Osteoarthritis     | N061F     | Traumatic arthropathy-wrist                                                 | Osteoarthritis     |
| Osteoarthritis     | N0605     | Kaschin-Beck disease of the pelvic region and thigh                         | Osteoarthritis     |
| Osteoarthritis     | N05zD     | Osteoarthritis NOS, of distal radioulnar joint                              | Osteoarthritis     |
| Osteoarthritis     | N05zE     | Osteoarthritis NOS, of wrist                                                | Osteoarthritis     |
| Osteoarthritis     | XE1De     | Osteoarthritis NOS, pelvic region/thigh                                     | Osteoarthritis     |
| Osteoarthritis     | N05z3     | Osteoarthritis NOS: [of the forearm] or [wrist]                             | Osteoarthritis     |
| Pulmonary fibrosis | H563.00   | idiopathic fibrosing alveolitis                                             | Pulmonary fibrosis |
| Pulmonary fibrosis | H563.11   | Hamman-Rich syndrome                                                        | Pulmonary fibrosis |
| Pulmonary fibrosis | H563.12   | cryptogenic fibrosing alveolitis                                            | Pulmonary fibrosis |
| Pulmonary fibrosis | H563.13   | Idiopathic pulmonary fibrosis                                               | Pulmonary fibrosis |
| Pulmonary fibrosis | H563100   | diffuse pulmonary fibrosis                                                  | Pulmonary fibrosis |
| Pulmonary fibrosis | H563200   | Pulmonary fibrosis                                                          | Pulmonary fibrosis |
| Pulmonary fibrosis | H563z     | Idiopathic fibrosing alveolitis                                             | Pulmonary fibrosis |
| Pulmonary fibrosis | H563z00   | idiopathic fibrosing alveolitis NOS                                         | Pulmonary fibrosis |
| Pulmonary fibrosis | X102v     | Usual interstitial pneumonitis                                              | Pulmonary fibrosis |
| Pulmonary fibrosis | X102w     | Desquamative interstitial pneum                                             | Pulmonary fibrosis |
| Pulmonary fibrosis | XE0Yb     | Cryptogenic fibrosing alveoliti                                             | Pulmonary fibrosis |
| Pulmonary fibrosis | XE0Zr     | Idiopath. fibrosing alveolitis                                              | Pulmonary fibrosis |

For migraine and for thromboembolism, primary care patents were only identified as having the indication if they were also taking anti-migraine medication (ATC code N02C) or anticoagulants (ATC code B01AA, B01AE or B01AF), respectively. These codes are shown under comorbidity definitions in the next section.
