# Supplementary material for: Representation of people with comorbidity and multimorbidity in clinical trials of novel drug therapies: an individual-level participant data analysis
Source: PubMed Central journal article supplement (PMC6849229; doi:10.1186/s12916-019-1427-1), 2019-11-12
Supplement: 12916_2019_1427_MOESM9_ESM.pdf [file 12916_2019_1427_MOESM9_ESM.pdf]

# 9 Proportion with each comorbidity for Trials and SAIL

Table S9.1 shows the proportion with each comorbidity. It corresponds to Figure 1 in the main manuscript.

Table S9.1: Proportion of participants/patients with each drug-defined comorbidity

| Cohort | Type of condition | nct_id      | Indication                | Pain | CV   | Arthritis | Affective | Acid-related | Airways | Diabetes | Osteoporosis | Thyroid | Stroke | Emboli | Inflammation | BPH  | Gout | Glaucoma | Urological | ED   | Antipsychotics | Epilepsy | Migraine | Parkinson's | Dementia |
|--------|-------------------|-------------|---------------------------|------|------|-----------|-----------|--------------|---------|----------|--------------|---------|--------|--------|--------------|------|------|----------|------------|------|----------------|----------|----------|-------------|----------|
| TRIAL  | Cardiovascular    | NCT00262600 | Atrial Fibrillation       | 11.9 | 11.5 | 13.7      | 5.2       | 9.7          | 19.7    | 3.7      | 9.9          | 5.8     | 4.4    | 6.8    | 2.7          | 1.6  | 1.4  | 0.8      | 1.1        | 0.3  | 1.3            | 0.9      |          |             |          |
| SAIL   | Cardiovascular    |             | Atrial Fibrillation       | 53.2 | 23.3 | 18.4      | 14.0      | 21.0         | 14.8    | 9.8      | 12.5         | 8.2     | 9.1    | 9.2    | 5.9          | 4.0  | 3.1  | 2.0      | 1.9        | 0.7  | 1.4            | 0.4      |          |             |          |
| TRIAL  | Cardiovascular    | NCT00734474 | Diabetes Mellitus, Type 2 | 12.6 | 6.4  | 3.1       | 5.9       | 11.1         | 11.6    | 3.7      | 0.5          | 9.2     | 0.3    | 4.1    | 2.9          | 2.6  | 1.4  | 0.3      | 2.7        | 0.7  | 1.1            | 0.4      | 0.7      | 0.9         |          |
| TRIAL  | Cardiovascular    | NCT00856284 | Diabetes Mellitus, Type 2 | 7.4  | 31.0 | 7.4       | 4.8       | 4.9          | 2.6     |          | 0.7          | 2.0     | 0.4    | 1.1    | 1.1          | 0.8  | 0.5  | 0.3      | 0.8        | 0.3  | 0.2            | 0.1      | 0.1      | 0.0         |          |
| TRIAL  | Cardiovascular    | NCT00968708 | Diabetes Mellitus, Type 2 | 30.5 | 9.3  | 7.9       | 5.2       | 28.3         | 1.9     | 7.4      | 0.2          | 2.7     | 7.6    | 7.0    | 3.3          | 2.7  | 18.5 | 0.5      | 0.6        | 1.2  | 0.9            | 1.2      | 1.5      | 0.4         |          |
| TRIAL  | Cardiovascular    | NCT00968812 | Diabetes Mellitus, Type 2 | 31.0 | 22.0 | 27.0      | 25.0      | 32.0         | 7.0     |          | 4.0          | 15.0    | 4.0    | 6.0    | 10.0         | 7.0  | 8.0  | 1.0      | 11.0       | 5.0  | 8.0            | 2.0      | 3.0      | 1.0         |          |
| TRIAL  | Cardiovascular    | NCT01064687 | Diabetes Mellitus, Type 2 | 22.1 | 17.4 | 0.2       | 7.8       | 19.0         | 11.3    | 10.6     | 0.7          | 9.5     | 2.1    | 6.6    | 3.1          | 2.1  | 3.2  | 1.1      | 6.7        | 0.6  | 1.2            | 1.6      | 1.0      | 0.2         |          |
| TRIAL  | Cardiovascular    | NCT01075282 | Diabetes Mellitus, Type 2 | 21.6 | 6.6  | 9.2       | 2.9       | 2.7          | 3.3     |          | 1.0          | 7.5     | 0.8    | 2.7    | 1.9          | 2.3  | 3.1  | 0.5      | 0.8        | 0.6  | 0.7            | 0.1      | 0.5      | 0.2         |          |
| TRIAL  | Cardiovascular    | NCT01081834 | Diabetes Mellitus, Type 2 | 4.0  | 27.0 | 6.0       | 26.0      | 28.0         | 10.0    |          | 6.0          | 13.0    | 1.0    | 7.0    | 12.0         | 1.0  | 8.0  | 6.0      | 6.0        | 1.0  | 2.0            | 1.0      | 1.0      | 1.0         |          |
| TRIAL  | Cardiovascular    | NCT01106625 | Diabetes Mellitus, Type 2 | 3.0  | 16.0 | 26.0      | 29.0      | 24.0         | 5.0     |          | 1.0          | 12.0    | 7.0    | 4.0    | 3.0          | 7.0  | 4.0  | 1.0      | 12.0       | 1.0  | 1.0            | 3.0      | 4.0      | 1.0         |          |
| TRIAL  | Cardiovascular    | NCT01106651 | Diabetes Mellitus, Type 2 | 30.0 | 23.0 | 19.0      | 28.0      | 26.0         | 11.0    |          | 2.0          | 16.0    | 7.0    | 5.0    | 15.0         | 11.0 | 9.0  | 7.0      | 16.0       | 1.0  | 9.0            | 2.0      | 5.0      | 1.0         |          |
| TRIAL  | Cardiovascular    | NCT01106677 | Diabetes Mellitus, Type 2 | 29.0 | 20.0 | 24.0      | 24.0      | 22.0         | 5.0     |          | 2.0          | 10.0    | 5.0    | 6.0    | 11.0         | 4.0  | 4.0  | 11.0     | 2.0        | 10.0 | 2.0            | 3.0      | 1.0      |             |          |
| TRIAL  | Cardiovascular    | NCT01106690 | Diabetes Mellitus, Type 2 | 2.0  | 21.0 | 3.0       | 32.0      | 14.0         | 14.0    |          | 3.0          | 22.0    | 4.0    | 3.0    | 13.0         | 7.0  | 7.0  | 4.0      | 15.0       | 4.0  | 3.0            | 1.0      | 1.0      | 1.0         |          |

Table S9.1: Proportion of participants/patients with each drug-defined comorbidity

| Cohort | Type of condition | nct_id      | Indication                                     | Pain  | CV    | Arthritis | Affective | Acid-related | Airways | Diabetes | Osteoporosis | Thyroid | Stroke | Emboli | Inflammation | BPH  | Gout | Glaucoma | Urologic | ED    | Antipsychotics | Epilepsy | Migraine | Parkinson's | Dementia |
|--------|-------------------|-------------|------------------------------------------------|-------|-------|-----------|-----------|--------------|---------|----------|--------------|---------|--------|--------|--------------|------|------|----------|----------|-------|----------------|----------|----------|-------------|----------|
| TRIAL  | Cardiovascular    | NCT01126580 | Diabetes Mellitus, Type 2                      | 18.26 | 2.7   | 18.2      | 12.38     | 1            | 6.8     | 1.1      | 8.4          | 1.5     | 2.6    | 1.2    | 3.6          | 2.9  | 0.9  | 0.6      | 1.7      | 0.6   | 1.0            | 1.5      | 0.2      |             |          |
| TRIAL  | Cardiovascular    | NCT01137812 | Diabetes Mellitus, Type 2                      | 29.02 | 9.02  | 25.02     | 27.03     | 3.07         | 0       | 2.0      | 14.03        | 3.0     | 2.0    | 9.0    | 12.05        | 5.0  | 3.0  | 11.06    | 6.0      | 13.01 | 1.0            | 6.0      | 1.0      |             |          |
| TRIAL  | Cardiovascular    | NCT01191268 | Diabetes Mellitus, Type 2                      | 25.67 | 9.72  | 5.61      | 6.51      | 10.96        | 6       | 0.8      | 10.32        | 4.3     | 3.5    | 2.4    | 3.4          | 5.0  | 1.0  | 3.0      | 1.7      | 1.6   | 0.8            | 0.6      | 0.2      |             |          |
| TRIAL  | Cardiovascular    | NCT01370005 | Diabetes Mellitus, Type 2                      | 15.4  | 11.87 | 6.8       | 7.0       | 7.0          | 0       | 0.6      | 9.3          | 3.5     | 2.9    | 2.1    | 3.8          | 5.0  | 1.1  | 2.2      | 0.4      | 0.8   | 0.4            | 1.0      | 0.0      |             |          |
| TRIAL  | Cardiovascular    | NCT01624259 | Diabetes Mellitus, Type 2                      | 19.56 | 9.82  | 0.98      | 8         | 7.3          | 5.7     | 0.2      | 7.8          | 2.0     | 3.2    | 2.5    | 4.7          | 3.3  | 0.3  | 1.3      | 0.7      | 0.7   | 1.3            | 1.2      | 0.0      |             |          |
| TRIAL  | Cardiovascular    | NCT01719003 | Diabetes Mellitus, Type 2                      | 3.7   | 17.04 | 4.1       | 1.1       | 2.0          | 1.8     | 0.2      | 0.7          | 0.0     | 1.3    | 0.7    | 0.6          | 0.4  | 0.2  | 0.4      | 0.1      | 0.3   | 0.1            | 0.1      | 0.0      |             |          |
| TRIAL  | Cardiovascular    | NCT01769378 | Diabetes Mellitus, Type 2                      | 7.0   | 65.71 | 2.06      | 0         | 4.3          | 2.7     | 0.0      | 6.7          | 2.7     | 1.7    | 2.0    | 2.7          | 2.3  | 0.0  | 0.0      | 0.0      | 0.3   | 0.3            | 0.7      | 0.0      |             |          |
| SAIL   | Cardiovascular    |             | Diabetes Mellitus, Type 2                      | 50.58 | 0.92  | 9.12      | 3.02      | 5.01         | 9.7     | 4.5      | 10.87        | 7.0     | 8.7    | 5.9    | 5.5          | 4.3  | 4.0  | 8.7      | 2.6      | 1.8   | 1.2            | 1.2      | 0.2      |             |          |
| TRIAL  | Cardiovascular    | NCT00153023 | Diabetes Mellitus, Type 2 (with renal disease) | 12.30 | 0     | 4.4       | 8.0       | 9.3          | 2.7     | 0.1      | 4.7          | 4.1     | 2.1    | 15.72  | 1.21         | 3.90 | 0.7  | 0.8      | 0.7      | 1.5   | 3.6            | 0.3      | 1.5      |             |          |
| TRIAL  | Cardiovascular    | NCT00153088 | Diabetes Mellitus, Type 2 (with renal disease) | 5.5   | 66.02 | 1.17      | 2         | 11.23        | 8       | 0.6      | 1.3          | 0.2     | 1.7    | 8.7    | 6.5          | 7.4  | 1.1  | 2.1      | 0.8      | 0.8   | 0.4            | 0.8      | 0.0      |             |          |
| TRIAL  | Cardiovascular    | NCT01164501 | Diabetes Mellitus, Type 2 (with renal disease) | 4.5   | 13.52 | 4         | 0.8       | 2.6          | 0.8     | 0.1      | 0.1          | 0.4     | 0.7    | 0.8    | 0.7          | 0.8  | 0.1  | 0.0      | 0.1      | 0.0   | 0.3            | 0.1      | 0.0      |             |          |
| TRIAL  | Cardiovascular    | NCT00274599 | Hypertension                                   | 23.8  | 28.41 | 2.47      | 6         | 9.7          | 6.8     | 1.5      | 3.6          | 0.1     | 5.3    | 2.6    | 2.5          | 1.1  | 0.5  | 1.4      | 0.9      | 1.2   | 1.4            | 0.1      | 0.4      |             |          |
| TRIAL  | Cardiovascular    | NCT00274612 | Hypertension                                   | 16.4  | 17.01 | 0.28      | 2         | 4.7          | 3.5     | 0.4      | 3.6          | 0.4     | 5.5    | 2.7    | 3.9          | 0.9  | 0.1  | 0.2      | 0.4      | 0.1   | 1.0            | 0.1      | 0.7      |             |          |
| TRIAL  | Cardiovascular    | NCT00926289 | Hypertension                                   | 7.7   | 5.6   | 4.7       | 3.3       | 3.3          | 9.5     | 0.8      | 2.1          | 0.7     | 0.6    | 1.3    | 1.5          | 2.7  | 0.3  | 0.4      | 0.1      | 0.2   | 1.6            | 0.1      | 0.2      |             |          |
| TRIAL  | Cardiovascular    | NCT02172586 | Hypertension                                   | 0.0   | 3.0   | 6.6       | 1.1       | 0.3          | 1.4     | 0.0      | 1.1          | 0.0     | 0.3    | 3.9    | 1.1          | 0.6  | 0.0  | 0.0      | 0.0      | 0.0   | 0.0            | 0.0      | 0.0      |             |          |
| TRIAL  | Cardiovascular    | NCT02175355 | Hypertension                                   | 8.8   | 13.57 | 6         | 5.9       | 4.6          | 5.4     | 1.3      | 2.6          | 0.8     | 3.8    | 1.8    | 1.8          | 1.3  | 0.3  | 0.0      | 0.5      | 0.2   | 0.4            | 0.4      | 0.2      |             |          |

Table S9.1: Proportion of participants/patients with each drug-defined comorbidity

| Cohort | Type of condition | nct_id      | Indication            | Pain                | CV                      | Arthritis                | Affective       | Acid-related    | Airways         | Diabetes | Osteoporosis | Thyroid     | Emboli  | Inflammatory | BPH | Gout | Glaucoma | Urological | ED  | Antipsychotics | Epilepsy | Migraine | Parkinson's | Dementia |
|--------|-------------------|-------------|-----------------------|---------------------|-------------------------|--------------------------|-----------------|-----------------|-----------------|----------|--------------|-------------|---------|--------------|-----|------|----------|------------|-----|----------------|----------|----------|-------------|----------|
| TRIAL  | Cardiovascular    | NCT02177396 | Hypertension          | 14.8                | 18.19.4                 | 5.9                      | 4.7             | 7.5             | 0.5             | 3.5      | 0.0          | 2.1         | 4.5     | 1.2          | 0.9 | 0.2  | 0.5      | 0.0        | 0.5 | 0.2            | 0.2      | 1.4      |             |          |
| TRIAL  | Cardiovascular    | NCT02177461 | Hypertension          | 2.4                 | 2.9                     | 6.1                      | 1.9             | 1.6             | 1.6             | 0.5      | 1.1          | 0.0         | 0.3     | 3.2          | 1.6 | 0.5  | 0.0      | 0.0        | 1.3 | 0.3            | 0.3      | 0.5      | 0.0         |          |
| TRIAL  | Cardiovascular    | NCT02242318 | Hypertension          | 10.8                | 11.09.6                 | 4.3                      | 6.5             | 5.4             | 0.4             | 2.7      | 0.0          | 4.9         | 1.1     | 4.3          | 0.9 | 0.0  | 0.0      | 0.2        | 0.4 | 1.6            | 0.7      | 0.2      |             |          |
| SAIL   | Cardiovascular    |             | Hypertension          | 46.0                | 30.219.122.917.916.56.2 | 9.8                      | 6.5             | 7.0             | 5.0             | 5.1      | 4.4          | 3.4         | 3.9     | 1.6          | 1.7 | 1.4  | 0.9      | 0.2        |     |                |          |          |             |          |
| TRIAL  | Cardiovascular    | NCT00291330 | Thromboembolism       | 34.544.525.815.40.0 | 9.4                     | 6.9                      | 2.3             | 6.1             | 6.4             | 3.0      | 2.6          | 3.0         | 0.7     | 0.9          | 1.7 | 2.0  | 0.6      | 1.2        | 0.4 |                |          |          |             |          |
| TRIAL  | Cardiovascular    | NCT00329238 | Thromboembolism       | 11.338.76.1         | 10.15.0                 | 5.5                      | 7.1             | 1.7             | 5.1             | 4.1      | 3.5          | 3.6         | 2.7     | 0.5          | 0.9 | 1.3  | 1.8      | 0.6        | 0.7 | 0.2            |          |          |             |          |
| TRIAL  | Cardiovascular    | NCT00558259 | Thromboembolism       | 7.7                 | 39.26.2                 | 9.8                      | 13.06.4         | 6.1             | 1.9             | 5.8      | 4.1          | 4.2         | 3.7     | 2.7          | 0.6 | 0.3  | 1.0      | 1.6        | 1.0 | 0.8            | 0.6      |          |             |          |
| TRIAL  | Cardiovascular    | NCT00680186 | Thromboembolism       | 29.042.023.213.60.1 | 8.7                     | 8.8                      | 1.7             | 5.4             | 5.4             | 3.6      | 2.2          | 4.0         | 0.5     | 1.0          | 1.0 | 1.2  | 0.6      | 1.3        | 1.5 |                |          |          |             |          |
| SAIL   | Cardiovascular    |             | Thromboembolism       | 61.761.626.123.50.0 | 24.912.610.810.5        | 11.66.2                  | 6.6             | 4.0             | 4.6             | 3.0      | 2.5          | 3.3         | 1.6     | 1.1          | 0.3 |      |          |            |     |                |          |          |             |          |
| TRIAL  | Inflammatory      | NCT00265096 | Arthritis, Psoriatic  | 18.013.0            | 9.0                     | 21.025.026.016.027.09.0  | 5.0             | 14.06.0         | 4.0             | 7.0      | 4.0          | 11.03.0     | 1.0     | 1.0          |     |      |          |            |     |                |          |          |             |          |
| TRIAL  | Inflammatory      | NCT01009086 | Arthritis, Psoriatic  | 32.037.0            | 1.0                     | 23.03.0                  | 12.09.0         | 19.05.0         | 4.0             | 8.0      | 1.0          | 1.0         | 5.0     | 1.0          | 4.0 | 1.0  | 1.0      | 1.0        |     |                |          |          |             |          |
| TRIAL  | Inflammatory      | NCT01077362 | Arthritis, Psoriatic  | 12.02.0             | 4.0                     | 31.08.0                  | 18.017.04.0     | 7.0             | 1.0             | 13.07.0  | 1.0          | 1.0         | 7.0     | 11.01.0      | 1.0 | 1.0  |          |            |     |                |          |          |             |          |
| SAIL   | Inflammatory      |             | Arthritis, Psoriatic  | 55.045.4            | 21.615.816.59.1         | 5.6                      | 7.8             | 3.0             | 2.4             | 3.7      | 1.9          | 2.4         | 2.4     | 1.4          | 1.8 | 2.4  | 0.5      | 0.1        |     |                |          |          |             |          |
| TRIAL  | Inflammatory      | NCT00106535 | Arthritis, Rheumatoid | 37.432.6            | 13.40.0                 | 4.3                      | 7.3             | 13.212.40.9     | 1.0             | 0.8      | 1.7          | 0.7         | 0.0     | 0.1          | 0.9 | 0.9  | 0.7      | 0.5        |     |                |          |          |             |          |
| TRIAL  | Inflammatory      | NCT00144508 | Arthritis, Rheumatoid | 8.2                 | 21.9                    | 6.2                      | 7.5             | 2.3             | 5.2             | 8.5      | 2.3          | 0.0         | 0.7     | 1.0          | 0.0 | 0.7  | 0.0      | 0.3        | 0.3 | 0.3            | 0.0      | 0.0      |             |          |
| TRIAL  | Inflammatory      | NCT00236028 | Arthritis, Rheumatoid | 16.014.0            | 4.0                     | 34.017.020.016.08.0      | 9.0             | 9.0             | 13.03.0         | 3.0      | 5.0          | 8.0         | 8.0     | 5.0          | 2.0 | 1.0  |          |            |     |                |          |          |             |          |
| TRIAL  | Inflammatory      | NCT00264537 | Arthritis, Rheumatoid | 20.012.0            | 3.0                     | 30.022.017.022.032.01.0  | 3.0             | 9.0             | 6.0             | 3.0      | 3.0          | 10.016.02.0 | 4.0     | 1.0          |     |      |          |            |     |                |          |          |             |          |
| TRIAL  | Inflammatory      | NCT00264550 | Arthritis, Rheumatoid | 22.015.0            | 6.0                     | 35.014.017.029.034.011.0 | 2.0             | 8.0             | 8.0             | 3.0      | 3.0          | 3.0         | 10.06.0 | 3.0          | 1.0 |      |          |            |     |                |          |          |             |          |
| TRIAL  | Inflammatory      | NCT00299546 | Arthritis, Rheumatoid | 28.033.0            | 21.05.0                 | 26.028.015.017.013.0     | 7.0             | 10.011.010.06.0 | 10.014.014.08.0 | 1.0      |              |             |         |              |     |      |          |            |     |                |          |          |             |          |
| TRIAL  | Inflammatory      | NCT00361335 | Arthritis, Rheumatoid | 27.019.0            | 8.0                     | 36.020.023.012.09.0      | 9.0             | 8.0             | 6.0             | 13.03.0  | 3.0          | 6.0         | 18.08.0 | 10.01.0      |     |      |          |            |     |                |          |          |             |          |
| TRIAL  | Inflammatory      | NCT00973479 | Arthritis, Rheumatoid | 6.0                 | 10.0                    | 19.029.08.0              | 11.025.021.05.0 | 2.0             | 12.03.0         | 1.0      | 1.0          | 3.0         | 4.0     | 1.0          | 1.0 | 1.0  |          |            |     |                |          |          |             |          |
| TRIAL  | Inflammatory      | NCT01007435 | Arthritis,            | 31.423.9            | 9.0                     | 0.1                      | 5.3             | 5.5             | 2.5             | 9.4      | 0.8          | 0.7         | 1.3     | 0.7          | 0.4 | 0.4  | 0.2      | 0.5        | 0.6 | 0.1            | 0.1      |          |             |          |

Table S9.1: Proportion of participants/patients with each drug-defined comorbidity

| Cohort | Type of condition | nct_id      | Indication                       | Pain  | CV    | Arthritis | Affective | Acid-related | Airways | Diabetes | Osteoporosis | Thyroid | Stroke | Emboli | Inflammatory | BPH   | Gout  | Glaucoma | Urological | ED  | Antipsychotics | Epilepsy | Migraine | Parkinson's | Dementia |
|--------|-------------------|-------------|----------------------------------|-------|-------|-----------|-----------|--------------|---------|----------|--------------|---------|--------|--------|--------------|-------|-------|----------|------------|-----|----------------|----------|----------|-------------|----------|
| TRIAL  | Inflammatory      | NCT01119859 | Rheumatoid Arthritis, Rheumatoid | 46.94 | 1.4   | 19.30     | 7.7       | 10.17        | 7       | 12.91    | 1.8          | 0.3     | 0.9    | 1.5    | 0.3          | 0.9   | 0.6   | 0.6      | 0.3        | 0.3 |                |          |          |             |          |
| TRIAL  | Inflammatory      | NCT01232569 | Rheumatoid Arthritis, Rheumatoid | 32.03 | 3.1   | 14.31     | 12.04     | 4.4          | 8.1     | 11.08    | 0.5          | 0.2     | 0.2    | 1.1    | 0.3          | 0.2   | 0.6   | 0.6      | 0.5        | 0.2 | 0.9            |          |          |             |          |
| SAIL   | Inflammatory      |             | Rheumatoid Arthritis, Rheumatoid | 66.05 | 1.9   | 20.72     | 22.02     | 1.38         | 9       | 20.01    | 17.4         | 2.8     | 2.5    | 3.2    | 3.8          | 1.6   | 1.5   | 1.5      | 2.4        | 0.9 | 0.2            |          |          |             |          |
| TRIAL  | Inflammatory      | NCT00036439 | Inflammatory bowel disease       | 17.06 | 0     | 14.07     | 17.01     | 14.02        | 1.02    | 1.02     | 0.29         | 0.1     | 0      | 0      | 0            | 14.07 | 9.0   | 4.0      | 4.0        | 1.0 | 3.0            | 1.0      | 1.0      | 1.0         | 1.0      |
| TRIAL  | Inflammatory      | NCT00094458 | Inflammatory bowel disease       | 19.03 | 6.02  | 31.01     | 13.01     | 0            | 3.0     | 6.0      | 5.0          | 6.0     | 5.0    | 3.0    | 1.0          | 3.0   | 3.0   | 8.0      | 9.0        | 1.0 | 1.0            | 1.0      | 1.0      | 1.0         | 1.0      |
| TRIAL  | Inflammatory      | NCT00096655 | Inflammatory bowel disease       | 21.03 | 0     | 21.01     | 10.08     | 6.0          | 22.02   | 6.03     | 3.01         | 2.0     | 14.07  | 11.04  | 4.0          | 10.07 | 10.07 | 3.0      | 9.0        | 1.0 | 1.0            | 1.0      | 1.0      | 1.0         | 1.0      |
| TRIAL  | Inflammatory      | NCT00207662 | Inflammatory bowel disease       | 25.04 | 0     | 16.01     | 16.01     | 12.05        | 0       | 19.03    | 1.09         | 4.0     | 9.0    | 5.0    | 3.0          | 1.0   | 7.0   | 12.01    | 13.01      | 0   | 1.0            | 1.0      | 1.0      | 1.0         | 1.0      |
| TRIAL  | Inflammatory      | NCT00207766 | Inflammatory bowel disease       | 23.05 | 0     | 23.01     | 12.01     | 1.02         | 1.01    | 12.02    | 4.01         | 8.05    | 1.0    | 10.05  | 5.0          | 1.0   | 5.0   | 4.0      | 8.0        | 1.0 | 1.0            | 1.0      | 1.0      | 1.0         | 1.0      |
| TRIAL  | Inflammatory      | NCT00487539 | Inflammatory bowel disease       | 14.09 | 0     | 22.02     | 18.01     | 15.01        | 15.01   | 13.02    | 6.07         | 11.04   | 9.0    | 2.0    | 2.0          | 4.0   | 10.01 | 10.01    | 0          | 1.0 | 1.0            | 1.0      | 1.0      | 1.0         | 1.0      |
| TRIAL  | Inflammatory      | NCT00488631 | Inflammatory bowel disease       | 10.08 | 0     | 20.02     | 19.01     | 13.01        | 16.01   | 13.01    | 1.08         | 6.0     | 6.0    | 8.0    | 2.0          | 2.0   | 5.0   | 15.06    | 0          | 1.0 | 1.0            | 1.0      | 1.0      | 1.0         | 1.0      |
| TRIAL  | Inflammatory      | NCT00783718 | Inflammatory bowel disease       | 20.81 | 12.14 | 11.32     | 3.72      | 7.7          | 4.2     | 3.6      | 5.1          | 0.7     | 0.9    | 0.8    | 0.4          | 0.2   | 0.1   | 1.0      | 0.2        | 0.4 | 0.9            | 0.0      | 0.0      | 0.0         | 0.0      |
| TRIAL  | Inflammatory      | NCT01224171 | Inflammatory bowel disease       | 33.71 | 10.86 | 16.63     | 3.74      | 1.1          | 1.4     | 4.1      | 3.4          | 1.0     | 0.5    | 0.5    | 1.2          | 0.0   | 0.2   | 1.7      | 1.0        | 1.9 | 0.7            | 0.0      | 0.0      | 0.0         | 0.0      |
| TRIAL  | Inflammatory      | NCT01369329 | Inflammatory bowel disease       | 15.02 | 4.01  | 15.04     | 7.0       | 2.0          | 2.0     | 14.03    | 4.0          | 1.0     | 6.0    | 3.0    | 1.0          | 3.0   | 8.0   | 2.0      | 3.0        | 1.0 | 1.0            | 1.0      | 1.0      | 1.0         | 1.0      |
| TRIAL  | Inflammatory      | NCT01369342 | Inflammatory bowel disease       | 11.02 | 6.01  | 18.03     | 10.05     | 0            | 7.0     | 7.0      | 1.0          | 5.0     | 6.0    | 9.0    | 1.0          | 3.0   | 3.0   | 3.0      | 9.0        | 4.0 | 1.0            | 1.0      | 1.0      | 1.0         | 1.0      |
| TRIAL  | Inflammatory      | NCT01369355 | Inflammatory bowel disease       | 13.02 | 5.01  | 16.03     | 4.09      | 0            | 4.0     | 4.0      | 11.02        | 5.0     | 3.0    | 7.0    | 2.0          | 3.0   | 6.0   | 5.0      | 4.0        | 1.0 | 1.0            | 1.0      | 1.0      | 1.0         | 1.0      |

Table S9.1: Proportion of participants/patients with each drug-defined comorbidity

| Cohort | Type of condition | nct_id      | Indication                            | Pain | CV   | Arthritis | Affective | Acid-related | Airways | Diabetes | Osteoporosis | Thyroid | Stroke | Emboli | Inflammatory | BPH  | Gout | Glaucoma | Urological | ED   | Antipsychotics | Epilepsy | Migraine | Parkinson's | Dementia |
|--------|-------------------|-------------|---------------------------------------|------|------|-----------|-----------|--------------|---------|----------|--------------|---------|--------|--------|--------------|------|------|----------|------------|------|----------------|----------|----------|-------------|----------|
| SAIL   | Inflammatory      |             | disease<br>Inflammatory bowel disease | 40.3 | 34.6 | 23.1      | 20.5      | 23.5         | 16.5    | 6.8      | 7.7          | 6.2     | 3.1    |        | 3.0          | 2.2  | 2.2  | 2.2      | 2.6        | 1.5  | 1.5            | 2.5      | 0.7      | 0.1         |          |
| TRIAL  | Inflammatory      | NCT00267969 | Psoriasis                             | 9.0  | 17.0 | 8.0       | 5.0       | 25.0         | 16.0    | 8.0      | 3.0          | 23.0    | 4.0    |        | 13.0         | 8.0  | 12.0 | 1.0      | 9.0        | 1.0  | 17.0           | 11.0     | 1.0      | 1.0         | 1.0      |
| TRIAL  | Inflammatory      | NCT00307437 | Psoriasis                             | 8.0  | 18.0 | 7.0       | 14.0      | 27.0         | 19.0    | 9.0      | 5.0          | 28.0    | 10.0   |        | 16.0         | 17.0 | 5.0  | 5.0      | 8.0        | 10.0 | 11.0           | 5.0      | 9.0      | 1.0         | 1.0      |
| TRIAL  | Inflammatory      | NCT01358578 | Psoriasis                             | 2.1  | 1.3  | 3.1       | 0.8       | 0.7          | 0.1     | 0.2      | 0.0          | 0.1     | 0.1    |        | 0.1          | 0.2  | 0.0  | 0.0      | 0.0        | 0.0  | 0.0            | 0.0      | 0.0      | 0.0         | 0.0      |
| TRIAL  | Inflammatory      | NCT01365455 | Psoriasis                             | 3.4  | 2.4  | 5.7       | 1.4       | 0.3          | 11.5    | 5.0      | 0.0          | 0.1     | 0.1    |        | 0.3          | 0.3  | 0.0  | 0.0      | 0.0        | 0.0  | 0.3            | 0.1      | 0.3      | 0.1         | 0.0      |
| TRIAL  | Inflammatory      | NCT01474512 | Psoriasis                             | 33.6 | 33.7 | 36.2      | 14.4      | 6.9          | 8.7     | 10.8     | 0.5          | 7.1     | 1.2    |        | 1.6          | 1.5  | 0.8  | 0.5      | 0.5        | 1.5  | 0.9            | 0.8      | 0.8      | 0.0         | 0.0      |
| TRIAL  | Inflammatory      | NCT01597245 | Psoriasis                             | 37.1 | 28.1 | 38.2      | 14.1      | 5.6          | 8.6     | 9.2      | 0.3          | 5.5     | 1.1    |        | 1.4          | 2.1  | 0.5  | 0.4      | 0.9        | 2.4  | 1.3            | 0.7      | 0.2      | 0.0         | 0.0      |
| TRIAL  | Inflammatory      | NCT01646177 | Psoriasis                             | 21.3 | 29.3 | 23.9      | 10.0      | 6.9          | 5.6     | 10.2     | 0.2          | 5.6     | 1.5    |        | 1.3          | 2.5  | 0.6  | 0.1      | 0.4        | 1.3  | 1.0            | 0.5      | 0.4      | 0.0         | 0.0      |
| SAIL   | Inflammatory      |             | Psoriasis                             | 32.5 | 35.7 | 27.1      | 18.6      | 14.0         | 15.0    | 6.9      | 3.0          | 6.0     | 2.4    |        | 2.0          | 2.1  | 1.7  | 1.9      | 2.0        | 1.6  | 1.4            | 1.9      | 0.6      | 0.1         | 0.1      |
| TRIAL  | Inflammatory      | NCT00410384 | Systemic Lupus Erythematosus          | 69.0 | 45.0 | 57.5      | 34.9      | 14.6         | 13.7    | 5.0      | 19.6         | 12.5    | 10.8   |        | 0.2          | 2.4  | 2.9  | 1.3      | 0.5        | 1.6  | 0.0            | 5.4      | 1.5      | 0.1         | 0.1      |
| TRIAL  | Inflammatory      | NCT00424476 | Systemic Lupus Erythematosus          | 55.9 | 41.9 | 46.0      | 19.1      | 17.7         | 8.2     | 2.8      | 7.5          | 8.4     | 5.2    |        | 0.1          | 2.2  | 1.7  | 0.3      | 0.2        | 1.5  | 0.0            | 1.5      | 0.1      | 0.0         | 0.0      |
| SAIL   | Inflammatory      |             | Systemic Lupus Erythematosus          | 57.6 | 51.9 | 38.1      | 28.6      | 24.5         | 22.1    | 5.0      | 21.2         | 14.5    | 9.8    |        | 0.8          | 1.3  | 2.0  | 3.8      | 1.4        | 1.5  | 3.5            | 5.0      | 0.9      | 0.3         | 0.3      |
| TRIAL  | Musculoskeletal   | NCT00265083 | Axial Spondyloarthritis               | 26.0 | 7.0  |           | 11.0      | 20.0         | 23.0    | 13.0     | 0.2          | 1.0     | 20.0   | 7.0    | 6.0          | 16.0 | 10.0 | 4.0      | 13.0       | 7.0  | 12.0           | 12.0     | 4.0      | 1.0         | 1.0      |
| TRIAL  | Musculoskeletal   | NCT01209702 | Axial Spondyloarthritis               | 13.7 | 20.6 |           | 12.7      | 7.0          | 6.9     | 2.9      | 3.9          | 4.9     | 0.0    |        | 1.0          | 0.0  | 2.0  | 0.0      | 0.0        | 1.0  | 2.0            | 0.0      | 0.0      | 1.0         | 1.0      |
| SAIL   | Musculoskeletal   |             | Axial Spondyloarthritis               | 55.0 | 41.8 |           | 19.4      | 13.9         | 14.7    | 7.1      | 5.3          | 4.0     | 2.8    |        | 5.4          | 2.7  | 2.2  | 2.3      | 3.6        | 1.1  | 1.2            | 1.7      | 0.4      | 0.2         | 0.2      |
| TRIAL  | Musculoskeletal   | NCT02183064 | Osteoarthritis                        |      | 52.2 |           | 28.7      | 24.1         | 15.1    | 18.0     | 6.1          | 14.1    | 11.1   | 8.9    | 4.8          | 2.2  | 3.3  | 2.0      | 0.2        | 0.6  | 1.4            | 2.1      | 1.4      | 1.9         | 1.9      |
| SAIL   | Musculoskeletal   |             | Osteoarthritis                        |      | 60.3 |           | 22.0      | 23.4         | 20.1    | 11.0     | 5.7          | 10.7    | 5.7    | 7.7    | 5.1          | 3.8  | 4.0  | 4.5      | 2.9        | 1.7  | 1.8            | 2.1      | 1.3      | 0.3         | 0.3      |
| TRIAL  | Musculoskeletal   | NCT00046254 | Osteoporosis                          | 42.8 | 58.4 | 17.8      | 30.9      | 15.0         | 9.9     | 13.7     |              | 8.8     | 9.9    | 7.4    | 1.9          | 1.7  | 4.9  | 2.5      | 0.1        | 5.5  | 2.4            | 0.7      | 3.0      | 4.0         | 4.0      |
| TRIAL  | Musculoskeletal   | NCT00049829 | Osteoporosis                          | 16.2 | 49.9 | 24.8      | 15.4      | 13.1         | 6.9     | 4.9      |              | 11.2    | 21.7   | 4.7    | 0.6          | 0.7  | 3.5  | 1.3      | 0.1        | 1.0  | 1.2            | 1.0      | 1.1      | 1.8         | 1.8      |
| TRIAL  | Musculoskeletal   | NCT00051558 | Osteoporosis                          | 30.8 | 51.7 | 55.9      | 21.0      | 38.7         | 16.1    | 5.8      |              | 14.0    | 2.6    | 90.9   | 1.2          | 1.6  | 0.5  | 0.7      | 1.9        | 3.5  | 1.2            | 0.7      | 2.1      | 2.1         | 2.1      |
| TRIAL  | Musculoskeletal   | NCT00100620 | Osteoporosis                          | 21.1 | 47.5 | 47.3      | 14.2      | 32.9         | 11.0    | 6.6      |              | 5.6     | 3.7    | 77.2   | 2.5          | 4.9  | 0.7  | 0.2      | 1.1        | 1.8  | 0.8            | 1.0      | 1.0      | 1.0         | 1.0      |
| TRIAL  | Musculoskeletal   | NCT00439244 | Osteoporosis                          | 34.0 | 49.5 | 30.8      | 19.7      | 16.3         | 10.4    | 4.9      |              | 16.0    | 2.2    | 7.0    | 0.0          | 1.2  | 5.3  | 3.2      | 0.0        | 2.9  | 1.0            | 2.4      | 1.5      | 1.5         | 1.5      |

Table S9.1: Proportion of participants/patients with each drug-defined comorbidity

| Cohort | Type of condition | nct_id      | Indication             | Pain | CV   | Arthritis | Affective | Acid-related | Airways | Diabetes | Osteoporosis | Thyroid | Stroke | Emboli | Inflammation | BPH  | Gout | Glaucoma | Urological | ED   | Antipsychotics | Epilepsy | Migraine | Parkinson's | Dementia |
|--------|-------------------|-------------|------------------------|------|------|-----------|-----------|--------------|---------|----------|--------------|---------|--------|--------|--------------|------|------|----------|------------|------|----------------|----------|----------|-------------|----------|
| TRIAL  | Musculoskeletal   | NCT00439647 | Osteoporosis           | 15.0 | 45.1 | 17.1      | 10.6      | 13.5         | 12.5    | 7.1      |              | 3.2     | 5.4    | 7.8    | 8.8          | 3.1  | 3.1  | 1.3      | 0.4        | 1.0  | 1.4            | 0.4      | 1.6      | 0.4         |          |
| TRIAL  | Musculoskeletal   | NCT00670501 | Osteoporosis           | 26.0 | 47.2 | 20.2      | 16.4      | 7.7          | 31.0    | 23.3     |              | 15.0    | 0.1    | 4.9    | 1.0          | 0.3  | 8.3  | 0.6      | 0.1        | 0.8  | 1.8            | 1.3      | 1.6      | 0.6         |          |
| SAIL   | Musculoskeletal   |             | Osteoporosis           | 59.7 | 57.5 | 53.2      | 42.4      | 33.0         | 92.4    | 16.7     |              | 14.4    | 6.5    | 11.7   | 2.0          | 1.9  | 5.2  | 5.5      | 0.8        | 2.4  | 2.8            | 2.0      | 1.7      | 0.6         |          |
| TRIAL  | Neurological      | NCT00216593 | Dementia               | 24.0 | 32.0 | 17.0      | 33.0      | 15.0         | 18.0    | 27.0     | 18.0         | 34.0    | 15.0   | 8.0    | 5.0          | 14.0 | 14.0 | 13.0     | 1.0        |      | 21.0           | 1.0      | 11.0     |             |          |
| TRIAL  | Neurological      | NCT00236431 | Dementia               | 7.0  | 30.0 | 9.0       | 18.0      | 3.0          | 21.0    | 24.0     | 27.0         | 10.0    | 14.0   | 10.0   | 18.0         | 15.0 | 15.0 | 12.0     | 14.0       |      | 7.0            | 7.0      | 4.0      |             |          |
| TRIAL  | Neurological      | NCT00236574 | Dementia               | 5.0  | 31.0 | 10.0      | 22.0      | 6.0          | 24.0    | 25.0     | 28.0         | 7.0     | 16.0   | 9.0    | 17.0         | 16.0 | 16.0 | 11.0     | 9.0        |      | 5.0            | 4.0      | 6.0      |             |          |
| TRIAL  | Neurological      | NCT00348140 | Dementia               | 30.4 | 45.6 | 29.4      | 31.4      | 6.9          | 1.8     | 2.1      | 5.5          | 8.3     | 2.8    | 2.1    | 3.5          | 2.0  | 1.8  | 2.0      | 0.5        |      | 0.0            | 0.3      | 1.3      |             |          |
| TRIAL  | Neurological      | NCT00348309 | Dementia               | 27.7 | 45.7 | 25.7      | 36.3      | 5.5          | 1.7     | 2.1      | 5.5          | 7.5     | 2.7    | 2.0    | 4.6          | 1.9  | 2.3  | 3.1      | 0.1        |      | 0.0            | 0.5      | 1.9      |             |          |
| TRIAL  | Neurological      | NCT00423085 | Dementia               | 3.1  | 46.2 | 14.2      | 19.8      | 19.4         | 2.4     | 9.0      | 1.7          | 1.0     | 0.7    | 3.1    | 3.8          | 2.4  | 2.4  | 5.2      | 0.0        |      | 2.1            | 0.0      | 2.1      |             |          |
| TRIAL  | Neurological      | NCT00428090 | Dementia               | 18.4 | 38.2 | 19.4      | 16.4      | 3.1          | 0.7     | 2.1      | 1.9          | 3.6     | 0.9    | 1.2    | 2.9          | 0.9  | 1.2  | 0.9      | 0.2        |      | 0.0            | 1.0      | 0.3      |             |          |
| SAIL   | Neurological      |             | Dementia               | 50.9 | 50.7 | 18.3      | 48.4      | 27.3         | 12.0    | 9.7      | 14.7         | 13.0    | 3.9    | 7.5    | 5.4          | 1.9  | 6.4  | 5.3      | 0.5        |      | 3.2            | 0.4      | 1.8      |             |          |
| TRIAL  | Neurological      | NCT00210912 | Migraine               |      | 11.0 | 4.0       | 23.0      | 12.0         | 6.0     | 10.0     | 8.0          | 25.0    | 1.0    | 11.0   | 9.0          | 5.0  | 1.0  | 8.0      | 5.0        | 5.0  | 19.0           |          | 5.0      | 1.0         |          |
| TRIAL  | Neurological      | NCT00212810 | Migraine               |      | 35.0 | 5.0       | 20.0      | 4.0          | 27.0    | 14.0     | 10.0         | 34.0    | 2.0    | 9.0    | 2.0          | 2.0  | 2.0  | 9.0      | 2.0        | 9.0  | 6.0            |          | 7.0      | 1.0         |          |
| TRIAL  | Neurological      | NCT00231595 | Migraine               |      | 1.0  | 12.0      | 15.0      | 1.0          | 28.0    | 19.0     | 23.0         | 30.0    | 1.0    | 11.0   | 1.0          | 19.0 | 1.0  | 15.0     | 1.0        | 1.0  | 22.0           |          | 13.0     | 1.0         |          |
| TRIAL  | Neurological      | NCT00236509 | Migraine               |      | 34.0 | 13.0      | 17.0      | 2.0          | 9.0     | 20.0     | 20.0         | 26.0    | 1.0    | 12.0   | 1.0          | 18.0 | 1.0  | 14.0     | 1.0        | 1.0  | 16.0           |          | 12.0     | 1.0         |          |
| TRIAL  | Neurological      | NCT00236561 | Migraine               |      | 28.0 | 11.0      | 13.0      | 2.0          | 6.0     | 1.0      | 24.0         | 1.0     | 1.0    | 1.0    | 1.0          | 12.0 | 11.0 | 1.0      | 11.0       | 20.0 |                | 1.0      | 1.0      |             |          |
| SAIL   | Neurological      |             | Migraine               |      | 40.8 | 39.3      | 28.3      | 14.5         | 18.7    | 2.6      | 1.9          | 7.3     | 0.9    | 6.1    | 0.8          | 0.5  | 0.8  | 2.6      | 0.9        | 1.7  | 4.7            |          | 0.5      | 0.0         |          |
| TRIAL  | Neurological      | NCT00402233 | Parkinson's disease    | 15.4 | 61.7 | 27.0      | 22.8      | 18.6         | 5.5     | 15.4     | 47.7         | 11.9    | 2.6    | 2.9    | 10.9         | 3.2  | 4.8  | 3.9      | 2.9        | 0.6  | 4.2            | 2.3      |          | 1.0         |          |
| TRIAL  | Neurological      | NCT00466167 | Parkinson's disease    | 3.5  | 29.5 | 6.2       | 22.8      | 8.9          | 1.0     | 6.2      | 0.6          | 2.5     | 0.4    | 0.8    | 3.7          | 0.8  | 3.7  | 1.0      | 0.2        | 1.0  | 0.8            | 0.4      |          | 1.0         |          |
| TRIAL  | Neurological      | NCT00479401 | Parkinson's disease    | 4.8  | 46.2 | 9.8       | 17.6      | 10.8         | 2.8     | 8.5      | 1.5          | 5.9     | 0.9    | 1.7    | 3.0          | 1.9  | 2.8  | 2.4      | 0.4        | 0.4  | 0.9            | 0.2      |          | 0.7         |          |
| SAIL   | Neurological      |             | Parkinson's disease    | 57.0 | 58.0 | 25.4      | 35.3      | 30.0         | 14.4    | 11.0     | 12.1         | 10.1    | 6.2    | 7.7    | 11.3         | 3.0  | 5.9  | 9.9      | 5.1        | 8.0  | 6.3            | 0.6      |          | 3.9         |          |
| TRIAL  | Neurological      | NCT00133198 | Restless legs syndrome | 30.4 | 44.3 | 44.1      | 17.8      | 14.2         | 29.3    | 2.0      | 4.3          | 18.8    | 0.9    | 7.5    | 2.6          | 0.9  | 1.2  | 0.6      | 1.4        | 0.0  | 0.6            | 3.2      |          | 0.6         |          |
| TRIAL  | Neurological      | NCT00472199 | Restless legs syndrome | 20.2 | 40.5 | 21.8      | 10.0      | 10.6         | 12.4    | 4.5      | 5.1          | 8.5     | 1.8    | 7.3    | 5.1          | 2.1  | 2.1  | 0.9      | 0.6        | 0.6  | 1.2            | 1.5      |          | 0.6         |          |
| SAIL   | Neurological      |             | Restless legs syndrome | 62.2 | 57.2 | 24.1      | 63.5      | 12.7         | 52.3    | 21.0     | 18.7         | 12.9    | 9.5    | 9.3    | 4.5          | 2.7  | 3.6  | 5.6      | 2.3        | 2.3  | 6.1            | 4.0      |          | 0.1         |          |
| TRIAL  | Respiratory       | NCT01159912 | Asthma                 | 20.3 | 13.2 | 17.5      | 4.3       | 6.0          |         | 4.3      | 0.6          | 2.3     | 0.3    | 2.9    | 0.0          | 0.9  | 0.6  | 0.0      | 0.0        | 0.9  | 0.0            | 1.1      | 0.0      | 0.0         |          |
| TRIAL  | Respiratory       | NCT01181895 | Asthma                 | 10.4 | 17.3 | 39.2      | 3.2       | 4.0          |         | 2.9      | 0.6          | 3.7     | 0.0    | 1.2    | 1.2          | 0.6  | 0.0  | 0.6      | 0.0        | 0.0  | 0.0            | 1.2      | 0.0      | 0.0         |          |
| TRIAL  | Respiratory       | NCT01436110 | Asthma                 | 6.8  | 7.7  | 5.7       | 2.3       | 3.1          |         | 3.4      | 0.3          | 1.7     | 0.0    | 0.6    | 0.6          | 0.0  | 0.0  | 0.3      | 0.0        | 0.3  | 0.0            | 0.0      | 0.0      | 0.0         |          |

Table S9.1: Proportion of participants/patients with each drug-defined comorbidity

| Cohort | Type of condition | nct_id      | Indication                             | Pain | CV   | Arthritis | Affective | Acid-related | Airways | Diabetes | Osteoporosis | Thyroid | Stroke | Emboli | Inflammatory | BPH | Gout | Glaucoma | Urological | ED   | Antipsychotics | Epilepsy | Migraine | Parkinson | Dementia |
|--------|-------------------|-------------|----------------------------------------|------|------|-----------|-----------|--------------|---------|----------|--------------|---------|--------|--------|--------------|-----|------|----------|------------|------|----------------|----------|----------|-----------|----------|
| TRIAL  | Respiratory       | NCT01691521 | Asthma                                 | 13.6 | 23.8 | 8.6       | 11.6      | 23.6         |         | 8.6      | 7.4          | 5.5     | 0.2    |        | 23.6         | 2.6 | 1.2  | 1.0      | 0.7        | 0.2  | 1.0            | 0.5      | 0.7      | 0.5       | 0.0      |
| SAIL   | Respiratory       |             | Asthma                                 | 39.5 | 35.5 | 25.4      | 21.0      | 18.3         |         | 6.5      | 4.5          | 6.4     | 2.8    |        | 6.6          | 2.4 | 2.0  | 1.7      | 2.3        | 1.7  | 1.7            | 1.7      | 2.6      | 0.6       | 0.1      |
| TRIAL  | Respiratory       | NCT00125918 | Hypertension, Pulmonary                | 22.2 | 39.7 | 13.8      | 26.8      | 27.6         | 17.5    | 6.9      | 19.0         |         |        |        | 17.7         | 2.2 | 7.6  | 2.7      | 1.0        | 0.2  | 2.0            | 2.2      | 2.0      | 1.0       | 0.2      |
| SAIL   | Respiratory       |             | Hypertension, Pulmonary                | 57.2 | 70.9 | 22.7      | 21.1      | 14.6         | 30.7    | 11.7     | 12.1         | 11.6    |        |        | 9.9          | 3.2 | 10.4 | 3.8      | 2.4        | 2.9  | 1.8            | 2.6      | 0.4      | 1.2       | 0.4      |
| TRIAL  | Respiratory       | NCT01316900 | Pulmonary Disease, Chronic Obstructive | 11.0 | 48.6 | 10.5      | 10.2      | 8.9          |         | 8.0      | 2.1          | 7.0     | 0.8    |        | 1.7          | 5.0 | 2.4  | 2.7      | 0.5        | 0.9  | 1.1            | 0.4      | 0.9      | 0.8       | 0.2      |
| TRIAL  | Respiratory       | NCT01316913 | Pulmonary Disease, Chronic Obstructive | 14.0 | 47.1 | 15.4      | 17.4      | 14.6         |         | 11.8     | 2.9          | 8.3     | 1.9    |        | 2.2          | 5.5 | 2.2  | 1.6      | 0.7        | 1.0  | 1.7            | 0.8      | 0.5      | 1.1       | 0.7      |
| TRIAL  | Respiratory       | NCT01772134 | Pulmonary Disease, Chronic Obstructive | 19.8 | 51.4 | 15.2      | 16.7      | 14.1         |         | 14.3     | 2.6          | 11.7    | 2.4    |        | 1.6          | 6.6 | 4.5  | 2.1      | 1.0        | 1.0  | 2.6            | 0.6      | 0.6      | 1.0       | 0.2      |
| TRIAL  | Respiratory       | NCT01957163 | Pulmonary Disease, Chronic Obstructive | 18.4 | 54.6 | 15.7      | 21.2      | 12.4         |         | 12.9     | 2.1          | 7.9     | 2.4    |        | 1.1          | 4.7 | 1.1  | 1.6      | 0.6        | 1.5  | 2.6            | 0.8      | 0.5      | 1.3       | 0.6      |
| TRIAL  | Respiratory       | NCT02119286 | Pulmonary Disease, Chronic Obstructive | 14.0 | 52.4 | 15.6      | 16.5      | 12.9         |         | 15.3     | 2.4          | 9.5     | 3.1    |        | 1.6          | 6.0 | 5.2  | 1.0      | 1.1        | 1.9  | 1.5            | 1.0      | 0.6      | 1.5       | 0.3      |
| TRIAL  | Respiratory       | NCT02177344 | Pulmonary Disease, Chronic Obstructive | 24.8 | 30.5 | 11.3      | 23.1      | 17.0         |         | 4.3      | 3.1          | 8.2     | 1.2    |        | 19.7         | 2.0 | 1.9  | 1.1      | 0.5        | 0.2  | 1.2            | 1.4      | 0.5      | 0.2       | 0.6      |
| TRIAL  | Respiratory       | NCT02236611 | Pulmonary Disease, Chronic Obstructive | 8.5  | 59.1 | 8.0       | 9.9       | 9.3          |         | 12.5     | 1.1          | 6.3     | 2.9    |        | 0.6          | 2.2 | 2.8  | 0.9      | 0.4        | 0.4  | 1.3            | 0.9      | 0.1      | 0.6       | 0.1      |
| SAIL   | Respiratory       |             | Pulmonary Disease, Chronic Obstructive | 58.4 | 61.2 | 29.1      | 26.8      | 30.3         |         | 12.5     | 1.1          | 10.0    | 8.0    |        | 10.7         | 7.1 | 4.2  | 4.1      | 3.8        | 3.2  | 2.6            | 2.3      | 1.5      | 1.2       | 0.3      |
| TRIAL  | Respiratory       | NCT01335464 | Pulmonary fibrosis                     | 21.6 | 50.8 | 15.2      | 14.6      | 30.9         | 18.5    | 16.7     | 6.0          | 9.3     | 1.0    |        | 0.0          | 8.4 | 5.8  | 3.7      | 1.2        | 2.3  | 0.8            | 2.1      | 0.2      | 0.6       | 0.2      |
| TRIAL  | Respiratory       | NCT01335477 | Pulmonary fibrosis                     | 19.9 | 48.3 | 15.5      | 14.8      | 29.5         | 24.0    | 19.3     | 4.6          | 9.1     | 0.2    |        | 0.0          | 6.9 | 4.4  | 3.5      | 1.1        | 3.1  | 2.2            | 0.7      | 0.2      | 1.6       | 1.1      |
| SAIL   | Respiratory       |             | Pulmonary fibrosis                     | 60.5 | 66.2 | 30.8      | 22.0      | 38.6         | 44.8    | 14.0     | 25.7         | 12.4    | 12.6   |        | 0.0          | 9.8 | 6.3  | 4.9      | 4.2        | 3.2  | 1.8            | 1.8      | 0.8      | 1.5       | 0.2      |
| TRIAL  | Urological        | NCT00384930 | Benign Prostatic Hyperplasia           | 12.4 | 44.5 | 24.8      | 8.2       | 9.6          | 5.2     | 7.7      | 0.2          | 4.0     | 0.7    |        | 6.1          |     | 1.9  | 2.8      |            | 32.1 | 10.5           | 0.7      | 0.9      | 0.9       | 0.0      |
| TRIAL  | Urological        | NCT00827242 | Benign Prostatic Hyperplasia           | 2.2  | 4.3  | 2.8       | 0.3       | 1.8          | 1.2     | 2.5      | 0.3          | 0.0     | 1.5    |        | 1.5          |     | 0.0  | 0.3      |            | 15.7 | 0.3            | 0.3      | 0.0      | 0.0       | 0.0      |
| TRIAL  | Urological        | NCT00848081 | Benign Prostatic                       | 13.5 | 86.5 | 27.0      | 11.9      | 16.0         | 8.8     | 14.2     | 0.9          | 11.3    | 3.1    |        | 6.3          |     | 6.3  | 4.7      |            | 30.8 | 0.3            | 0.9      | 1.9      | 0.6       | 2.2      |

Table S9.1: Proportion of participants/patients with each drug-defined comorbidity

| Cohort | Type of condition | nct_id      | Indication                                     | Pain | CV   | Arthritis | Affective | Acid-related | Airways | Diabetes | Osteoporosis | Thyroid | Stroke | Emboli | Inflammation | BPH | Gout | Glaucoma | Urological | ED  | Antipsychotics | Epilepsy | Migraine | Parkinson's | Dementia |
|--------|-------------------|-------------|------------------------------------------------|------|------|-----------|-----------|--------------|---------|----------|--------------|---------|--------|--------|--------------|-----|------|----------|------------|-----|----------------|----------|----------|-------------|----------|
| TRIAL  | Urological        | NCT00861757 | Hyperplasia<br>Benign Prostatic<br>Hyperplasia | 3.0  | 53.3 | 11.35     | 7         | 10.34        | 4.5     | 9.2      | 0.0          | 1.9     | 0.0    | 3.8    |              | 5.4 | 1.4  |          | 0.0        | 0.6 | 0.0            | 0.0      | 0.0      | 0.0         | 0.5      |
| TRIAL  | Urological        | NCT00970632 | Benign Prostatic<br>Hyperplasia                | 2.5  | 50.9 | 4.3       | 1.4       | 5.7          | 2.3     | 11.4     | 0.6          | 2.3     | 2.0    | 2.2    |              | 4.5 | 0.8  |          | 12.7       | 0.2 | 0.2            | 0.2      | 0.0      | 0.0         | 0.6      |
| SAIL   | Urological        |             | Benign Prostatic<br>Hyperplasia                | 43.3 | 64.1 | 29.5      | 15.1      | 25.2         | 18.9    | 12.5     | 3.5          | 4.6     | 8.5    | 7.1    |              | 5.9 | 5.5  |          | 8.3        | 1.6 | 2.1            | 0.9      | 1.9      | 1.9         | 0.4      |
| TRIAL  | Urological        | NCT00855582 | Erectile dysfunction                           | 7.8  | 44.1 | 12.4      | 5.4       | 7.8          | 5.1     | 11.4     | 1.2          | 5.1     | 0.8    | 2.6    |              | 2.5 | 2.6  |          |            | 0.5 | 0.3            | 0.8      | 0.5      | 0.8         |          |
| SAIL   | Urological        |             | Erectile dysfunction                           | 37.3 | 56.5 | 28.9      | 18.3      | 19.9         | 15.8    | 20.2     | 1.7          | 3.5     | 4.9    | 6.2    |              | 5.3 | 2.8  |          |            | 1.9 | 1.8            | 0.9      | 1.1      | 0.1         |          |
