# Supplementary material for: Representation of people with comorbidity and multimorbidity in clinical trials of novel drug therapies: an individual-level participant data analysis
Source: Springer Nature journal article supplement (doi:10.1186/s12916-019-1427-1), 2019-11-12
Supplement: MOESM6 [file 17378958]

# 6 Trial characteristics

## 6.1 Indication, start-date, drug and phase

Table S6.1 shows the trial characteristics, which were obtained from the US clinical trials register, clinicaltrials.gov. The database was accessed using in a database format via the Aggregate Analysis of ClinicalTrials.gov (AACT) tool from the Clinical Trials Transformation Initiative (<http://www.ctti-clinicaltrials.org>).

| Table S6.1: Trial characteristics |                      |            |         |                                       |                 |
|-----------------------------------|----------------------|------------|---------|---------------------------------------|-----------------|
| nct_id                            | sponsor              | start_date | phase   | conditions                            | medicine        |
| NCT00036439                       | Janssen              | 2002-02-01 | Phase 3 | Colitis, Ulcerative                   | Infliximab      |
| NCT00046254                       | Novartis             | 2002-02-01 | Phase 3 | Osteoporosis                          | zoledronic acid |
| NCT00049829                       | Novartis             | 2002-01-01 | Phase 3 | Osteoporosis                          | zoledronic acid |
| NCT00051558                       | Lilly                | 2002-11-01 | Phase 3 | Osteoporosis                          | Teriparatide    |
| NCT00094458                       | Janssen              | 2005-03-01 | Phase 3 | Crohn Disease                         | Infliximab      |
| NCT00096655                       | Janssen              | 2002-05-01 | Phase 3 | Colitis, Ulcerative                   | Infliximab      |
| NCT00100620                       | Novartis             | 2004-06-01 | Phase 3 | Osteoporosis                          | zoledronic acid |
| NCT00106535                       | Roche                | 2005-01-01 | Phase 3 | Arthritis, Rheumatoid                 | tocilizumab     |
| NCT00125918                       | Lilly                | 2005-08-01 | Phase 3 | Hypertension, Hypertension, Pulmonary | Tadalafil       |
| NCT00133198                       | Boehringer Ingelheim | 2004-04-01 | Phase 3 | Restless Legs Syndrome                | pramipexole     |
| NCT00144508                       | Roche                | 2003-03-01 | Phase 3 | Arthritis, Rheumatoid                 | tocilizumab     |
| NCT00153023                       | Boehringer Ingelheim | 2003-04-01 | Phase 4 | Diabetic Nephropathies, Hypertension  | telmisartan     |
| NCT00153088                       | Boehringer Ingelheim | 2003-01-01 | Phase 4 | Diabetic Nephropathies                | telmisartan     |
| NCT00207662                       | Janssen              | 2000-07-01 | Phase 3 | Crohn Disease                         | Infliximab      |
| NCT00207766                       | Janssen              | 2000-06-01 | Phase 3 | Crohn Disease                         | Infliximab      |

|             |                      |            |         |                             |                      |
|-------------|----------------------|------------|---------|-----------------------------|----------------------|
| NCT00210912 | Janssen              | 2003-09-01 | Phase 3 | Migraine Disorders          | Topiramate           |
| NCT00212810 | Janssen              | 2005-09-01 | Phase 4 | Migraine Disorders          | Topiramate           |
| NCT00216593 | Janssen              | 2003-12-01 | Phase 3 | Alzheimer Disease           | Galantamine          |
| NCT00231595 | Janssen              | 2001-03-01 | Phase 3 | Migraine Disorders          | Topiramate           |
| NCT00236028 | Janssen              |            | Phase 3 | Arthritis, Rheumatoid       | Infliximab           |
| NCT00236431 | Janssen              | 2001-05-01 | Phase 3 | Alzheimer Disease           | Galantamine          |
| NCT00236509 | Janssen              | 2001-02-01 | Phase 3 | Migraine Disorders          | Topiramate           |
| NCT00236561 | Janssen              | 2001-04-01 | Phase 3 | Migraine Disorders          | Topiramate           |
| NCT00236574 | Janssen              | 2001-05-01 | Phase 3 | Alzheimer Disease           | Galantamine          |
| NCT00262600 | Boehringer Ingelheim | 2005-11-01 | Phase 3 | Atrial Fibrillation, Stroke | dabigatran etexilate |
| NCT00264537 | Janssen              | 2005-12-01 | Phase 3 | Arthritis, Rheumatoid       | Golimumab            |
| NCT00264550 | Janssen              | 2005-12-01 | Phase 3 | Arthritis, Rheumatoid       | Golimumab            |
| NCT00265083 | Janssen              | 2005-12-01 | Phase 3 | Spondylitis, Ankylosing     | Golimumab            |
| NCT00265096 | Janssen              | 2005-12-01 | Phase 3 | Arthritis, Psoriatic        | Golimumab            |
| NCT00267969 | Janssen              | 2005-12-01 | Phase 3 | Psoriasis                   | Ustekinumab          |
| NCT00274599 | Boehringer Ingelheim | 2002-10-01 | Phase 4 | Hypertension                | telmisartan          |
| NCT00274612 | Boehringer Ingelheim | 2002-10-01 | Phase 4 | Hypertension                | telmisartan          |
| NCT00291330 | Boehringer Ingelheim | 2006-02-01 | Phase 3 | Venous Thromboembolism      | dabigatran etexilate |
| NCT00299546 | Janssen              | 2006-02-01 | Phase 3 | Arthritis, Rheumatoid       | Golimumab            |
| NCT00307437 | Janssen              | 2005-05-01 | Phase 3 | Psoriasis                   | Ustekinumab          |
| NCT00329238 | Boehringer Ingelheim | 2006-05-01 | Phase 3 | Venous Thromboembolism      | dabigatran etexilate |
| NCT00348140 | GSK                  | 2006-07-12 | Phase 3 | Alzheimer Disease           | rosiglitazone        |

|             |                      |            |                 |                               |                      |
|-------------|----------------------|------------|-----------------|-------------------------------|----------------------|
| NCT00348309 | GSK                  | 2006-07-06 | N/A             | Alzheimer Disease             | rosiglitazone        |
| NCT00361335 | Janssen              | 2006-09-01 | Phase 3         | Arthritis, Rheumatoid         | Golimumab            |
| NCT00384930 | Lilly                | 2006-08-01 | Phase 2/Phase 3 | Prostatic Hyperplasia         | Tadalafil            |
| NCT00402233 | Boehringer Ingelheim | 2006-11-01 | Phase 4         | Parkinson Disease             | pramipexole          |
| NCT00410384 | GSK                  | 2006-12-01 | Phase 3         | Lupus Erythematosus, Systemic | belimumab            |
| NCT00423085 | Novartis             | 2007-01-01 | Phase 3         | Alzheimer Disease             | rivastigmine         |
| NCT00424476 | GSK                  | 2007-05-01 | Phase 3         | Lupus Erythematosus, Systemic | belimumab            |
| NCT00428090 | GSK                  | 2007-02-27 | Phase 3         | Alzheimer Disease             | rosiglitazone        |
| NCT00439244 | Novartis             | 2006-12-01 | Phase 3         | Osteoporosis                  | zoledronic acid      |
| NCT00439647 | Novartis             | 2006-12-01 | Phase 3         | Osteoporosis                  | zoledronic acid      |
| NCT00466167 | Boehringer Ingelheim | 2007-04-01 | Phase 3         | Parkinson Disease             | Pramipexol           |
| NCT00472199 | Boehringer Ingelheim | 2007-05-01 | Phase 4         | Restless Legs Syndrome        | pramipexole          |
| NCT00479401 | Boehringer Ingelheim | 2007-05-01 | Phase 3         | Parkinson Disease             | pramipexole          |
| NCT00487539 | Janssen              | 2007-08-01 | Phase 2/Phase 3 | Colitis, Ulcerative           | Golimumab            |
| NCT00488631 | Janssen              | 2007-09-01 | Phase 3         | Colitis, Ulcerative           | Golimumab            |
| NCT00558259 | Boehringer Ingelheim | 2007-11-01 | Phase 3         | Venous Thromboembolism        | dabigatran etexilate |
| NCT00670501 | Lilly                | 1996-08-01 | Phase 3         | Osteoporosis                  | Teriparatide         |
| NCT00680186 | Boehringer Ingelheim | 2008-04-01 | Phase 3         | Venous Thromboembolism        | dabigatran etexilate |
| NCT00734474 | Lilly                | 2008-08-01 | Phase 2/Phase 3 | Diabetes Mellitus, Type 2     | Dulaglutide          |
| NCT00783718 | Takeda               | 2009-01-01 | Phase 3         | Colitis, Ulcerative           | vedolizumab          |
| NCT00827242 | Lilly                | 2009-01-   | Phase 3         | Prostatic Hyperplasia         | Tadalafil            |

|             |                      |            |         |                                                    |               |
|-------------|----------------------|------------|---------|----------------------------------------------------|---------------|
|             |                      | 01         |         |                                                    |               |
| NCT00848081 | Lilly                | 2009-03-01 | Phase 3 | Prostatic Hyperplasia                              | Tadalafil     |
| NCT00855582 | Lilly                | 2009-03-01 | Phase 3 | Prostatic Hyperplasia                              | Tadalafil     |
| NCT00856284 | Takeda               | 2009-03-01 | Phase 3 | Diabetes Mellitus, Type 2                          | alogliptin    |
| NCT00861757 | Lilly                | 2009-03-01 | Phase 3 | Prostatic Hyperplasia                              | Tadalafil     |
| NCT00926289 | Boehringer Ingelheim | 2009-06-01 | Phase 4 | Hypertension                                       | telmisartan   |
| NCT00968708 | Takeda               | 2009-09-01 | Phase 3 | Acute Coronary Syndrome, Diabetes Mellitus, Type 2 | alogliptin    |
| NCT00968812 | Janssen              | 2009-09-01 | Phase 3 | Diabetes Mellitus, Type 2                          | Canagliflozin |
| NCT00970632 | Lilly                | 2009-10-01 | Phase 3 | Prostatic Hyperplasia                              | Tadalafil     |
| NCT00973479 | Janssen              | 2009-09-01 | Phase 3 | Arthritis, Rheumatoid                              | Golimumab     |
| NCT01007435 | Roche                | 2009-10-31 | Phase 3 | Arthritis, Rheumatoid                              | Tocilizumab   |
| NCT01009086 | Janssen              | 2009-12-01 | Phase 3 | Arthritis, Psoriatic                               | Ustekinumab   |
| NCT01064687 | Lilly                | 2010-02-01 | Phase 3 | Diabetes Mellitus, Type 2                          | Dulaglutide   |
| NCT01075282 | Lilly                | 2010-02-01 | Phase 3 | Diabetes Mellitus, Type 2                          | Dulaglutide   |
| NCT01077362 | Janssen              | 2010-03-01 | Phase 3 | Arthritis, Psoriatic                               | Ustekinumab   |
| NCT01081834 | Janssen              | 2010-03-01 | Phase 3 | Diabetes Mellitus, Type 2                          | Canagliflozin |
| NCT01106625 | Janssen              | 2010-05-01 | Phase 3 | Diabetes Mellitus, Type 2                          | Canagliflozin |
| NCT01106651 | Janssen              | 2010-06-01 | Phase 3 | Diabetes Mellitus, Type 2                          | Canagliflozin |
| NCT01106677 | Janssen              | 2010-05-01 | Phase 3 | Diabetes Mellitus, Type 2                          | Canagliflozin |
| NCT01106690 | Janssen              | 2010-06-01 | Phase 3 | Diabetes Mellitus, Type 2                          | Canagliflozin |
| NCT01119859 | Roche                | 2010-05-01 | Phase 4 | Arthritis, Rheumatoid                              | Tocilizumab   |
| NCT01126580 | Lilly                | 2010-05-01 | Phase 3 | Diabetes Mellitus, Type 2                          | Dulaglutide   |

|             |                      |            |         |                                         |                      |
|-------------|----------------------|------------|---------|-----------------------------------------|----------------------|
| NCT01137812 | Janssen              | 2010-07-01 | Phase 3 | Diabetes Mellitus, Type 2               | Canagliflozin        |
| NCT01159912 | GSK                  | 2010-06-30 | Phase 3 | Asthma                                  | fluticasone furoate  |
| NCT01164501 | Boehringer Ingelheim | 2010-07-01 | Phase 3 | Diabetes Mellitus, Type 2               | empagliflozin        |
| NCT01181895 | GSK                  | 2010-09-01 | Phase 3 | Asthma                                  | vilanterol           |
| NCT01191268 | Lilly                | 2010-11-01 | Phase 3 | Diabetes Mellitus, Type 2               | Dulaglutide          |
| NCT01209702 | Roche                | 2010-09-01 | Phase 3 | Spondylitis, Ankylosing                 | Tocilizumab          |
| NCT01224171 | Takeda               | 2010-11-01 | Phase 3 | Crohn Disease                           | vedolizumab          |
| NCT01232569 | Roche                | 2011-03-01 | Phase 3 | Arthritis, Rheumatoid                   | Tocilizumab          |
| NCT01316900 | GSK                  | 2011-03-01 | Phase 3 | Pulmonary Disease, Chronic Obstructive  | umeclidinium bromide |
| NCT01316913 | GSK                  | 2011-03-01 | Phase 3 | Pulmonary Disease, Chronic Obstructive  | umeclidinium bromide |
| NCT01335464 | Boehringer Ingelheim | 2011-04-01 | Phase 3 | Idiopathic Interstitial Pneumonias      | nintedanib           |
| NCT01335477 | Boehringer Ingelheim | 2011-05-01 | Phase 3 | Idiopathic Interstitial Pneumonias      | nintedanib           |
| NCT01358578 | Novartis             | 2011-06-01 | Phase 3 | Psoriasis                               | secukinumab          |
| NCT01365455 | Novartis             | 2011-06-01 | Phase 3 | Psoriasis                               | secukinumab          |
| NCT01369329 | Janssen              | 2011-07-01 | Phase 3 | Crohn Disease                           | Ustekinumab          |
| NCT01369342 | Janssen              | 2011-07-01 | Phase 3 | Crohn Disease                           | Ustekinumab          |
| NCT01369355 | Janssen              | 2011-09-13 | Phase 3 | Crohn Disease                           | Ustekinumab          |
| NCT01370005 | Boehringer Ingelheim | 2011-06-01 | Phase 3 | Diabetes Mellitus, Type 2, Hypertension | empagliflozin        |
| NCT01436110 | GSK                  | 2011-09-01 | Phase 3 | Asthma                                  | fluticasone furoate  |
| NCT01474512 | Lilly                | 2011-11-01 | Phase 3 | Psoriasis                               | Ixekizumab           |
| NCT01597245 | Lilly                | 2012-05-01 | Phase 3 | Psoriasis                               | Ixekizumab           |
| NCT01624259 | Lilly                | 2012-06-   | Phase 3 | Diabetes Mellitus,                      | Dulaglutide          |

|             |                      |            |         |                                        |                      |
|-------------|----------------------|------------|---------|----------------------------------------|----------------------|
|             |                      | 01         |         | Type 2                                 |                      |
| NCT01646177 | Lilly                | 2012-07-01 | Phase 3 | Psoriasis                              | Ixekizumab           |
| NCT01691521 | GSK                  | 2012-10-08 | Phase 3 | Asthma                                 | mepolizumab          |
| NCT01719003 | Boehringer Ingelheim | 2012-10-01 | Phase 3 | Diabetes Mellitus, Type 2              | empagliflozin        |
| NCT01769378 | Lilly                | 2013-01-01 | Phase 3 | Diabetes Mellitus, Type 2              | Dulaglutide          |
| NCT01772134 | GSK                  | 2013-01-01 | Phase 3 | Pulmonary Disease, Chronic Obstructive | umeclidinium bromide |
| NCT01957163 | GSK                  | 2013-10-01 | Phase 3 | Pulmonary Disease, Chronic Obstructive | umeclidinium bromide |
| NCT02119286 | GSK                  | 2013-10-01 | Phase 3 | Pulmonary Disease, Chronic Obstructive | umeclidinium bromide |
| NCT02172586 | Boehringer Ingelheim | 2000-01-01 | Phase 4 | Hypertension                           | telmisartan          |
| NCT02175355 | Boehringer Ingelheim | 1999-10-01 | Phase 3 | Hypertension                           | telmisartan          |
| NCT02177344 | Boehringer Ingelheim | 1998-08-01 | Phase 3 | Pulmonary Disease, Chronic Obstructive | ipratropium bromide  |
| NCT02177396 | Boehringer Ingelheim | 1998-04-01 | Phase 3 | Hypertension                           | telmisartan          |
| NCT02177461 | Boehringer Ingelheim | 2000-04-01 | Phase 4 | Hypertension                           | telmisartan          |
| NCT02183064 | Boehringer Ingelheim | 1998-10-01 | Phase 3 | Osteoarthritis                         | meloxicam            |
| NCT02236611 | GSK                  | 2014-09-26 | Phase 4 | Pulmonary Disease, Chronic Obstructive | umeclidinium bromide |
| NCT02242318 | Boehringer Ingelheim | 2001-09-01 | Phase 4 | Hypertension                           | telmisartan          |

## 6.2 Age and sex distribution

Table S6.2 shows the number of participants of each sex and the distribution of age by sex for each trial. The age is summarised as the mean, standard deviation, and the range for eligibility criteria. For two trials (NCT00036439 and NCT00096655) the age was redacted from the IPD, and so the mean and standard deviation were taken from the published reports, under the assumption that men and women had the same mean age. Where the maximum age was not specified in the trial, we assumed for estimating the central tendency of the truncated normal distribution that this was 100 years old.

| Table S6.2: Age distribution by sex |                                |                                |
|-------------------------------------|--------------------------------|--------------------------------|
| nct_id                              | male                           | female                         |
| NCT00036439                         | N = 364; 41.9 (14.3); [18-100] | N = 364; 41.9 (14.3); [18-100] |

|             |                                 |                                 |
|-------------|---------------------------------|---------------------------------|
| NCT00046254 | N = 508; 72.7 (11); [50-100]    | N = 1619; 75.3 (10); [50-100]   |
| NCT00049829 |                                 | N = 7765; 73.2 (5.4); [65-89]   |
| NCT00051558 | N = 84; 56.8 (14); [21-100]     | N = 345; 56.1 (13.7); [21-100]  |
| NCT00094458 | N = 262; 36 (13); [21-99]       | N = 246; 37 (13); [21-99]       |
| NCT00096655 | N = 364; 40 (13.3); [18-100]    | N = 364; 40 (13.3); [18-100]    |
| NCT00100620 | N = 265; 56.3 (14.4); [18-85]   | N = 568; 53.6 (14.5); [18-85]   |
| NCT00106535 | N = 192; 53.7 (11.5); [18-100]  | N = 957; 51.6 (12.3); [18-100]  |
| NCT00125918 | N = 88; 56.8 (15.8); [12-100]   | N = 318; 52.2 (15.3); [12-100]  |
| NCT00133198 | N = 129; 50.2 (14.1); [18-80]   | N = 216; 52 (12.2); [18-80]     |
| NCT00144508 | N = 59; 55.6 (10); [20-100]     | N = 247; 52.2 (12.6); [20-100]  |
| NCT00152971 | N = 1099; 65.7 (9.5); [18-100]  | N = 1494; 66.4 (9.5); [18-100]  |
| NCT00153023 | N = 567; 61 (9.2); [30-80]      | N = 318; 61.5 (9.1); [30-80]    |
| NCT00153088 | N = 385; 61.3 (7.7); [30-74]    | N = 142; 60.7 (8.2); [30-74]    |
| NCT00168792 | N = 1290; 58.9 (11.6); [18-100] | N = 386; 65.6 (11.7); [18-100]  |
| NCT00168818 | N = 1509; 61.9 (10.8); [18-100] | N = 1953; 65.5 (10.5); [18-100] |
| NCT00207662 | N = 239; 37 (12); [18-100]      | N = 334; 37 (12); [18-100]      |
| NCT00207766 | N = 144; 39 (11); [18-100]      | N = 138; 39 (11); [18-100]      |
| NCT00210912 | N = 48; 40 (13); [18-100]       | N = 280; 37 (12); [18-100]      |
| NCT00212810 | N = 148; 41 (11); [18-65]       | N = 1066; 38 (11); [18-65]      |
| NCT00216593 | N = 81; 82 (6); [40-100]        | N = 334; 83 (6); [40-100]       |
| NCT00231595 | N = 63; 35 (15); [12-65]        | N = 420; 39 (13); [12-65]       |
| NCT00236028 | N = 303; 52 (12); [18-75]       | N = 746; 49 (13); [18-75]       |
| NCT00236431 | N = 462; 69 (9); [50-100]       | N = 533; 70 (9); [50-100]       |
| NCT00236509 | N = 55; 41 (13); [12-65]        | N = 429; 40 (11); [12-65]       |
| NCT00236561 | N = 112; 40 (12); [12-65]       | N = 448; 40 (12); [12-65]       |
| NCT00236574 | N = 456; 71 (8); [50-100]       | N = 606; 70 (9); [50-100]       |
| NCT00262600 | N = 11479; 70.6 (8.8); [18-100] | N = 6554; 72.8 (8); [18-100]    |
| NCT00264537 | N = 109; 51 (12); [18-100]      | N = 528; 49 (12); [18-100]      |
| NCT00264550 | N = 86; 54 (12); [18-100]       | N = 358; 50 (11); [18-100]      |
| NCT00265083 | N = 255; 38 (12); [18-100]      | N = 101; 42 (11); [18-100]      |
| NCT00265096 | N = 244; 47 (11); [18-100]      | N = 160; 47 (11); [18-100]      |
| NCT00267969 | N = 531; 46 (12); [18-100]      | N = 235; 44 (12); [18-100]      |
| NCT00274599 | N = 543; 52.9 (9.9); [19-100]   | N = 269; 52.1 (9.7); [19-100]   |
| NCT00274612 | N = 479; 53.4 (10.3); [18-100]  | N = 322; 54 (10.9); [18-100]    |
| NCT00291330 | N = 1493; 55.5 (14.4); [18-100] | N = 1068; 53.4 (17.8); [18-100] |
| NCT00299546 | N = 94; 55 (12); [18-100]       | N = 367; 54 (12); [18-100]      |

|             |                                 |                                 |
|-------------|---------------------------------|---------------------------------|
| NCT00307437 | N = 841; 46 (12); [18-100]      | N = 389; 46 (13); [18-100]      |
| NCT00329238 | N = 1746; 55.5 (13.9); [18-100] | N = 1118; 53.3 (16.8); [18-100] |
| NCT00348140 | N = 645; 72.8 (8.3); [50-90]    | N = 808; 73.4 (8); [50-90]      |
| NCT00348309 | N = 578; 73.5 (7.9); [50-90]    | N = 882; 74.6 (7.7); [50-90]    |
| NCT00361335 | N = 126; 53 (12); [18-100]      | N = 517; 49 (12); [18-100]      |
| NCT00384930 | N = 427; 62.2 (8.3); [45-100]   |                                 |
| NCT00402233 | N = 207; 62.9 (10.2); [31-100]  | N = 104; 61 (10.2); [31-100]    |
| NCT00410384 | N = 57; 42 (12.9); [18-100]     | N = 769; 40.1 (11.4); [18-100]  |
| NCT00423085 | N = 92; 74 (7.3); [50-85]       | N = 196; 74.9 (7.4); [50-85]    |
| NCT00424476 | N = 44; 33.6 (9.6); [18-100]    | N = 823; 35.6 (11.1); [18-100]  |
| NCT00428090 | N = 216; 72.2 (7.7); [50-90]    | N = 364; 72.5 (8.6); [50-90]    |
| NCT00439244 |                                 | N = 412; 65.1 (9.1); [45-89]    |
| NCT00439647 | N = 1199; 65.8 (8.6); [50-85]   |                                 |
| NCT00464269 | N = 198; 37.4 (12.4); [16-70]   | N = 202; 37.9 (12.5); [16-70]   |
| NCT00466167 | N = 285; 61.3 (10); [32-100]    | N = 233; 61.8 (9.9); [32-100]   |
| NCT00472199 | N = 133; 55.7 (12.8); [18-85]   | N = 198; 57.7 (11.5); [18-85]   |
| NCT00479401 | N = 299; 61.5 (9.9); [30-100]   | N = 240; 61.7 (9.5); [30-100]   |
| NCT00487539 | N = 596; 40 (11); [18-100]      | N = 469; 40 (13); [18-100]      |
| NCT00488631 | N = 700; 40 (14); [18-100]      | N = 528; 40 (13); [18-100]      |
| NCT00490035 | N = 228; 36.9 (12.9); [16-70]   | N = 171; 36.5 (13.3); [16-70]   |
| NCT00552058 | N = 195; 36.7 (12.7); [18-75]   | N = 244; 38 (12); [18-75]       |
| NCT00558259 | N = 752; 56.2 (14.2); [18-100]  | N = 600; 55.4 (16.5); [18-100]  |
| NCT00623623 | N = 1509; 57.9 (11.8); [18-100] | N = 402; 65.9 (12.5); [18-100]  |
| NCT00657150 | N = 987; 60.3 (11.8); [18-100]  | N = 1068; 63.8 (10.8); [18-100] |
| NCT00670501 |                                 | N = 1732; 68.9 (7); [30-85]     |
| NCT00680186 | N = 1568; 54.3 (15.4); [18-100] | N = 1017; 55.7 (17.3); [18-100] |
| NCT00694382 | N = 1930; 60.3 (10.4); [18-100] | N = 1282; 58.5 (10.8); [18-100] |
| NCT00734474 | N = 559; 53.5 (9.8); [18-75]    | N = 643; 53.7 (9.9); [18-75]    |
| NCT00783718 | N = 525; 39.8 (13.1); [18-80]   | N = 370; 39.8 (13.1); [18-80]   |
| NCT00827242 | N = 325; 64.1 (9.2); [45-100]   |                                 |
| NCT00848081 | N = 318; 66.6 (9.2); [45-100]   |                                 |
| NCT00855582 | N = 606; 62.1 (8.1); [45-100]   |                                 |
| NCT00856284 | N = 1312; 55.5 (9.8); [18-80]   | N = 1327; 55.3 (9.6); [18-80]   |
| NCT00861757 | N = 629; 62.5 (7.8); [45-100]   |                                 |
| NCT00926289 | N = 479; 55.1 (11.5); [18-100]  | N = 413; 59.2 (11.1); [18-100]  |
| NCT00968708 | N = 3674; 59.8 (9.7); [18-100]  | N = 1736; 63.3 (9.9); [18-100]  |



|             |                                |                                 |
|-------------|--------------------------------|---------------------------------|
| NCT00968812 | N = 757; 56 (9); [18-80]       | N = 695; 56 (9); [18-80]        |
| NCT00970632 | N = 511; 63 (8.2); [45-100]    |                                 |
| NCT00973479 | N = 109; 53 (12); [18-100]     | N = 483; 52 (12); [18-100]      |
| NCT01007435 | N = 294; 53 (12.8); [18-100]   | N = 1105; 49.3 (13.4); [18-100] |
| NCT01009086 | N = 330; 46 (11); [18-100]     | N = 285; 49 (13); [18-100]      |
| NCT01064687 | N = 571; 55.5 (9.8); [18-100]  | N = 407; 54.6 (9.8); [18-100]   |
| NCT01075282 | N = 421; 56.7 (9.2); [18-100]  | N = 408; 55.7 (9.7); [18-100]   |
| NCT01077362 | N = 148; 47 (11); [18-100]     | N = 164; 49 (12); [18-100]      |
| NCT01081834 | N = 302; 54 (11); [18-80]      | N = 376; 54 (11); [18-80]       |
| NCT01087762 | N = 200; 40.1 (11.6); [18-100] | N = 125; 38.9 (11.7); [18-100]  |
| NCT01087788 | N = 183; 45.9 (10.2); [18-100] | N = 226; 48.3 (11.3); [18-100]  |
| NCT01106625 | N = 239; 57 (9); [18-80]       | N = 230; 56 (9); [18-80]        |
| NCT01106651 | N = 396; 64 (6); [55-80]       | N = 320; 63 (6); [55-80]        |
| NCT01106677 | N = 605; 55 (10); [18-80]      | N = 679; 55 (9); [18-80]        |
| NCT01106690 | N = 217; 58 (10); [18-80]      | N = 127; 55 (10); [18-80]       |
| NCT01119859 | N = 63; 55.6 (12.1); [18-100]  | N = 263; 53.4 (12.8); [18-100]  |
| NCT01126580 | N = 353; 55.7 (9.9); [18-100]  | N = 454; 54.6 (10.7); [18-100]  |
| NCT01137812 | N = 422; 56 (9); [18-100]      | N = 333; 57 (10); [18-100]      |
| NCT01159912 | N = 144; 37.5 (16.9); [12-100] | N = 205; 42.6 (15.9); [12-100]  |
| NCT01164501 | N = 432; 64.1 (8.8); [18-100]  | N = 309; 63.6 (8.9); [18-100]   |
| NCT01181895 | N = 143; 39 (17.1); [12-100]   | N = 204; 42.9 (16.9); [12-100]  |
| NCT01191268 | N = 475; 59.1 (9.6); [18-100]  | N = 417; 58.1 (8.7); [18-100]   |
| NCT01209702 | N = 76; 41.6 (12); [18-100]    | N = 26; 43.8 (11.8); [18-100]   |
| NCT01224171 | N = 180; 36.8 (12.7); [18-80]  | N = 236; 37.9 (12.7); [18-80]   |
| NCT01232569 | N = 100; 54.7 (11.2); [18-100] | N = 556; 51.6 (11.5); [18-100]  |
| NCT01264939 | N = 94; 44.6 (14.3); [12-75]   | N = 242; 42.6 (14.1); [12-75]   |
| NCT01287117 | N = 87; 39.4 (14.9); [12-75]   | N = 232; 42 (14.4); [12-75]     |
| NCT01292473 | N = 78; 45.1 (13.4); [12-75]   | N = 245; 41.7 (13.7); [12-75]   |
| NCT01316900 | N = 585; 63.5 (8.7); [40-100]  | N = 261; 61.6 (9.6); [40-100]   |
| NCT01316913 | N = 592; 65.6 (8.2); [40-100]  | N = 280; 62.7 (8.6); [40-100]   |
| NCT01335464 | N = 415; 66.7 (8.2); [40-100]  | N = 99; 67.7 (8.9); [40-100]    |
| NCT01335477 | N = 428; 66.8 (7.8); [40-100]  | N = 121; 66.2 (7.6); [40-100]   |
| NCT01358578 | N = 722; 44.3 (12.6); [18-100] | N = 298; 43.6 (14.1); [18-100]  |
| NCT01365455 | N = 474; 44.7 (13); [18-100]   | N = 220; 45.5 (13.7); [18-100]  |
| NCT01369329 | N = 329; 38 (13); [18-100]     | N = 440; 37 (12); [18-100]      |
| NCT01369342 | N = 298; 38 (13); [18-99]      | N = 342; 41 (14); [18-99]       |

|             |                                 |                                 |
|-------------|---------------------------------|---------------------------------|
| NCT01369355 | N = 627; 38 (13); [18-99]       | N = 782; 39 (13); [18-99]       |
| NCT01370005 | N = 496; 60.3 (8.6); [18-100]   | N = 329; 60.1 (9.6); [18-100]   |
| NCT01436110 | N = 118; 32 (17.2); [12-100]    | N = 233; 39 (15.9); [12-100]    |
| NCT01474512 | N = 883; 45.7 (12.7); [18-100]  | N = 413; 45.7 (13.4); [18-100]  |
| NCT01597245 | N = 819; 45.1 (12.8); [18-100]  | N = 402; 44.8 (13.6); [18-100]  |
| NCT01624259 | N = 287; 56.3 (9.2); [18-100]   | N = 312; 56.2 (10); [18-100]    |
| NCT01646177 | N = 914; 45.6 (12.9); [18-100]  | N = 427; 46 (13.4); [18-100]    |
| NCT01691521 | N = 247; 50.2 (14.1); [12-100]  | N = 329; 50.1 (14.5); [12-100]  |
| NCT01719003 | N = 811; 53 (10.7); [18-100]    | N = 607; 52 (11.2); [18-100]    |
| NCT01769378 | N = 133; 56.8 (9.8); [18-100]   | N = 167; 57.7 (9.6); [18-100]   |
| NCT01772134 | N = 409; 64.3 (8.4); [40-100]   | N = 208; 61 (8); [40-100]       |
| NCT01957163 | N = 407; 64.6 (8.4); [40-100]   | N = 212; 64 (7.6); [40-100]     |
| NCT02119286 | N = 391; 63.7 (8.3); [40-100]   | N = 229; 61.6 (8); [40-100]     |
| NCT02172586 | N = 256; 51.4 (10); [18-100]    | N = 106; 54.7 (9); [18-100]     |
| NCT02175355 | N = 449; 62 (11.2); [35-84]     | N = 590; 63.8 (10.6); [35-84]   |
| NCT02177344 | N = 370; 66.1 (8.6); [40-100]   | N = 275; 65.1 (8.4); [40-100]   |
| NCT02177396 | N = 290; 53.8 (10.1); [18-100]  | N = 136; 52.4 (9.5); [18-100]   |
| NCT02177461 | N = 181; 70.9 (5.6); [65-100]   | N = 192; 70.5 (4.7); [65-100]   |
| NCT02181985 | N = 4667; 59 (11.8); [18-100]   | N = 1424; 66.1 (11.7); [18-100] |
| NCT02181998 | N = 1258; 60.1 (12.1); [18-100] | N = 372; 68.9 (12.1); [18-100]  |
| NCT02183064 | N = 432; 63.5 (11.8); [18-100]  | N = 888; 63.9 (11.5); [18-100]  |
| NCT02236611 | N = 707; 63.8 (8.1); [40-100]   | N = 330; 64.7 (8.7); [40-100]   |
| NCT02242318 | N = 272; 53.4 (9.6); [18-100]   | N = 174; 53.4 (10.6); [18-100]  |

## 6.3 Eligibility criteria

Trial eligibility criteria can be obtained from [clinicaltrials.gov](https://clinicaltrials.gov). As exemplars, criteria for the first 3 trials is shown below (Table S6.3).

Table S6.3: Eligibility criteria

**nct\_id**            **criteria**

NCT02242318 Inclusion Criteria:

1. Mild-to-moderate hypertension defined as a mean seated diastolic blood pressure of  $\geq$  95 mmHg and  $\leq$  109 mmHg, measured by manual cuff sphygmomanometer, at Visit 2
2. 24-hour mean DBP of  $\geq$  85 mmHg at Visit 3 as measured by ABPM

3. Age 18 years or older

4. Ability to stop any current antihypertensive therapy without risk to the patient (investigator's discretion)

5. Patient's written informed consent in accordance with Good Clinical Practice (GCP) and local legislation

Exclusion Criteria:

1. Pre-menopausal women (last menstruation  $\geq$  1 year prior to start of run-in period) who

1. are not surgically sterile,

2. are nursing,

3. are of child-bearing potential and are NOT practising acceptable methods of birth control, or do NOT plan to continue practising an acceptable method throughout the study. Acceptable methods of birth control include oral, implantable or injectable contraceptives and Intra Uterine Devices (IUD)

2. Known or suspected secondary hypertension

3. Mean sitting SBP  $\geq$  180 mmHg or mean sitting DBP  $\geq$  110 mmHg during any visit of the placebo run-in period

4. Hepatic and/or renal dysfunction as defined by the following laboratory parameters:

1. Serum Glutamate-Pyruvate-Transaminase (Alanine Aminotransferase) (SGPT (ALT)) or Serum Glutamate-Oxaloacetate-Transaminase (Aspartate Aminotransferase) (SGOT (AST)) > than 2 times the upper limit of normal range,

2. Serum creatinine > 2.3 mg/dL (or > 203  $\mu$ mol/l)

5. Bilateral renal artery stenosis, renal artery stenosis in a solitary kidney, patients postrenal transplant or with only one kidney
6. Clinically relevant sodium depletion, hypokalaemia or hyperkalaemia
7. Uncorrected volume depletion
8. Primary aldosteronism
9. Hereditary fructose intolerance
10. Biliary obstructive disorders
11. Patients who have previously experienced symptoms characteristic of angioedema during treatment with ACE inhibitors or angiotensin II receptor antagonists
12. History of drug or alcohol dependency within six months prior to start of run-in period
13. Concomitant administration of any medications known to affect blood pressure, except medication allowed by the protocol
14. Any investigational therapy within one month of signing the informed consent form
15. Congestive heart failure (New York Heart Association (NYHA) functional class Congestive Heart Failure (CHF III-IV))
16. Unstable angina within the past three months prior to start of run-in period
17. Stroke within the past six months prior to start of run-in period
18. Myocardial infarction or cardiac surgery within the past three months prior to start of run-in period

19. Percutaneous Transluminal Coronary Angioplasty (PTCA) within the past three months prior to start of run-in period
20. Sustained ventricular tachycardia, atrial fibrillation, atrial flutter or other clinically relevant cardiac arrhythmias as determined by the investigator
21. Hypertrophic obstructive cardiomyopathy, aortic stenosis, hemodynamically relevant stenosis of the aortic or mitral valve
22. Patients with insulin-dependent diabetes mellitus whose diabetes has not been stable and controlled for at least the past three months as defined by an HbA1C  $\geq 10\%$
23. Night shift workers who routinely sleep during the daytime and whose work hours include midnight to 4:00 Ante Meridiem (AM)
24. Known hypersensitivity to any component of the formulations
25. Any clinical condition which, in the opinion of the investigator would not allow safe completion of the protocol and safe administration of trial medication
26. Inability to comply with the protocol

**NCT02236611 Inclusion Criteria:**

- Type of subject: outpatient
- Informed Consent: a signed and dated written informed consent prior to study participation
- Age: subjects 40 years of age or older at Visit 1.
- Gender: male and female subjects are eligible to participate in the study. A female is eligible to enter and participate in the study if she is of: Non-child bearing potential i.e., physiologically incapable of becoming pregnant, including any female

who is post-menopausal or surgically sterile. Surgically sterile females are defined as those with a documented hysterectomy and/or bilateral oophorectomy or tubal ligation. Post-menopausal females are defined as being amenorrhoeic for greater than 1 year with an appropriate clinical profile, eg, age appropriate, > 45 years, in the absence of hormone replacement therapy OR child bearing potential, has a negative pregnancy test at screening, and agrees to one of the acceptable contraceptive methods used consistently and correctly i.e., in accordance with the approved product label and the instructions of the physician for the duration of the study - screening to follow-up contact.

- Diagnosis: an established clinical history of COPD in accordance with the definition by the American Thoracic Society/European Respiratory Society (ERS)

- Smoking history: current or former cigarette smokers with a history of cigarette smoking of  $\geq 10$  pack-years [number of pack years = (number of cigarettes per day / 20) x number of years smoked (eg. 20 cigarettes per day for 10 years, or 10 cigarettes per day for 20 years both equal 10 pack-years)]. Former smokers are defined as those who have stopped smoking for at least 6 months prior to Visit 1. Pipe and/or cigar use cannot be used to calculate pack-year history

- Severity of Disease: A pre and post-albuterol/salbutamol forced expiratory volume in one second/ forced vital capacity (FEV1/FVC ratio of  $< 0.70$  and a post-albuterol/salbutamol FEV1 of  $\geq 30\%$  and  $\leq 70\%$  of predicted normal values at Visit 1. Predicted values will be based upon the ERS Global Lung Function Initiative

- Dyspnea: A score of  $\geq 2$  on the modified medical research council dyspnea scale (mMRC) at Visit 1

Exclusion Criteria:

- Pregnancy: women who are pregnant or lactating or are planning on becoming pregnant during the study.
- Asthma: a current diagnosis of asthma.
- Other respiratory disorders: known alpha-1 antitrypsin deficiency, active lung infections (such as tuberculosis), and lung cancer are absolute exclusionary conditions. A subject who, in the opinion of the investigator, has any other significant respiratory conditions in addition to COPD should be excluded. Examples may include clinically significant bronchiectasis, pulmonary hypertension, sarcoidosis, or interstitial lung disease.
- Other diseases/abnormalities: any subject who is considered unlikely to survive the duration of the study period or has any rapidly progressing disease or immediate life-threatening illness (e.g. cancer). In addition, any subject who has any condition (e.g. neurological condition) that is likely to affect respiratory function should not be included in the study.
- Severe hepatic impairment: patients with severe hepatic impairment (Child-Pugh class C) should be excluded unless, in the opinion of the investigator, the benefit is likely to outweigh the risk.
- Severe renal impairment: patients with severe renal impairment (e.g., end-stage renal disease requiring dialysis) should be excluded, unless in the opinion of the investigator, the benefit is likely to outweigh the risk.
- Unstable or life threatening cardiac disease: long-acting muscarinic antagonists (LAMA) should be used with caution in subjects with severe cardiovascular disease. In the opinion of the investigator, use should only be considered if the benefit is likely to outweigh the risk in conditions such as: Myocardial infarction or unstable angina in the last 6 months, Unstable or life threatening cardiac arrhythmia requiring

heart intervention in the last 3 months, New York Heart Association (NYHA) Class IV failure

- Contraindications: Any history of allergy or hypersensitivity to any anticholinergic/muscarinic receptor antagonist, sympathomimetic, lactose/milk protein or magnesium stearate.

- Antimuscarinic effects: Subjects with medical conditions such as narrow-angle glaucoma, urinary retention, prostatic hypertrophy, or bladder neck obstruction should only be included if, in the opinion of the study physician, the benefit outweighs the risk.

- Hospitalization: hospitalization for COPD or pneumonia within 12 weeks prior to Visit 1.

- Lung resection: lung volume reduction surgery within the 12 months prior to Visit 1.

- 12-Lead electrocardiogram (ECG): Investigators will be provided with ECG reviews conducted by a centralized independent cardiologist to assist in evaluation of subject eligibility. The Investigator will determine the clinical significance of each abnormal ECG finding in relation to the subject's medical history and exclude subjects who would be at undue risk by participating in the trial. Subjects with the following abnormalities are excluded from participation in the study: Atrial fibrillation with rapid ventricular rate >120 beats per minute; sustained or nonsustained ventricular tachycardia; second degree heart block Mobitz type II or third degree heart block (unless pacemaker or defibrillator had been inserted)

- Medication prior to spirometry: unable to withhold albuterol/salbutamol for the 4 hour period required prior to spirometry testing at each study visit.



- Medications prior to screening: use of the following medications according to the following defined time intervals prior to Visit 1: depot corticosteroids 12 weeks, systemic, oral or parenteral corticosteroids 6 weeks, antibiotics (for lower respiratory tract infection) 6 weeks, inhaled long acting beta2 agonists/ inhaled corticosteroid (LABA/ICS) combination products if LABA/ICS therapy is discontinued completely 30 days; LABA/ICS combination products only If discontinuing ICS/ LABA therapy and switching to ICS monotherapy 48 hours for the salmeterol or formoterol component 14 days for the vilanterol component (note: the dose of ICS must be a dose of fluticasone propionate (FP) or equivalent but not to exceed 1000 mcg/day), use of ICS at a dose >1000 microgram (mcg)/day of FP or equivalent 30 days (note: use of ICS is permitted provided the dose does not exceed 1000 mcg of FP or equivalent; ICS use not to be initiated or discontinued within 30 days prior to Visit 1, except for subjects on LABA/ICS therapy who may discontinue the ICS/LABA product as indicated in the table above and switch to ICS monotherapy); initiation or discontinuation of ICS use 30 days (note: use of ICS is permitted provided the dose does not exceed 1000 mcg of FP or equivalent; ICS use not to be initiated or discontinued within 30 days prior to Visit 1, except for subjects on LABA/ICS therapy who may discontinue the ICS/LABA product as indicated in the table above and switch to ICS monotherapy); phosphodiesterase 4 (PDE4) Inhibitor (roflumilast) 14 days; LABA: salmeterol and formoterol 48 hours; olodaterol, indacaterol, and vilanterol 14 days; LAMA: tiotropium, aclidinium, glycopyrronium, umeclidinium 7 days; LAMA/LABA combination products if LAMA/LABA therapy is discontinued completely then apply whichever component has the longest washout; theophyllines 48 hours; Oral beta2-agonists: long-acting 48 hours, short-acting 12 hours; inhaled short acting beta2-agonists 4 hours (note: use of study provided albuterol/salbutamol is permitted during the study, except in the 4-hour period prior to spirometry testing); inhaled short-acting

anticholinergics 4 hours; inhaled short-acting anticholinergic/short-acting beta2-agonist combination products 4 hours; any other investigational medication on 30 days or within 5 drug half-lives (whichever is longer).

- Oxygen: use of long-term oxygen therapy (LTOT) described as oxygen therapy prescribed for greater than 12 hours a day. As-needed oxygen use (i.e. =<12 hours per day) is not exclusionary.

- Nebulized therapy: regular use (prescribed for use every day, not for as-needed use) of short-acting bronchodilators (e.g. albuterol/salbutamol) via nebulized therapy.

- Pulmonary rehabilitation program: participation in the acute phase of a pulmonary rehabilitation program within 4 weeks prior to Visit 1. Subjects who are in the maintenance phase of a pulmonary rehabilitation program are not excluded.

- Drug or alcohol abuse: A known or suspected history of alcohol or drug abuse within 2 years prior to Visit 1.

- Affiliation with investigator site: is an investigator, sub-investigator, study coordinator, employee of a participating investigator or study site, or immediate family member of the aforementioned that is involved in this study.

- Inability to read: in the opinion of the investigator, any subject who is unable to read and/or would not be able to complete a questionnaire

#### NCT02183064 Inclusion Criteria:

- Males and females over the age of 18
- The patient, if female and of reproductive potential (i.e. neither surgically sterilized nor post-menopausal), must be practicing adequate contraception (e.g. intrauterine device, contraceptive pills, Depo-Provera, or implant or double barrier

device) for at least three months prior to and for the duration of their trial participation and must have a negative pregnancy test at screening. Abstinence is not considered to be an acceptable method of contraception. (It should be noted that NSAIDs might interfere with the effectiveness of intrauterine devices)

- The patient must have a documented diagnosis of at least one of the following:
  - Osteoarthritis of the hip
  - Osteoarthritis of the knee
  - Osteoarthritis of the hand or
  - Osteoarthritis of the spine - Patients must have radiographic confirmation of the diagnosis
- The patient is willing to change or requires a change in current prescription NSAID therapy or requires initiation of prescription NSAID therapy for treatment of OA of the hip, knee, hand or spine
- The patient intends to remain a member of their present Managed Care Organization (MCO) for the duration of the trial
- The patient is willing to comply with instructions and to provide written informed consent

Exclusion Criteria:

- The patient has a known or suspected hypersensitivity to the trial drugs or their excipients, analgesics, antipyretics or NSAIDs (prescription or over-the-counter)
- The patient has received an investigational drug or used an investigational device within 30 days prior to entering the trial

- In the opinion of the investigator the patient has any disease or condition that may result in altered absorption, excess accumulation or impaired metabolism or excretion of the trial medication
- The patient has a history of recurrent peptic ulcer or history (within the past 6 months) of gastrointestinal perforation, peptic ulceration documented by endoscopy or radiography, symptomatic hiatal hernia requiring daily treatment or any history of a gastrointestinal tract hemorrhage, except simple hemorrhoidal bleeding
- The patient is currently on coumadin or might be placed on coumadin during the course of the clinical trial
- Patients with dementia, i.e. incapable of following directions or complying with the study protocol
- Patients with co-existing rheumatological disorders including rheumatoid arthritis
- The patient has previously participated in this trial
- Patients with coexisting fibromyalgia or ankylosing spondylitis
- Patient is pregnant or lactating
- Patient has severe hepatic failure
- Patient has non-dialysed renal failure
- Patient has history of GI bleed within the past 6 months
- Patient has history of cerebrovascular bleeding or other bleeding disorders
- Patient is receiving concomitant lithium, heparin or ticlopidine therapy

- Patient has a history of leukopenia (White Blood Cell count < 3500/mm<sup>3</sup>)
- The patient has a history of platelet count below the lower limit of normal or has a documented abnormal prothrombin time (PT) or partial thromboplastin time (PTT)
