# Supplementary material for: Representation of people with comorbidity and multimorbidity in clinical trials of novel drug therapies: an individual-level participant data analysis
Source: Springer Nature journal article supplement (doi:10.1186/s12916-019-1427-1), 2019-11-12
Supplement: MOESM7 [file 17378958]

# 7 Characteristics of primary care populations with each of the trial indications

Mean age (and standard deviation) of primary care patients identified as having each of the trial indications is shown in Table S7.1.

Table S7.1: Primary Care mean age and standard deviation

| <b>index_condition</b>                    | <b>n</b> | <b>mean</b> | <b>sd</b> |
|-------------------------------------------|----------|-------------|-----------|
| Alzheimer's Disease                       | 5144     | 81.6        | 8.5       |
| Asthma                                    | 191160   | 45.6        | 22.9      |
| Atrial Fibrillation                       | 43330    | 74.7        | 11.9      |
| Axial Spondyloarthritis                   | 1982     | 52.4        | 15.3      |
| Benign Prostatic Hyperplasia              | 19906    | 72.0        | 10.0      |
| Dementia (any)                            | 13871    | 82.1        | 9.0       |
| Diabetes Mellitus, Type 2                 | 82473    | 65.3        | 13.0      |
| Epilepsy                                  | 29554    | 45.8        | 21.0      |
| Erectile dysfunction                      | 65736    | 60.0        | 13.1      |
| Hip arthroplasty                          | 3084     | 68.2        | 11.0      |
| Hypertension                              | 310691   | 67.0        | 12.9      |
| Hypertension, Pulmonary                   | 759      | 60.5        | 27.0      |
| Inflammatory bowel disease                | 12514    | 52.3        | 17.8      |
| Knee arthroplasty                         | 3433     | 68.7        | 9.3       |
| Migraine                                  | 19562    | 43.5        | 15.6      |
| Myocardial infarction                     | 3510     | 70.7        | 14.1      |
| Osteoarthritis                            | 124521   | 67.6        | 12.7      |
| Osteoporosis                              | 38212    | 72.8        | 12.2      |
| Parkinson's disease (all)                 | 4998     | 74.9        | 10.4      |
| Parkinson's disease (excluding secondary) | 4727     | 75.0        | 10.2      |
| Psoriasis                                 | 52810    | 49.1        | 19.0      |
| Psoriatic arthropathy                     | 3523     | 54.1        | 14.0      |
| Pulmonary Disease, Chronic Obstructive    | 57378    | 69.1        | 11.6      |
| Pulmonary fibrosis                        | 1465     | 73.3        | 10.9      |
| Restless legs syndrome                    | 11480    | 63.7        | 15.5      |
| Rheumatoid arthritis                      | 13809    | 62.2        | 15.5      |
| Systemic Lupus Erythematosus              | 1033     | 52.8        | 15.5      |
| Thromboembolism                           | 9162     | 66.1        | 15.7      |

[Previous](#) [Next](#)
